1                   **High Light and High Temperature Reduce Photosynthesis**  
2                   **via Different Mechanisms in the C<sub>4</sub> Model *Setaria viridis***

3  
4 Cheyenne M. Anderson<sup>1#</sup>, Erin M. Mattoon<sup>1,2#</sup>, Ningning Zhang<sup>1</sup>, Eric Becker<sup>1</sup>, William  
5 McHargue<sup>1</sup>, Jiani Yang<sup>1</sup>, Dhruv Patel<sup>3</sup>, Oliver Dautermann<sup>3</sup>, Scott A. M. McAdam<sup>4</sup>,  
6 Tonantzin Tarin<sup>5</sup>, Sunita Pathak<sup>1</sup>, Tom J. Avenson<sup>6</sup>, Jeffrey Berry<sup>1</sup>, Maxwell Braud<sup>1</sup>,  
7 Krishna K. Niyogi<sup>3,7,8</sup>, Margaret Wilson<sup>1</sup>, Dmitri A. Nusinow<sup>1</sup>, Rodrigo Vargas<sup>5</sup>, Kirk J.  
8 Czymmek<sup>1</sup>, Andrea L. Eveland<sup>1</sup>, Ru Zhang<sup>1\*</sup>

9 # Equal contribution

10  
11 <sup>1</sup>Donald Danforth Plant Science Center, St. Louis, MO 63132, USA;

12 <sup>2</sup>Plant and Microbial Biosciences Program, Division of Biology and Biomedical  
13 Sciences, Washington University in Saint Louis, St. Louis, MO 63130, USA;

14 <sup>3</sup>Department of Plant and Microbial Biology, University of California, Berkeley, CA 94720,  
15 USA;

16 <sup>4</sup>Purdue Center for Plant Biology, Department of Botany and Plant Pathology, Purdue  
17 University, 915 W State St, West Lafayette, IN, 47907, USA;

18 <sup>5</sup>Department of Plant and Soil Sciences, University of Delaware, Newark, Delaware,  
19 19716, USA;

20 <sup>6</sup>Department of Plant Sciences, University of Cambridge, Cambridge CB2 9EW, UK.

21 <sup>7</sup>Howard Hughes Medical Institute, Berkeley, CA 94720, USA;

22 <sup>8</sup>Molecular Biophysics and Integrated Bioimaging Division, Lawrence Berkeley National  
23 Laboratory, Berkeley, CA 94720, USA.

24  
25 \*Corresponding Author: Ru Zhang, email: [rzhang@danforthcenter.org](mailto:rzhang@danforthcenter.org)

26  
27 **Frequently Used Abbreviations:** HL, high light; HT, high temperature; ctrl, control; M,  
28 mesophyll; BS, bundle sheath; Rubisco, ribulose-1,5-bisphosphate  
29 carboxylase/oxygenase; PSII, photosystem II; PSI, photosystem I; A<sub>Net</sub>, net CO<sub>2</sub>  
30 assimilation rates; DEGs, differentially expressed genes; NPQ, non-photochemical

31 quenching; CEF, cyclic electron flow around PSI; RCA, Rubisco activase; ABA, abscisic  
32 acid; PG, plastoglobuli; HSP, heat shock protein; HSF, heat shock transcription factor.

33

## 34 **Abstract**

35 C<sub>4</sub> plants frequently experience damaging high light (HL) and high temperature (HT)  
36 conditions in native environments, which reduce growth and yield. However, the  
37 mechanisms underlying these stress responses in C<sub>4</sub> plants have been under-explored,  
38 especially the coordination between mesophyll (M) and bundle sheath (BS) cells. We  
39 investigated how the C<sub>4</sub> model plant *Setaria viridis* responded to a four-hour HL or HT  
40 treatment at the photosynthetic, transcriptomic, and ultrastructural levels. Although we  
41 observed a comparable reduction of photosynthetic efficiency in HL- or HT-treated leaves,  
42 detailed analysis of multi-level responses revealed important differences in key pathways  
43 and M/BS specificity responding to HL and HT. We provide a systematic analysis of HL  
44 and HT responses in *S. viridis*, reveal different acclimation strategies to these two  
45 stresses in C<sub>4</sub> plants, discover unique light/temperature responses in C<sub>4</sub> plants in  
46 comparison to C<sub>3</sub> plants, and identify potential targets to improve abiotic stress tolerance  
47 in C<sub>4</sub> crops.

48

## 49 **Introduction**

50 Several of the world's most economically important staple crops utilize C<sub>4</sub> photosynthesis,  
51 including *Zea mays* and *Sorghum bicolor*. C<sub>4</sub> photosynthesis concentrates CO<sub>2</sub> around  
52 Rubisco (ribulose-1,5-bisphosphate carboxylase/oxygenase) by employing biochemical  
53 reactions within mesophyll (M) and bundle sheath (BS) cells<sup>1,2</sup>. The high local  
54 concentration of CO<sub>2</sub> near Rubisco favors carbon fixation over photorespiration, which is  
55 initiated by the oxygenase activity of Rubisco<sup>1,3</sup>. C<sub>4</sub> photosynthesis is hypothesized to  
56 have been selected by low CO<sub>2</sub>, high light (HL), and high temperature (HT) conditions<sup>4,5</sup>.  
57 C<sub>4</sub> plants typically exhibit higher photosynthetic and water-use efficiencies than their C<sub>3</sub>  
58 counterparts under HL or HT<sup>6</sup>. However, C<sub>4</sub> crops experience more frequent damaging  
59 HL or HT stresses in their natural environments than C<sub>3</sub> crops, with reduced C<sub>4</sub> crop yield  
60 regularly occurring in warmer regions<sup>7</sup>. As mean global temperatures continue to

61 increase, maize yields are estimated to decrease between 4 and 12% for each  
62 temperature increase in degree Celsius<sup>7</sup>. Photosynthesis in maize leaves is inhibited at  
63 leaf temperature above 38°C. Recent data from 408 sorghum cultivars shows that  
64 breeding efforts over the last few decades have developed high-yielding sorghum  
65 cultivars with considerable variability in heat resilience and even the most heat tolerant  
66 sorghum cultivars did not offer much resilience to warming temperatures, with a  
67 temperature threshold of 33°C, beyond which sorghum yields start to decline<sup>8</sup>. Under  
68 natural conditions, especially at the tops of canopies, direct sunlight can be very intense  
69 and thus oversaturate the photosynthetic mechanism in C<sub>4</sub> plants. Sorghum leaves had  
70 reduced stomatal conductance and net CO<sub>2</sub> assimilation rates after 4 h exposure to HL  
71 mimicking nature sunlight<sup>9</sup>. To improve C<sub>4</sub> crop yields, it is crucial to holistically approach  
72 how C<sub>4</sub> plants respond to HL or HT, two of the most influential environmental factors that  
73 can compromise C<sub>4</sub> photosynthesis.

74

75 HL responses have been studied extensively in C<sub>3</sub> plants<sup>10–15</sup>. To cope with reactive  
76 oxygen species (ROS) production and photooxidative stress resulting from HL, C<sub>3</sub> plants  
77 have evolved many protective mechanisms which act on different timescales<sup>10,14</sup>. Non-  
78 photochemical quenching (NPQ), especially its predominant component, energy-  
79 dependent quenching (qE), acts within seconds to dissipate excess light energy as  
80 heat<sup>10,16</sup>. The formation of qE depends on the thylakoid lumen pH, the photosystem II  
81 (PSII) polypeptide PsbS, and the accumulation of the xanthophyll pigment zeaxanthin<sup>17–</sup>  
82 <sup>19</sup>. In C<sub>3</sub> plants, under HL, violaxanthin is converted to the intermediate pigment  
83 antheraxanthin which is then converted to zeaxanthin by the enzyme violaxanthin de-  
84 epoxidase<sup>20</sup>. Accumulation of zeaxanthin is also necessary for induction of a slower-  
85 relaxing component of NPQ, zeaxanthin-dependent quenching (qZ)<sup>21</sup>. State transitions,  
86 which restructure the light harvesting complexes (LHCs) around PSII and PSI, occur on  
87 the order of minutes<sup>10,16</sup>. When photoprotective processes are insufficient, HL can result  
88 in photoinhibition (qI), which takes hours to recover<sup>10</sup>. Following HL exposure, expansion  
89 of the thylakoid lumen, swelling of the grana margin, and de-stacking of the thylakoid  
90 grana facilitate PSII repair by promoting accessibility and repair of PSII machinery<sup>15,22–24</sup>.

91 HL stress also results in dynamic transcriptional regulation of photosynthetic genes and  
92 induces the abscisic acid (ABA) pathway in Arabidopsis<sup>11</sup>.

93

94 HT is known to affect many cellular processes in C<sub>3</sub> plants, including various aspects of  
95 photosynthesis<sup>25–29</sup>. C<sub>3</sub> plants under HT have shown decreases in photosynthetic rates,  
96 inactivation of Rubisco, reduction of plastoquinone (PQ), and increase in cyclic electron  
97 flow (CEF) around photosystem I (PSI)<sup>30</sup>. Arabidopsis leaves treated with HT of 40°C has  
98 swollen M chloroplasts and increased plastoglobuli (PG) formation<sup>31</sup>. PG are thylakoid-  
99 associated plastid lipoprotein particles whose size, shape, and counts respond to abiotic  
100 stresses<sup>32</sup>. Additionally, HT induces the expression of heat shock transcription factors  
101 (HSFs), many of which have been implicated in transcriptional responses to numerous  
102 abiotic stresses, including HL and HT<sup>33</sup>. The induced HSFs increase the expression of  
103 heat shock proteins (HSPs), which are chaperone proteins involved in proper protein  
104 folding in response to HT and other abiotic stresses<sup>34</sup>.

105

106 Unlike C<sub>3</sub> plants, studies on how C<sub>4</sub> plants respond to HL or HT are largely limited,  
107 especially the underlying coordination between M and BS cells and the multi-level effects  
108 of HL and HT on photosynthesis, transcriptomes, and ultrastructure of C<sub>4</sub> plants. A recent  
109 study examined the effects of HL stress in the C<sub>4</sub> grass *Setaria viridis* over four days, with  
110 sampling points for photosynthetic parameters, sugar quantification, and transcriptome  
111 analyses every 24 hours<sup>35</sup>. They reported relatively minor transcriptional changes but a  
112 large accumulation of sugars without repression of photosynthesis in HL-treated  
113 samples<sup>35</sup>. These results suggest that prolonged HL-treated leaves undergo adaptive  
114 acclimation and transcriptional homeostasis in a few days. However, the short-term  
115 transcriptional responses of C<sub>4</sub> plants to HL remain largely unknown. In sorghum leaves,  
116 HL induced the avoidance response in M chloroplasts and the swelling of BS chloroplasts  
117 (by cross section light microscope images), but the underlying mechanisms are unclear<sup>9</sup>.  
118 Research about how C<sub>4</sub> photosynthesis responds to HT is mainly limited to biochemical  
119 and gas exchange analyses which suggest that HT results in Rubisco activation<sup>36</sup>, affects  
120 the activities of C<sub>4</sub> carbon fixation enzymes<sup>37</sup>, decreases the BS conductance while  
121 increases CO<sub>2</sub> leakiness<sup>38,39</sup>. Two transcriptome analyses in maize under HT have been

122 reported<sup>40,41</sup>, but thorough analysis of C<sub>4</sub> transcriptome with multi-level effects under HT  
123 is rare. Additionally, ultrastructural analysis in C<sub>4</sub> plants under HL or HT can help us  
124 understand how HL or HT limits C<sub>4</sub> photosynthesis and affects the coordination between  
125 M and BS cells, but currently such information is lacking.

126

127 To gain deeper insights into the molecular and physiological responses of C<sub>4</sub> plants to HL  
128 or HT, we used the green foxtail *Setaria viridis* as a model. *S. viridis* is an excellent model  
129 to study C<sub>4</sub> photosynthesis because of its expanding genetics and genomics toolkit,  
130 common growth condition, relatively quick generation time (8~10 weeks, seed to seed),  
131 and similarity to important agronomic C<sub>4</sub> crops, e.g. maize and sorghum<sup>2,42,43</sup>. We  
132 hypothesized that HL or HT affected C<sub>4</sub> plants at different levels and linking multi-level  
133 changes could improve our understanding of HL or HT tolerance in C<sub>4</sub> plants. We  
134 investigated the response of *S. viridis* to moderately HL or HT over a four-hour time-  
135 course at photosynthetic, ultrastructural, and transcriptomic levels (Fig. 1a). We  
136 monitored the dynamic changes of transcriptomes, pigments, and ABA levels over 4 h  
137 time points during the different treatments. We also measured photosynthetic parameters  
138 and ultrastructural changes after 4 h treatments, which revealed cumulative changes  
139 associated with the different treatments.

140

141 Although we observed a comparable reduction of photosynthetic efficiency in HL- or HT-  
142 treated leaves, detailed analysis at multiple levels revealed different acclimation  
143 strategies to these two stresses in *S. viridis*. The transcriptional changes under HT were  
144 much less but more dynamic than under HL. The HL-treated leaves had over-  
145 accumulated starch in both M and BS chloroplasts, which may increase chloroplast  
146 crowdedness and inhibit PSII repair. While both HL and HT induced PG formation in  
147 chloroplasts, HT-treated leaves also had swollen chloroplasts and grana in M cells.  
148 Additionally, we observed different responses of M and BS cells under HT or HL and  
149 demonstrated the crosstalk between HL response and ABA signaling in C<sub>4</sub> plants. Our  
150 research provides a systematic analysis of HL and HT responses in *S. viridis* and  
151 identifies potential targets to improve stress tolerance in C<sub>4</sub> crops.

152

153 **Results**

154 **HL or HT caused comparable reduction of photosynthesis and HL also resulted in**  
155 **photoinhibition**

156 *S. viridis* leaves treated with 4 h HL (HL\_4h) exhibited significantly reduced maximum  
157 efficiencies of PSII ( $F_v/F_m$ ) as compared to that in 4 h control leaves (ctrl\_4h) (Fig. 1b),  
158 suggesting HL-induced photoinhibition. Net CO<sub>2</sub> assimilation rates ( $A_{Net}$ ) were  
159 significantly reduced in HL or HT-treated leaves in response to changes in light or CO<sub>2</sub>  
160 (Fig. 1c,d). Pre-treatment control leaves (ctrl\_0h) also had lower  $A_{Net}$  as compared to  
161 ctrl\_4h leaves, suggesting circadian regulation of photosynthesis over the course of the  
162 day. The comparisons between different treatments at the 4 h time point should exclude  
163 the effects of circadian regulation. Stomatal conductance and transpiration rates in  
164 response to light were reduced in HL\_4h leaves, especially at the beginning of the light  
165 response curve (Supplementary Fig. 3a,c). Stomatal conductance and transpiration rate  
166 in response to CO<sub>2</sub> were lower in HL\_4h or HT\_4h leaves than ctrl\_4h leaves  
167 (Supplementary Fig. 3b,d). PSII efficiency and electron transport rates in light-adapted  
168 leaves were reduced in HL\_4h leaves as compared to ctrl\_4h leaves in response to light  
169 (Supplementary Fig. 3e, g).

170  
171 To estimate and model a variety of photosynthetic parameters, we assessed various  
172 aspects of leaf-level gas exchange measurements based on the light response curves  
173 and CO<sub>2</sub> response curves (Supplementary Fig. 4). HL or HT compromised photosynthetic  
174 capacities and reduced several photosynthetic parameters in HL\_4h and HT\_4h leaves  
175 compared to ctrl\_4h leaves, including gross maximum CO<sub>2</sub> assimilation rates ( $A_{max}$ ),  
176 maximum carboxylation rates ( $V_{cmax}$ ), and quantum yields of CO<sub>2</sub> assimilation  
177 (Supplementary Fig. 4a,b,c). HL\_4h leaves had reduced stomatal conductance ( $g_s$ ) but  
178 increased light compensation point as compared to ctrl\_4h leaves (Supplementary Fig.  
179 4e, g). HT\_4h leaves had reduced light saturation point as compared to ctrl\_4h leaves  
180 (Supplementary Fig. 4h).

181

182 **Transcriptomics revealed important differences in the key pathways responding to**  
183 **HL or HT**

184 To investigate the transcriptional patterns that may underlie the photosynthesis  
185 phenomena observed above, we performed RNA-seq analysis (Fig. 1a). Principal  
186 component analysis (PCA) of transcripts per million (TPM) (Supplementary Data 1)  
187 normalized read counts from ctrl, HL, and HT treatments showed the experimental  
188 conditions dominated the variance in the dataset (Fig. 2a).

189

190 Next, we compared differentially expressed genes (DEGs) between HL and HT  
191 treatments. Genes that were either up- or down-regulated in at least one time point were  
192 included in the lists of DEGs for each condition. Utilizing this method, we were able to  
193 broadly compare the trends between the HL and HT transcriptomes. There were more  
194 DEGs identified in the HL dataset than the HT dataset (Fig. 2b, Supplementary Fig. 5 and  
195 Data 2). Significantly more genes were up-regulated in both HL and HT-treated  
196 transcriptomes than would be expected by random chance (Fig. 2b, Supplementary Data  
197 4). Additionally, significantly more genes were regulated in opposite directions between  
198 HL and HT transcriptomes than would be expected by random chance. To visualize how  
199 DEGs were conserved between time points within treatments, we plotted the overlaps  
200 between up- and down-regulated genes at each time point. In HL-treated samples, 742  
201 genes were up-regulated at 1, 2, 4 h time points, representing the largest subset of  
202 uniquely overlapping genes and the core HL-induced genes (Fig. 2c, Supplementary Data  
203 3). Similarly, 674 genes were down-regulated at all three time points of HL treatment,  
204 representing the core HL-reduced genes. Conversely, in the HT-treated samples, the  
205 expression pattern was dominated by genes differentially expressed at a single time point  
206 (Fig. 2d), indicating the transcriptional response to HT was more transient and dynamic  
207 than that to HL. In HT-treated samples, 102 and 72 genes were up- and down-regulated  
208 at all three time points, representing the core HT induced and reduced genes,  
209 respectively.

210

211 To reveal transcriptional changes that may explain the reduced photosynthesis under HL  
212 or HT, we grouped DEGs into several key pathways. Investigation of genes related to the  
213 light reaction of photosynthesis revealed that many genes involved in PSII  
214 assembly/repair and photoprotection (e.g., *PsbS*), were up-regulated in HL, while many

215 genes relating to LHCII and the core complexes of PSII/PSI were down regulated in HL  
216 (Fig. 3a,b). Although HT treatment did not result in the same extent of differential  
217 regulation of light reaction related genes as HL, STN7, a kinase involved in state 1 to  
218 state 2 transitions<sup>44</sup> was induced, while TAP38, a phosphatase involved in state 2 to state  
219 1 transitions<sup>45</sup>, was repressed in HT-treated leaves (Supplementary Fig. 6a). This  
220 suggests a possible heat induced state transition to move the mobile LHCII from PSII  
221 (state 1) to PSI (state 2). Additionally, several genes related to the chloroplast NDH  
222 (NADPH dehydrogenase) complex were up-regulated in the HT treatment (Fig. 3b).  
223 Furthermore, when investigating genes involved in cyclic electron flow (CEF)  
224 (Supplementary Fig. 6), we found that key components of CEF, *PGR5* (*proton gradient*  
225 *regulation 5*)<sup>46</sup> and two copies of *PGRL1* (*PGR5-like photosynthetic phenotype 1*)<sup>47</sup>, were  
226 induced under HT, suggesting heat-induced CEF around PSI.

227

228 Under HL treatment, the transcriptional changes of genes involved in the Calvin-Benson  
229 cycle were less than those involved in the light reactions of photosynthesis (Fig. 3c).  
230 Rubisco activase (RCA) is essential for CO<sub>2</sub> fixation by maintaining the active status of  
231 Rubisco<sup>48,49</sup>. The *S. viridis* genome has two adjacent genes encoding RCAs  
232 (Supplementary Fig. 7). Protein sequence alignment of the two *S. viridis* RCAs with  
233 Arabidopsis RCAs revealed one SvRCA- $\alpha$  which retains the two conserved redox-  
234 sensitive cysteine residues as in AtRCA- $\alpha$ , and one SvRCA- $\beta$  which has higher basal  
235 expression (approximately 700-fold higher) than SvRCA- $\alpha$  and possibly the major RCA  
236 in *S. viridis*. SvRCA- $\alpha$  was highly induced during the entire 4 h HT (Fig. 3c).

237

238 Key genes involved in photorespiration, e.g. *GOX1* (glycolate oxidase)<sup>50,51</sup> and *AGT1*  
239 (Serine:glyoxylate aminotransferase)<sup>52</sup> were down-regulated under HL (Fig. 3c). *GOX1*  
240 and several other genes involved in photorespiration, *PGLP1* (2-phosphoglycolate  
241 phosphatase)<sup>53</sup>, *HPR1* (hydroxypyruvate reductase)<sup>54</sup>, and *PLGG1* (plastidic  
242 glycolate/glycerate transporter)<sup>55</sup> were induced under HT, suggesting heat-induced  
243 photorespiration.

244



245 Some genes important for C<sub>4</sub> carbon metabolism were up-regulated under HL (Fig. 3c),  
246 e.g. *PEPC\_B* (phosphoenolpyruvate carboxylase) and *NADP-MDH* (NAD-dependent  
247 malate dehydrogenase)<sup>1</sup>. Carbonic anhydrase<sup>56</sup> (*CA\_A*) was induced under both HL and  
248 HT.

249  
250 By investigating pathways associated with photosynthesis, we found HL increased the  
251 expression of starch biosynthesis/degradation genes and genes encoding PG-localized  
252 proteins (Fig. 4a), but down-regulated several genes in the sugar-sensing pathway (Fig.  
253 4b), and differentially regulated several sugar transporter genes (Supplementary Fig. 6b).  
254 These transcriptional changes were much less pronounced under HT.

255  
256 Several HSFs had highly induced expression under either HL or HT, but interestingly,  
257 different HSFs were up-regulated in HL vs HT (Fig. 4c). *HSFA6B* was a notable exception,  
258 which was induced in both HL and HT. A set of shared HSPs were induced under both  
259 HT and HL, but the induction was quicker and stronger under HT than HL, especially the  
260 small HSPs, suggesting shared but also temporally distinct transcriptional responses of  
261 HSPs under HL and HT.

262  
263 We also investigated genes associated with ROS pathways. Specialized ROS  
264 scavenging pathways have evolved in plants<sup>57</sup>. We identified genes encoding antioxidant  
265 enzymes in *S. viridis* and investigated their expression patterns under HL or HT  
266 (Supplementary Fig. 6c). Three gene families of antioxidant enzymes have many  
267 members with strong differential expression in HL-treated leaves: TRX (thioredoxin), POX  
268 (peroxidases), and GST (glutathione S-transferase). Interestingly, within each of the three  
269 antioxidant pathways, some genes were up-regulated while others were down-regulated  
270 in HL-treated leaves. A similar pattern was shown in HT-treated leaves, although with  
271 fewer differentially regulated genes.

272  
273 The reduced stomatal conductance in HL\_4h leaves (Supplementary Fig. 3a) suggested  
274 there may be changes in ABA pathways and leaf ABA levels. Our RNA-seq analysis  
275 showed that several genes in the ABA pathways were up-regulated in response to HL

276 (Fig. 5a). Additional, ABA levels were increased 3-fold in HL\_1h leaves followed by a  
277 return to baseline by HL\_4h (Fig. 5b).

278

279 To distinguish M and BS specific transcriptomic responses and gain more information  
280 about how these two specialized cell types function together in HL or HT responses, we  
281 investigated the cell type specificity of our pathways of interest (Supplementary Fig. 8,  
282 Supplementary data 6) by using previously published M and BS specific transcriptomes  
283 under control conditions<sup>58</sup>. We observed several cell-type specific transcriptional  
284 responses to HL or HT, e.g. pathways related to ROS-scavenging, sugar transport, and  
285 HSPs.

286

### 287 **HL treatment induced NPQ in *S. viridis***

288 The increased photoinhibition in HL\_4h leaves and the increased *PsbS* transcription  
289 under HL prompted us to quantify NPQ and xanthophyll pigments. NPQ was significantly  
290 higher in HL\_4h leaves than ctrl\_4h leaves in response to light and CO<sub>2</sub> (Fig. 6a,b). The  
291 HL-induced NPQ measured by LI\_6800 was confirmed using MultispeQ with the  
292 estimated NPQ, NPQ<sub>(T)</sub>, based on a method that estimates NPQ in light-adapted leaves<sup>59</sup>  
293 (Supplementary Fig. 9c). The increased NPQ was also supported by the observed 4-fold  
294 increase of zeaxanthin (Fig 6c) during HL. Additionally, HL treatment doubled the  
295 intermediate antheraxanthin level (Fig. 6d) and tripled the overall de-epoxidation state of  
296 the xanthophyll cycle (Fig. 6e). In Arabidopsis, lutein also has a role in NPQ or qE and  
297 can substitute for zeaxanthin in qE formation<sup>60</sup>. Lutein as well as total carotenoids were  
298 significantly induced in HL\_4h leaves (Supplementary Fig. 10c,d). These results indicate  
299 the occurrence of photoprotection in HL-treated leaves. Ctrl and HT treatments had little  
300 effect on leaf pigments.

301

### 302 **HL or HT altered chloroplast ultra-structures**

303 The reduced photosynthesis (Fig. 1c,d) in HL\_4h and HT\_4h leaves, and the HL-induced  
304 photoinhibition (Fig. 1b) and transcripts related to the starch as well as PG pathways (Fig.  
305 4a) led us to investigate the ultrastructural changes of the M and BS chloroplasts in  
306 ctrl\_4h, HL\_4h, and HT\_4h leaves by using transmission electron microscopy (TEM).

307 TEM images showed HL\_4h leaves had increased relative starch volume fraction and  
308 chloroplast area in both M and BS chloroplasts, but decreased relative volume fractions  
309 of stroma plus stroma lamellae (unstacked thylakoid membranes) in M chloroplasts as  
310 compared to ctrl\_4h leaves (Fig. 7, Supplementary Fig. 15), suggesting increased starch  
311 accumulation and chloroplast crowdedness under HL. Starch quantification using  
312 biochemical assays confirmed 3x starch levels in HL\_4h leaves as compared to ctrl\_4h  
313 leaves (Fig. 7m). In HT\_4h leaves, M chloroplasts had reduced relative starch volume  
314 fraction but increased chloroplast area (Fig. 7, Supplementary Fig. 15). HT did not affect  
315 the relative volume of stroma or stroma lamellae in either M or BS chloroplasts.

316

317 Like in other  $C_4$  plants, grana in *S. viridis* are dominantly present in the M chloroplasts.  
318 BS chloroplasts also have some grana, which are absent from the central area but present  
319 in the peripheral region (Fig. 7d-f). HL reduced grana width in M chloroplasts and the  
320 relative volume, height, and area of grana in BS chloroplasts as compared to the ctrl  
321 condition (Fig. 7j, Supplementary Fig. 14,15). The HT effects on grana structure were  
322 quite different from HL. M chloroplasts at HT had increased relative volume, height, area,  
323 and mean layer thickness of grana, indicating heat-induced grana swelling. However, in  
324 BS chloroplasts, HT decreased the relative volume, width, and area of grana, suggesting  
325 that HT affected grana structure differently in M and BS chloroplasts.

326

327 HL increased PG count and the total PG area per chloroplast, while it decreased the mean  
328 individual PG size in M chloroplasts, indicating smaller but more numerous PGs in M  
329 chloroplasts (Fig. 7k, l, Supplementary Fig. 13). Furthermore, HL increased individual PG  
330 size and total PG area per chloroplast in BS chloroplasts (Supplementary Fig. 13). HT  
331 increased individual PG size and total PG area, suggesting heat-induced PG formation in  
332 both M and BS chloroplasts.

333

### 334 **HL- and HT-treated Leaves had reduced photosynthetic capacity**

335 The over-accumulated starch in HL\_4h leaves (Fig. 7) and the increased leaf ABA levels  
336 (Fig. 5) led us to investigate photosynthesis under the simulated stress conditions and  
337 immediately after different treatments without dark-adaptation in the LI\_6800 leaf

338 chamber (Fig. 8). Under the same temperature and light intensity in the LI-6800 leaf  
339 chamber, most photosynthetic parameters with or without dark-adaptation were similar  
340 (groups 1 vs. 2) (Fig. 8). Under the simulated treatment condition in the LI-6800 leaf  
341 chamber (group 3), HL\_4h leaves had higher net CO<sub>2</sub> assimilation rates ( $A_{Net}$ ) and  
342 stomatal conductance under 600  $\mu\text{mol photons m}^{-2} \text{s}^{-1}$  light than ctrl\_4h leaves under 200  
343  $\mu\text{mol photons m}^{-2} \text{s}^{-1}$  light, but both parameters in HL\_4h leaves were lower than ctrl\_4h  
344 leaves under the same light intensity (group 3, 4) (Fig. 8a). This suggests that HL\_4h  
345 leaves had reduced capacities for  $A_{Net}$  and stomatal conductance as compared ctrl\_4h  
346 leaves under the same condition. Under the simulated treatment condition (group 3),  
347 HL\_4h leaves under 600  $\mu\text{mol photons m}^{-2} \text{s}^{-1}$  light had reduced PSII operating efficiency  
348 (Fig. 8c), increased electron transport rates (Fig. 8d), and increased NPQ (Fig. 8f) as  
349 compared to the ctrl\_4h leaves under 200  $\mu\text{mol photons m}^{-2} \text{s}^{-1}$  light, consistent with light  
350 induced electron transport and NPQ.

351  
352 Without dark-adaptation, HT\_4h leaves had similar  $A_{Net}$  as ctrl\_4h leaves (Fig. 8a, group  
353 2). This may be due to the transient recovery of photosynthesis after switching the HT\_4h  
354 leaves from 40°C in the growth chamber to 25°C in the LI\_6800 leaf chamber for  
355 measurements. Under the same light intensity, HT\_4h leaves had significantly lower  $A_{Net}$   
356 (Fig. 8a) and more reduced plastoquinone (Fig. 8e) than ctrl\_4h leaves. Under the  
357 simulated treatment condition in LI-6800 leaf chamber (group 3), HT\_4h leaves had  
358 increased stomatal conductance (Fig. 8b) but reduced  $A_{Net}$  as compared to ctrl\_4h leaves  
359 (Fig. 8a), consistent with transpiration cooling of leaf temperature (Supplementary Fig. 1)  
360 and reduced photosynthetic capacity in HT-treated leaves (Supplementary Fig. 4a-c).

361

### 362 **The activity of ATP synthase was inhibited in HL-treated leaves**

363 Based on the HL-induced starch accumulation, we hypothesized that starch may inhibit  
364 photosynthesis through feedback regulation. We measured electrochromic shift (ECS)  
365 and chlorophyll fluorescence using MultispeQ<sup>61</sup> to evaluate proton fluxes and the  
366 transthylakoid proton motive force ( $pmf$ ) *in vivo*<sup>62-64</sup>. Different treatments did not  
367 significantly change  $pmf$  (Fig. 9a). HL\_4h leaves had significantly reduced proton  
368 conductivity and lower proton flux rates as compared to ctrl\_4h leaves (Fig. 9b,c),

369 indicating reduced ATP synthase activity in HL-treated leaves. The MultispeQ NPQ<sub>(T)</sub> data  
370 showed that the HL-induced NPQ was more sensitive to *pmf* than ctrl\_4h leaves, with  
371 higher NPQ produced at a given level of proton motive force in HL\_4h leaves than ctrl\_4h  
372 leaves (Fig. 9d).

373

## 374 **Discussion**

375 We investigated how the C<sub>4</sub> model plant *S. viridis* responds to HL or HT stresses at  
376 multiple levels by employing diverse approaches (Fig. 1a). Our data provide a thorough  
377 analysis of HL and HT responses in *S. viridis* at photosynthetic, transcriptomic, and  
378 ultrastructural levels and reveal limitations of photosynthesis under HL or HT. The HL  
379 (900 μmol photons m<sup>-2</sup> s<sup>-1</sup>) and HT (40°C) treatments we chose were both moderate  
380 stresses within the physiological range for *S. viridis*. Although the impact of moderate  
381 stresses can be difficult to analyze due to mild phenotypes, moderate stresses are highly  
382 relevant and occur frequently in the field<sup>65</sup>. Understanding the impacts of moderate  
383 stresses on C<sub>4</sub> plants is imperative for agricultural research. The moderately HL and HT  
384 we used reduced net CO<sub>2</sub> assimilation rates at comparable levels in *S. viridis* leaves (Fig.  
385 1c), but via different mechanisms (Fig. 10).

386

### 387 **Starch over-accumulation may contribute to photoinhibition in HL-treated leaves**

388 In response to HL, *S. viridis* induced NPQ to dissipate excess light energy via increased  
389 *PsbS* transcription and zeaxanthin accumulation (Fig. 3a, 6c). At the transcriptional level,  
390 HL-treated plants up-regulated transcripts involved in PSII assembly/repair and  
391 photoprotection before down-regulating transcripts involved in LHCII, PSII core complex,  
392 and PSI complex (Fig. 3), suggesting a strategy to dissipate light and repair damaged  
393 PSII before the remodeling of photosystems. With the rapid induction of photoprotective  
394 pathways, it was initially surprising to see the significant amount of photoinhibition in HL-  
395 treated leaves of *S. viridis* (Fig. 1b), but the HL-induced starch accumulation may provide  
396 some insight.

397

398 Our TEM data showed that the mean relative starch volume fraction was increased  
399 significantly in both M and BS chloroplasts in HL\_4h leaves as compared to ctrl\_4h leaves

400 (Fig. 7, Supplementary Fig. 15). The increased starch accumulation likely resulted from  
401 increased CO<sub>2</sub> fixation rates (Fig. 8a) but imbalance of starch synthesis/ degradation and  
402 sugar transport from downstream pathways under HL. In C<sub>3</sub> plants, starch is mostly  
403 present in M chloroplasts where photosynthesis occurs<sup>66,67</sup>. In C<sub>4</sub> plants, starch is present  
404 in both BS and M chloroplasts (Fig. 7a-f), although Rubisco dominantly localizes in the  
405 BS chloroplasts<sup>67</sup>. The over-accumulated starch increased the crowdedness of the  
406 chloroplasts (Fig. 7, Supplementary Fig. 15), which may hinder PSII repair, especially in  
407 M chloroplasts where PSII is enriched. PSII complexes are concentrated in the stacked  
408 grana regions; during PSII repair, damaged PSII subunits migrate from the stacked grana  
409 region to the grana margin and the unstacked grana region (stroma lamellae) where the  
410 proteins involved in PSII repair are localized (e.g., FtsH, Deg proteases that degrade  
411 damaged PSII subunits)<sup>15,68</sup>. In Arabidopsis under HL, the grana lumen and margin swell  
412 to facilitate protein diffusion and PSII repair<sup>23,69</sup>, however, we did not see these changes  
413 in HL-treated *S. viridis* leaves (Supplementary Fig. 12d, e, i). Starch overaccumulation  
414 and increased chloroplast crowdedness may slow down the migration of damaged PSII  
415 subunits and inhibit PSII repair, contributing to the HL-induced photoinhibition (Fig. 1b,  
416 10). Additionally, ATP synthase activity was significantly reduced in HL\_4h leaves as  
417 compared to ctrl\_4h leaves (Fig. 9b,c), which may be associated with the starch  
418 accumulation and sugar feedback inhibition of photosynthesis. HL-treated Arabidopsis  
419 plants had reduced starch in chloroplasts<sup>70</sup>, which may reflect the differences in  
420 experimental conditions or the stronger capability to use HL for carbon fixation in C<sub>4</sub> plants  
421 than C<sub>3</sub> plants.

422

### 423 **HL differentially regulated genes involved in sugar-sensing pathways**

424 Sugar signaling integrates sugar production with environmental cues to regulate  
425 photosynthesis<sup>35,71,72</sup>. In C<sub>3</sub> plants, some of the sugar-sensing pathways include: (1)  
426 SnRK1 pathway (sucrose-non-fermenting 1 related protein kinase 1, starvation sensor,  
427 active under stressful and sugar deprivation conditions to suppress growth and promote  
428 survival)<sup>73-75</sup>; (2) Trehalose pathway (trehalose is a signal metabolite in plants under  
429 abiotic stresses and helps plants survive stresses)<sup>65,76</sup>. Sugar sensing pathways under  
430 abiotic stresses are underexplored in C<sub>4</sub> plants<sup>35</sup>. Our RNA-seq data showed that two

431 subunits of SnRK1 ( $\beta 2$ ,  $\gamma 4$ ) were highly down-regulated under HL (Fig. 4b), suggesting  
432 possible inhibition of the SnRK1 pathway. In the trehalose pathway, trehalose-6-  
433 phosphate synthase (TPS) produces trehalose-6-phosphate (T6P); the T6P phosphatase  
434 (TPP) dephosphorylates T6P to generate trehalose<sup>65</sup>. A copy of the potential catalytically  
435 active *TPS* (*TPSI*) in *S. viridis* was induced and two copies of *TTP* were down-regulated  
436 during HL (Fig. 4b), suggesting possible increased level of T6P. T6P is a signal of sucrose  
437 availability, inhibits SnRK1 pathway, promotes plant growth and development<sup>77,78</sup>. Based  
438 on the expression pattern of genes involved in sugar-sensing pathways and the over-  
439 accumulated starch under HL, we postulated that HL-treated *S. viridis* leaves had  
440 increased sugar levels, and possibly up-regulated T6P sugar-sensing pathway to down-  
441 regulate the SnRK1 pathway and promote plant growth<sup>76,79</sup>, which may alleviate the  
442 stress of starch over-accumulation and photosynthesis inhibition under HL.

443

#### 444 **Potential links between HL response and ABA pathway exist in *S. viridis***

445 The links between HL responses and ABA have been reported in C<sub>3</sub> plants<sup>11,12,80,81</sup>.  
446 Arabidopsis ABA biosynthesis mutants (e.g., *nced3*) were more sensitive to HL than  
447 WT<sup>11,12</sup>. HL-treated *S. viridis* leaves had reduced capacity for stomatal conductance (Fig.  
448 8b), which can most likely be attributed to an acute increase of ABA levels in HL-treated  
449 leaves (Fig. 5b). Although ABA levels were only significantly increased at HL\_1h and then  
450 gradually decreased, the ABA-induced stomatal closure may be prolonged. Consistent  
451 with this, RNA-seq data showed increased expression of genes involved in ABA  
452 responses and signaling during the 4-h HL treatment (Fig. 5a). Stomatal conductance  
453 increases with light to increase CO<sub>2</sub> uptake, which also increases water loss. To reduce  
454 water loss and improve water use efficiency, a relatively lower stomatal conductance  
455 under HL may be an adaptive response. Our results in *S. viridis* provide insight into the  
456 reduced stomatal conductance and photosynthesis in sorghum leaves under HL<sup>9</sup>.

457

458 ABA homeostasis is maintained by the balance of its biosynthesis, catabolism,  
459 reversible glycosylation, and transport pathways<sup>19</sup>. Several ABA biosynthesis genes were  
460 up-regulated during HL (Fig. 5a), including *NCED1* (9-cis epoxy-carotenoid  
461 dioxygenase)<sup>19,82,83</sup> and *ABA1/ZEP1*, suggesting that local, *de novo* ABA biosynthesis

462 may be one source of the rapid and large induction of ABA at HL\_1h. The up-regulation  
463 of *CYP707As*, which are responsible for ABA degradation<sup>84</sup>, may contribute to the gradual  
464 reduction of ABA levels after 1 h HL. Furthermore, the *S. viridis* homolog of Arabidopsis  
465 BG1 (glucosidases, hydrolyze inactive ABA-GE to active ABA in endoplasmic reticulum)<sup>85</sup>  
466 was induced at HL\_2h and HL\_4h. Dehydration rapidly induces polymerization of AtBG1  
467 and a 4-fold increase in its enzymatic activity<sup>85</sup>. It is possible that the hydrolysis of ABA-  
468 GE to ABA by polymerized BG1 may precede the induction of the BG1 transcript,  
469 contributing to the transiently increased ABA levels. Several putative ABA transporters  
470 were not differentially expressed (Supplementary Data 6), but a *S. viridis* homolog of the  
471 Arabidopsis ABA importer *ABCG40* was down-regulated in HL (Fig. 5a), suggesting ABA  
472 import from other parts of the plant to leaves may be less likely. Thus, the HL increased  
473 ABA level may be due to ABA *de novo* biosynthesis and/or reversible glycosylation from  
474 ABA-GE to ABA.

475

#### 476 **HT responses had distinct features in comparison to HL**

477 Compared to HL, HT\_4h leaves showed much less change in starch accumulation, little  
478 change in chloroplast crowdedness (Fig. 7), and no photoinhibition (Fig. 1). Under HT, M  
479 chloroplasts had reduced relative starch volume fraction but increased chloroplast area  
480 as compared to ctrl (Supplementary Fig. 13), suggesting heat-induced chloroplast  
481 swelling that is independent of starch accumulation. Grana dimension increased in HT-  
482 treated M chloroplasts (Supplementary Fig. 13), suggesting heat-induced grana swelling.  
483 In contrast, BS chloroplasts have slightly increased starch, no change of chloroplast area,  
484 but decreased grana dimension under HT, suggesting cell-type specific heat responses.  
485 PG formation was highly induced in both M and BS chloroplasts under HT, which may be  
486 associated with heat-increased thylakoid membrane leakiness, consistent with previous  
487 reports<sup>26,86,87</sup>. Induced chloroplast/grana swelling and PG formation may reflect heat-  
488 induced damage to chloroplast ultrastructure, which may contribute to the reduced  
489 photosynthetic rates under HT.

490

491 The transcriptome changes under HT were less extensive but more dynamic than under  
492 HL (Fig. 2-5). HT induced more PG formation than HL (Supplementary Fig. 13), however,



493 surprisingly there were few transcriptional changes of genes encoding proteins that  
494 localize to PG under HT (Fig. 4a). These results suggest the heat-induced PG formation  
495 may be a direct and physical response of thylakoid membranes to moderately HT and not  
496 regulated at the transcriptional level.

497

498 Response to HT also showed some unique transcriptional changes that were absent or  
499 minimal under HL. First, HT resulted in high and sustained induction of Rubisco activase  
500 (*RCA\_α*) (Fig. 3c). RCA removes inhibitors from Rubisco, maintains Rubisco activation,  
501 and is important for carbon fixation<sup>48,49</sup>. Rubisco is thermostable but RCAs are heat labile,  
502 resulting in reduced Rubisco activation and CO<sub>2</sub> fixation under HT<sup>36</sup>. Plants grown in  
503 warm environments usually have RCAs that are more thermotolerant<sup>88-90</sup>. In *S. viridis*,  
504 maize, and sorghum, HT induces the protein level of *RCA\_α* and the rate of *RCA\_α*  
505 induction is associated with the recovery rate of Rubisco activation and photosynthesis<sup>91</sup>,  
506 suggesting the heat-induced *RCA\_α* may be the thermotolerant isoform. Understanding  
507 the function and regulation of RCAs may help improve thermotolerance of photosynthesis  
508 in C<sub>4</sub> plants. Additionally, HT upregulated small *HSPs* much quicker than HL.

509

510 Key genes involved in photorespiration (Fig. 3c) and cyclic electron flow (CEF) around  
511 PSI (Supplementary Fig. 6a) were up-regulated under HT, suggesting HT-induced  
512 photorespiration and CEF. C<sub>4</sub> plants employ carbon-concentrating mechanisms (CCM) to  
513 concentrate CO<sub>2</sub> around Rubisco and reduce photorespiration in the BS chloroplasts.  
514 However, *S. viridis* BS chloroplasts have a small number of grana (Fig. 7d-f), where PSII  
515 is present and can be a source of O<sub>2</sub> production. Photorespiration increases with  
516 temperature faster than photosynthesis<sup>30,92</sup> and HT may also increase the CO<sub>2</sub> leakiness  
517 of BS chloroplasts<sup>38,39</sup>, promoting photorespiration and reducing photosynthesis. CEF  
518 generates only ATP without NADPH, balances ATP/NADPH ratio, generates  
519 transthylakoid proton motive force (*pmf*), and protects both PSI and PSII from photo-  
520 oxidative damage in C<sub>3</sub> plants<sup>93,94</sup>. Increased CEF activity has been frequently reported  
521 under stressful conditions in C<sub>3</sub> plants<sup>26,95,96</sup>, indicating its important role in stress  
522 protection. To compensate for the extra ATP needed for CCM, C<sub>4</sub> plants are proposed to  
523 have high CEF in BS chloroplasts<sup>3,97</sup>. CEF is reported to increase in *S. viridis* under salt

524 stress<sup>98</sup>. The heat-induced CEF could protect photosynthesis under HT by maintaining  
525 transthylakoid *pmf* and generating extra ATP.

526

527 Frey et al. identified 39 heat-tolerance genes in maize that were significantly associated  
528 with heat-tolerance and up-regulated in most of the 8 maize inbred lines<sup>41</sup>. Five *S. viridis*  
529 homologs of the maize heat-tolerance genes were also up-regulated in our RNA-seq data  
530 under HT, providing potential engineering targets to improve heat tolerance in C<sub>4</sub> plants  
531 (Supplementary Data 5).

532

533 Although HL and HT responses had their own unique features, their transcriptional  
534 responses had significant overlaps (Fig. 2b). We identified 42 highly induced genes (FC  
535  $\geq 5$ ) and 13 highly repressed genes (FC  $\leq -5$ ) in both conditions (Supplementary Fig. 5,  
536 Supplementary Data 5). The 42 highly induced genes provide potential targets for  
537 improving resistance to HL and HT in C<sub>4</sub> crops, including several putative transcription  
538 factors, HSP20/70/90 family proteins,  $\beta$ -amylase, and a putative aquaporin transporter for  
539 promoting CO<sub>2</sub> conductivity in C<sub>4</sub> plants<sup>3,99,100</sup>. Additionally, *HSFA6B* was induced ( $2 \leq$  FC  
540  $\leq 5$ ) at both HL and HT. It is reported that *HSFA6B* operates as a downstream regulator  
541 of the ABA-mediated stress response and is involved in thermotolerance in Arabidopsis,  
542 wheat, and barley<sup>101,102</sup>. This gene may be involved in regulation of genes that are  
543 common to both the HL and HT responses and it would be interesting for further study to  
544 generate HL and HT tolerant C<sub>4</sub> crops.

545

546 In comparison to the C<sub>3</sub> model plant Arabidopsis, the C<sub>4</sub> model plant *S. viridis* has shared  
547 and unique responses under HL and HT. The shared responses include induced NPQ,  
548 *PsbS* transcription, zeaxanthin accumulation, PG formation, and ABA levels under HL,  
549 and the induced PG formation as well as swollen M chloroplasts under HT. The unique  
550 responses in *S. viridis* to HL include the over-accumulated starch in both M and BS  
551 chloroplasts and increased chloroplast crowdedness. In HT, the unique responses in *S.*  
552 *viridis* include dynamic transcriptome regulation and different heat sensitivities of M and  
553 BS chloroplasts. The reduced photosynthetic capacity under HL or HT also demonstrated  
554 the need to increase the tolerance to these two stresses in C<sub>4</sub> plants.

555 The different responses in M and BS chloroplasts in *S. viridis* are particularly interesting  
556 and warrant further study. We sorted HL or HT induced DEGs into M and BS specific  
557 pathways based on previously published M/BS transcriptomes<sup>58</sup> (Supplementary Fig. 8).  
558 Although we cannot rule out some transcripts may have altered cell type specificity under  
559 stressful conditions, due to the function specificity of the M and BS cells, a significant  
560 fraction of the M and BS specific transcripts likely keep similar cell type specificity under  
561 our HL and HT conditions as compared to the published control condition. Our analysis  
562 revealed M- and BS-specific transcriptional regulation in response to HL or HT in *S. viridis*  
563 (Supplementary Fig. 8). Under HL, the majority of M-specific DEGs related to ROS-  
564 scavenging and HSPs were up-regulated while the majority of BS-specific DEGs related  
565 to these two pathways were down-regulated, suggesting M cells may require more ROS  
566 scavenging and HSPs than BS cells in response to HL, probably due to more ROS  
567 production and higher need for maintaining protein homeostasis in M cells than BS cells  
568 under HL. In contrast, under HT, many ROS-scavenging DEGs were up-regulated in BS  
569 cells but down-regulated in M cells (possibly due to heat-induced photorespiration) while  
570 DEGs related to HSPs were up-regulated in both cell types. It is intriguing that HL up-  
571 regulated M-specific sugar transporters but down-regulated BS-specific sugar  
572 transporters. In Arabidopsis, SWEET16/17 plays a key role in facilitating bidirectional  
573 sugar transport along sugar gradient across the tonoplast of vacuoles<sup>103,104</sup>. The  
574 homologous copy of SWEET16/17 in *S. viridis* is M-cell specific and was up-regulated in  
575 HL (Supplementary Fig. 6b), suggesting SvSWEET16/17 may mediate sugar uptake into  
576 vacuoles in response to a high concentration of cytosolic sugar level in M cells. The down-  
577 regulation of BS-specific SWEETs under HL may indicate feedback inhibition of sugar  
578 phloem loading due to unmatched sugar usage in downstream processes<sup>105</sup>.

579

580 In summary, we elucidated how the C<sub>4</sub> model plant *S. viridis* responds to moderately HL  
581 or HT at the photosynthetic, transcriptomic, and ultrastructural levels (Supplementary Fig.  
582 14). Our research furthers understanding of how C<sub>4</sub> plants respond to HL and HT by  
583 linking the data from multiple levels, reveals different acclimation strategies to these two  
584 stresses in C<sub>4</sub> plants, discovers unique HL/HT responses in C<sub>4</sub> plants in comparison to  
585 C<sub>3</sub>, demonstrates M/BS cell type specificity under HL or HT, distinguishes adaptive from

586 maladaptive responses, and identifies potential targets to improve abiotic stress tolerance  
587 in C<sub>4</sub> crops.

588

## 589 **Methods**

### 590 **Plant growth conditions and treatments**

591 *S. viridis* ME034 (also known as ME034v) plants were grown in a controlled  
592 environmental chamber under constant 31°C, 50% humidity, ambient CO<sub>2</sub> conditions, 12  
593 h photoperiod, and leaf level light intensity of 250 μmol photons m<sup>-2</sup> s<sup>-1</sup>. Similar level of  
594 growth light has been used in literatures for *S. viridis* under control conditions<sup>58,98,106</sup>.  
595 Seeds were germinated on Jolly Gardener C/V Growing Mix (BGF Supply Company,  
596 Oldcastle, OCL50050041) and fertilized with Jack's 15-5-15 (BGF Supply Company, J.R.  
597 Peters Inc., JRP77940) with an Electrical Conductivity (EC) of 1.4. At seven days after  
598 sowing (DAS), seedlings were transplanted to 3.14" x 3.18" x 3.27" pots. At 13-DAS, 4 h  
599 after light was on in the growth chamber, plants with fourth fully expanded true leaves  
600 were selected for 4 h HL (leaf level light intensity of 900 μmol photons m<sup>-2</sup> s<sup>-1</sup> and chamber  
601 temperature of 31°C) or 4 h HT (chamber temperature of 40°C and leaf level light intensity  
602 of 250 μmol photons m<sup>-2</sup> s<sup>-1</sup>) treatments carried out in separate controlled environmental  
603 chambers under 50% humidity and ambient CO<sub>2</sub> conditions. A separate set of plants  
604 remained in the control chamber set to growth conditions. Leaf temperature was stable  
605 at 31°C under control and HL treatments while it increased gradually from 31°C to 37°C  
606 by the end of 4 h treatment of 40°C (Supplementary Fig. 1).

607

### 608 **Gas-exchange and chlorophyll fluorescence measurements**

609 Leaf-level gas exchange and pulsed amplitude modulated (PAM) chlorophyll *a*  
610 fluorescence was measured using a portable gas-exchange system LI-6800 coupled with  
611 a Fluorometer head 6800-01 A (LI-COR Biosciences, Lincoln, NE). Fourth fully expanded  
612 true leaves of *S. viridis* plants from different treatments were first dark-adapted for 20 min  
613 in the LI-6800 chamber to measure maximum PSII efficiency ( $F_v/F_m$ ) under constant CO<sub>2</sub>  
614 partial pressure of 400 ppm in the sample cell, leaf temperature 25°C, leaf VPD 1.5 kPa,  
615 fan speed 10,000 RPM, and flow rate 500 μmol s<sup>-1</sup>. We then performed the light response  
616 curves followed by CO<sub>2</sub> response curves ( $A/C_i$  curve) as described (Supplementary Fig.

617 2). Red-blue actinic light (90%/10%) and 3-6 biological replicates for each treatment were  
618 used for all measurements. We used leaf temperature of 25°C for light and CO<sub>2</sub> response  
619 curves as described in previous publications for *S. viridis* regardless of growth  
620 temperatures<sup>56,98,107–109</sup>. During all measurements, the instrument parameters were  
621 consistent and stable. For CO<sub>2</sub> response curves, all net CO<sub>2</sub> assimilation rates were  
622 corrected with the empty chamber data to count for inevitable and minor LI-6800 leaf  
623 chamber leakiness during the CO<sub>2</sub> response curves following the established  
624 protocols<sup>110</sup>.

625

626 Photosynthetic parameters were calculated as described<sup>62</sup> (see formulas, Supplementary  
627 Table 1). To estimate the true NPQ,  $F_m$  used in the NPQ formula ( $F_m / F_m' - 1$ ) needs to  
628 be the maximum chlorophyll fluorescence in fully relaxed, dark-adapted leaves in which  
629 there is no quenching<sup>62,111</sup>.  $F_m$  and  $F_m'$  are the maximum chlorophyll fluorescence yields  
630 in dark-adapted and light-adapted leaves, respectively<sup>62,111,112</sup>. In ctrl leaves,  $F_m$  could be  
631 reached with 20 min dark-adaptation without further change after that, but HL-treated  
632 leaves needed a much longer recovery period to relax the quenching processes due to  
633 the light-induced photoinhibition (Supplementary Fig. 9a). Because the values of  $F_m$  in  
634 dark-adapted ctrl\_4h leaves were highly consistent among different biological replicates  
635 and reflected the reference level of  $F_m$  (*i.e.*, without stress treatments), we used the mean  
636  $F_m$  of ctrl\_4h leaves as a baseline to calculate NPQ in leaves with different treatments.

637

638 To investigate photosynthetic performance in plants immediately following 4 h of different  
639 treatments (ctrl, HL or HT), we also performed short LI-6800 measurements for 5 min on  
640 each plant immediately after 4 h treatments without dark-adaptation at 400 ppm CO<sub>2</sub> with  
641 indicated leaf temperatures and light intensities (Fig. 8). To estimate photosynthetic  
642 parameters under different treatments as in the growth chambers, the LI-6800 leaf  
643 chamber was set to simulate the condition of different treatments: ctrl (31°C, 200  $\mu\text{mol}$   
644 photons  $\text{m}^{-2} \text{s}^{-1}$  light), HL (31°C, 600  $\mu\text{mol}$  photons  $\text{m}^{-2} \text{s}^{-1}$  light,) or HT (40°C, 200  $\mu\text{mol}$   
645 photons  $\text{m}^{-2} \text{s}^{-1}$  light). The temperature and light refer to the conditions in the LI-6800 leaf  
646 chamber. The light in LI-6800 leaf chamber (90% red and 10% blue) was different from  
647 the white light in the growth chamber, therefore we selected two lights in the LI-6800 leaf

648 chamber that were close to the white lights in growth chambers based on the light  
649 quantification in the red (580-670 nm) and blue (440-540 nm) spectrum range. LI-6800  
650 light intensities of 200 and 600  $\mu\text{mol photons m}^{-2} \text{s}^{-1}$  were also two of the conditions used  
651 in the light response curves with dark-adaptation (Fig. 1c, 8, group 1), allowing for direct  
652 comparison. Individual plants were used for each measurement and replicate.

653

654 The high abundance of PSI in BS chloroplasts of  $C_4$  leaves can affect chlorophyll  
655 fluorescence measurement (up to 50%) and underestimate the PSII efficiency ( $F_v/F_m$ ) and  
656 electron transport rates<sup>113,114</sup>. Thus, our chlorophyll fluorescence data were corrected with  
657  $0.5 F_o$ , which is the mean minimal chlorophyll fluorescence in dark-adapted leaves under  
658 the control condition (ctrl\_4h). The PSII operating efficiency calculated from the corrected  
659 and uncorrected chlorophyll fluorescence data correlated with each other but the  
660 corrected data yielded higher PSII efficiency, with the maximum PSII efficiency in ctrl\_4h  
661 leaves closer to the theoretical values of 0.86<sup>115</sup> (Fig. 1b).

662

### 663 **Modeling of photosynthetic parameters using leaf-level gas exchange information**

664 To model photosynthetic parameters, we used gas exchange data from light response  
665 curves and  $\text{CO}_2$  response curves ( $A/c_i$  curves). The model parameterization and analyses  
666 were conducted in R 3.4.3 Project software® (R Development Core Team 2016). First,  
667 light response curves were fitted as previously described<sup>116</sup>. We fit a non-linear least  
668 squares regression (non-rectangular hyperbola) to estimate photosynthetic parameters  
669 (Supplementary Fig. 4).  $A/c_i$  curves were fitted as previously described<sup>117</sup> to estimate the  
670  $V_{cmax}$  (the maximum rate of carboxylation). Feng et al. (2013) followed the  $C_4$   
671 photosynthesis model using a Bayesian analysis approach<sup>118</sup>. The normality of the data  
672 was verified with the Shapiro-Wilk test. Statistical analysis was performed using Student's  
673 two-tailed t-test with unequal variance by comparing ctrl\_4h with all other conditions.

674

### 675 **RNA isolation**

676 To isolate RNA from leaves, four biological replicates containing two 2-cm mid-leaf  
677 segments from two plants for each time point and treatment were collected from fourth  
678 fully expanded true leaves into screw cap tubes (USA Scientific, 1420-9700) with a

679 grinding bead (Advanced Materials, 4039GM-S050) and immediately frozen in liquid  
680 nitrogen and stored at -80°C. Frozen samples were homogenized using a paint shaker.  
681 RNA was extracted using a Trizol method with all centrifugation at 4°C and 11,000 RCF.  
682 One mL of Trizol Reagent (Invitrogen, 15596018) was added to homogenized leaf tissue  
683 and resuspended, then 200 µL of Chloroform:Isoamyl alcohol (25:1) was added and  
684 vortexed. Tubes were centrifuged for 15 min. 600 µL from the aqueous layer was  
685 transferred to a clean tube with equal volume Chloroform:Isoamyl alcohol, vortexed, and  
686 centrifuged for 5 min. Next, 450 µL of aqueous layer was transferred to 0.7x volume 100%  
687 Isopropanol, mixed well, and chilled for 30 min in -20°C freezer. Samples were centrifuged  
688 for 15 min to pellet RNA. Supernatant was decanted, and RNA pellet was rinsed twice  
689 with ice-cold 75% ethanol with a 2-min centrifugation following each rinse. RNA was dried  
690 in a laminar flow hood until residual ethanol evaporated and was resuspended in 50 µL  
691 of nuclease free H<sub>2</sub>O. RNA was quantified using a NanoDrop and Qubit RNA Broad  
692 Range (BR) Assay Kit (Thermo Fisher Scientific Inc., Q10210) with the Qubit 3.0 machine.  
693 RNA integrity was verified using a Bioanalyzer Nano Assay (Genome Technology Access  
694 Center, Washington University in St. Louis).

695

### 696 **RNA-seq library construction and sequencing**

697 RNA samples were diluted to 200 ng/µL in nuclease free H<sub>2</sub>O for a total of 1 µg RNA.  
698 Libraries were generated with the Quantseq 3' mRNA-seq library prep kit FWD for Illumina  
699 (Lexogen, 015.96). Libraries were generated according to manufacturer's instructions.  
700 Cycle count for library amplification for 1 µg mRNA was tested using the PCR add-on kit  
701 for Illumina (Lexogen, 020.96). qPCR was performed and a cycle count of 13 was  
702 determined for the amplification of all libraries. For library amplification, the Lexogen i5 6  
703 nt Dual Indexing Add-on Kit (5001-5004) (Lexogen, 047.4x96) was used in addition to the  
704 standard kit to allow all libraries to have a unique combination of i5 and i7 indices. All  
705 libraries were quantified using Qubit dsDNA High Sensitivity (HS) Assay Kit (Thermo  
706 Fisher Scientific Inc., Q32854) with the Qubit 3.0 machine. Prepared libraries were pooled  
707 to equimolar concentrations based on Qubit assay reads. Pooled libraries were submitted  
708 to Novogene to be sequenced on the HiSeq4000 platform (Illumina) with paired end, 150  
709 bp reads.

710

## 711 **Mapping and transcript quantification**

712 Single-end reads were trimmed and quality-checked using Trim Galore (version 0.6.2).  
713 Trimmed reads from each library were mapped and processed for transcript quantification  
714 using Salmon (version 1.1.0) in quasi-mapping mode with a transcriptome index built from  
715 the *S. viridis* transcript and genome files (Sviridis\_311\_v2; Phytozome v12.1)<sup>42</sup>. Salmon  
716 outputs were imported into R using the Bioconductor package tximport (1.16.0) to extract  
717 gene-level expression values represented by transcript per million (TPM) for each gene  
718 across every time point, tissue, and treatment group sampled. Principal component  
719 analysis was performed with TPM normalized read counts of all genes using the R  
720 package FactoMineR<sup>119</sup>.

721

## 722 **Differential expression analysis**

723 Genes that met minimum read count cutoffs of at least 10 raw reads in at least 10% of  
724 samples (14,302 genes) were included in differential expression analysis using DeSeq2,  
725 FDR < 0.05<sup>120</sup>. HL or HT treatment time points were compared to the control condition  
726 from the same time point. Differentially expressed genes between different time points in  
727 either HL or HT were visualized in UpSetR<sup>121</sup>. To identify genes in key pathways of  
728 interest in *S. viridis*, we used the MapMan annotations for the closely related *S. italica*  
729 ([RRID:SCR\\_003543](https://rrid.nlm.nih.gov/rrid/SCR_003543)). From the *S. italica* MapMan annotations, we identified the best hit  
730 in *S. viridis* for genes in pathways of interest. We then manually curated these lists based  
731 on relevant literature to obtain genes in pathways of interest (Supplementary Data 6), as  
732 well as to provide further annotation information for genes identified using the MapMan  
733 annotations. We sorted the differentially expressed genes in pathways of interest into fold  
734 change (FC) bins based on their DeSeq2 fold change values and presented their  
735 expression patterns. FC bins were defined as follows: highly induced: FC ≥ 5; moderately  
736 induced: 5 > FC ≥ 2; slightly induced: 2 > FC > 0; not differentially expressed: FC = 0;  
737 slightly repressed: 0 > FC > -2; moderately repressed: -2 ≥ FC > -5; highly repressed: FC  
738 ≤ -5. Heatmaps of pathways of interest were generated using the R package pheatmap  
739 (version 1.0.12. <https://CRAN.R-project.org/package=pheatmap>).

740



741 **ABA quantification**

742 Leaf samples of three biological replicates were harvested at 0, 1, 2 and 4 hours of ctrl,  
743 HL, or HT treatment. The fresh leaf weight was immediately measured after harvesting.  
744 The samples were quickly placed in liquid nitrogen and then stored in -80°C freezer until  
745 further processing. Frozen leaf tissue was homogenized and 15 ng of [<sup>2</sup>H<sub>6</sub>]-abscisic acid  
746 was added as an internal standard. Samples were dried to completeness under vacuum.  
747 ABA was resuspended in 200µl of 2% acetic acid in water (v/v) and then centrifuged; an  
748 aliquot was then taken for quantification. Foliar ABA levels were quantified by liquid  
749 chromatography tandem mass spectrometry with an added internal standard using an  
750 Agilent 6400 Series Triple Quadrupole liquid chromatograph associated with a tandem  
751 mass spectrometer according to the previously described methods<sup>122</sup>.

752

753 **Pigment analysis**

754 Three biological replicates of one 2-cm middle leaf segment were collected from fourth  
755 fully expanded true leaves into screw cap tubes (USA Scientific, 1420-9700) with a  
756 grinding bead (Advanced Materials, 4039GM-S050), immediately frozen in liquid  
757 nitrogen, and stored at -80°C. During pigment extraction, 600 µl ice-cold acetone were  
758 added to the samples before they were homogenized in a FastPrep-24 5G (MP  
759 Biomedicals) at 6.5 m/s for 30 s at room temperature. Cell debris were removed by  
760 centrifugation at 21,000 x g for 1 min. The supernatant was filtered through a 4 mm nylon  
761 glass syringe prefilter with 0.45 µm pore size (Thermo Scientific) and analyzed by HPLC.  
762 HPLC analyses were performed on an Agilent 1100 separation module equipped with a  
763 G1315B diode array and a G1231A fluorescence detector; data were collected and  
764 analyzed using Agilent LC Open Lab ChemStation software. Pigment extracts were  
765 separated on a ProntoSIL 200-5 C30, 5.0 µm, 250 mm by 4.6 mm column equipped with  
766 a ProntoSIL 200-5-C30, 5.0 µm, 20 mm by 4.0 mm guard column (Bischoff  
767 Analysentechnik) and gradient conditions as previously described<sup>123</sup>. Assuming  
768 interconversion of the intermediate antheraxanthin between both zeaxanthin and  
769 violaxanthin, the de-epoxidation level can be calculated by (zeaxanthin + 0.5  
770 antheraxanthin) / (violaxanthin + antheraxanthin + zeaxanthin)<sup>124</sup>.

771

## 772 **Transmission electron microscopy (TEM)**

773 *S. viridis* leaves were collected after 4 h of different treatments and prepared for TEM.  
774 Four-millimeter biopsy punches were taken from the middle leaf segments of the fourth  
775 fully expanded leaves and fixed for 2 h in 2% paraformaldehyde and 2% glutaraldehyde  
776 (EM Science, Hatfield, PA, USA) plus 0.1% Tween20 in 0.1 M sodium cacodylate at pH  
777 7.4 at room temp and then at 4°C overnight. Samples were then rinsed 3x in buffer and  
778 fixed in 2% osmium tetroxide (EM Science, Hatfield, PA, USA) in ELGA water for 2 h,  
779 rinsed 3x in ELGA water and placed in 1% uranyl acetate in ELGA water at 4°C overnight  
780 and then at 50°C for 2 h. Next, samples were rinsed 5x in water, dehydrated in a graded  
781 acetone series and embedded in Epon-Araldite (Embed 812, EM Science, Hatfield, PA,  
782 USA). Embedments were trimmed and mounted in the vise-chuck of a Leica Ultracut UCT  
783 ultramicrotome (Leica, Buffalo Grove, IL, USA). Ultrathin sections (~60 to 70 nm) were  
784 cut using a diamond knife (type ultra 35°C; Diatome), mounted on copper grids  
785 (FCFT300-CU-50, VWR, Radnor, PA, USA), and counterstained with lead citrate for 8  
786 min<sup>125</sup>. Samples were imaged with a LEO 912 AB Energy Filter Transmission Electron  
787 Microscope (Zeiss, Oberkochen, Germany). Micrographs were acquired with ITEM  
788 software (ver. 5.2) (Olympus Soft Imaging Solutions GmbH, Germany) with a TRS 2048  
789 x 2048k slow-scan charge-coupled device (CCD) camera (TRÖNDLE  
790 Restlichtverstärkersysteme, Germany). Ninety electron micrographs were quantified for  
791 each experimental treatment using image analysis (FIJI software, National Institutes of  
792 Health) and stereology (Stereology Analyzer version 4.3.3, ADCIS, France). Each TEM  
793 image was acquired at 8,000X magnification and 1.37 nm pixel resolution with arrays of  
794 up to 5X5 tiles using automated Multiple Image Alignment software module (settings:  
795 correlation =1, FFT algorithm, overlap area = linear weighted, movement = emphasize,  
796 and equalize). TEM images were analyzed with Stereology Analyzer software version  
797 4.3.3 to quantify relative volume of various cell parameters including stroma, stroma  
798 lamellae, starch granules, and grana within individual chloroplasts (Supplementary Fig.  
799 11b). Grid type was set as “point” with a sampling step of 500x500 pixels and pattern size  
800 of 15x15 pixels. The percent of relative volume for each parameter was collected after  
801 identifying all grid points within one chloroplast and further analyzed in excel. TEM images  
802 with a magnification of 8K were used in the Fiji (ImageJ) analysis. The images were

803 scaled to 0.7299 pixel/nm in ImageJ before analyzing the chloroplast area, plastoglobuli  
804 area, and grana dimensions. The height of grana margin (positions 1 and 3) and grana  
805 core (position 2) were quantified as described previously<sup>23</sup> (Supplementary Fig. 12d, e).  
806 The “polygon selections” tool was used to quantify the chloroplast and plastoglobuli area  
807 by outlining the target structure. The individual plastoglobuli (PG) size was measured  
808 using ImageJ. All PG in a chloroplast were quantified to get the total PG area per  
809 chloroplast. The “straight” tool was used to quantify grana height and width. The grana  
810 number and PG number were counted manually. Choosing the correct statistical test to  
811 reflect the quantified data is essential in making conclusions. Three different statistical  
812 tests were used to find the significance of p-values. The negative binomial test was used  
813 for counting data that followed a negative binomial distribution. The Kolmogorov-Smirnov  
814 test was used for relative volume data since it is commonly used to find significance  
815 between data in a form of ratios. A two-tailed t-test with unequal variance was used for  
816 all other data that followed a normal distribution. All three statistical tests compared the  
817 treatment conditions to the ctrl conditions of the same cell type. Each treatment had three  
818 biological replicates and a total of 90~120 images of each treatment were analyzed.

819

## 820 **Starch quantification**

821 To isolate starch from leaves, three biological replicates of 2-cm mid-leaf segments were  
822 collected from fourth fully expanded true leaves into screw cap tubes (USA Scientific,  
823 1420-9700) with a grinding bead (Advanced Materials, 4039GM-S050) and immediately  
824 frozen in liquid nitrogen and stored at -80°C. Frozen samples were homogenized using a  
825 paint shaker. For starch quantification, leaves decolorized by 80% ethanol and starch  
826 concentration was subsequently measured using a starch assay kit (Megazyme, K-TSTA-  
827 100A).

828

## 829 **MultispeQ measurement**

830 A MultispeQ<sup>61</sup> v2.0 was used to measure chlorophyll fluorescence parameters and  
831 electrochromic shift (ECS) in *S. viridis* leaves at the start or after 4 h treatments of ctrl,  
832 HL, or HT. ECS results from light-dark-transition induced electric field effects on  
833 carotenoid absorbance bands<sup>62,126</sup> and is a useful tool to monitor proton fluxes and the

834 transthylakoid proton motive force (*pmf*) *in vivo*<sup>63,64</sup>. Light drives photosynthetic electron  
835 transport along the thylakoid membrane and proton fluxes across the thylakoid  
836 membrane. Protons flux into the thylakoid through H<sub>2</sub>O oxidation at PSII and plastoquinol  
837 oxidation at cytochrome *b<sub>6</sub>f* complex; protons flux out of the thylakoid mainly through ATP  
838 synthase to make ATP, which is driven by the transthylakoid *pmf*<sup>63,64</sup>. The total amplitude  
839 of ECS signal during the light-dark-transition, ECS<sub>t</sub>, represents the transthylakoid *pmf*.  
840 The decay time constant of light-dark-transition induced ECS signal, τ<sub>ECS</sub>, is inversely  
841 proportional to proton conductivity ( $g_{H^+} = 1 / \tau_{ECS}$ ), which is proportional to the aggregate  
842 conductivity (or permeability) of the thylakoid membrane to protons and largely dependent  
843 on the activity of ATP synthase<sup>62</sup>. The proton flux rates, v<sub>H+</sub>, calculated by ECS<sub>t</sub> / τ<sub>ECS</sub>, is  
844 the initial decay rate of the ECS signal during the light-dark-transition and reflects the rate  
845 of proton translocation by the entire electron transfer chain, usually predominantly through  
846 the ATP synthase<sup>62</sup>. ECS was measured using MultispeQ and the dark interval relaxation  
847 kinetics with a modified Photosynthesis RIDES protocol at light intensities of 250, 500,  
848 and 1000 μmol photons m<sup>-2</sup> s<sup>-1</sup>. The MultispeQ v2.0 was modified with a light guide mask  
849 to improve measurements on smaller leaves. Parameters at the different light intensities  
850 were measured sequentially on the middle segment of a fourth fully expanded true leaf at  
851 room temperature with no dark adaptation prior to measurements. The estimated NPQ,  
852 NPQ<sub>(T)</sub>, was measured by MultispeQ based on a method that does not require a dark-  
853 adapted state of the leaf for determination of F<sub>m</sub><sup>59</sup>. NPQ<sub>(T)</sub> uses the minimal fluorescence  
854 (F<sub>o</sub>' ) and maximal fluorescence (F<sub>m</sub>' ) in light-adapted leaves to estimate NPQ. Statistical  
855 significance was assigned with a two-tailed t-test assuming unequal variance.

856

## 857 **Statistics and reproducibility**

858 All data presented had at least 3 biological replicates. Detailed information about statistics  
859 analysis were described for each method above.

860

## 861 **Data availability**

862 The datasets analyzed in this paper are included in this published article and  
863 supplementary information files. Other information is available from the corresponding  
864 author on request.

865

## 866 **ACKNOWLEDGEMENTS**

867 The research was supported by the Defense Advanced Research Projects Agency  
868 (DARPA) (HR001118C0137 to R.Z., A.E., D.N., and R.V.) and start-up funding from  
869 Donald Danforth Plant Science Center (DDPSC) to R.Z. E.M. was supported by the  
870 William H. Danforth Fellowship in Plant Sciences and Washington University in St. Louis.  
871 D.P. was supported by the Berkeley Fellowship and the NSF Graduate Research  
872 Fellowship Program Grant DGE 1752814. O.D. was supported by the Deutsche  
873 Forschungsgemeinschaft (DFG) - Project number 427925948. K.K.N. is an investigator  
874 of the Howard Hughes Medical Institute. We would like to thank Dr. Helmut Kirchhoff and  
875 Dr. Charles Pignon for helpful discussion about the TEM data and LI-6800 data,  
876 respectively. We also want to thank Drs. Blake Meyers, Sona Pandey, and Ivan Baxter  
877 for their valuable feedback about the manuscript. We acknowledge imaging support from  
878 the Advanced Bioimaging Laboratory (RRID:SCR\_018951) at DDPSC and usage of the  
879 LEO 912AB Energy Filter TEM acquired through a National Science Foundation (NSF)  
880 Major Research Instrumentation grant (DBI-0116650). We also acknowledge the use of  
881 the Metabolite Profiling facility of the Bindley Bioscience Center, a core facility of the  
882 National Institute of Health-funded Indiana Clinical and Translational Sciences Institute,  
883 for assisting in the quantification of ABA levels. We appreciate the DDPSC Plant Growth  
884 Facilities for growth chamber reservation and taking care of our plants. DARPA approved  
885 the paper for Public Release, Distribution Unlimited.

886

## 887 **AUTHOR CONTRIBUTIONS**

888 R.Z. supervised the whole project. R.Z. and C.M.A. designed and planned all the  
889 experiments. C.M.A. led the project, performed and analyzed all LI-6800 data, extracted  
890 RNA and prepared the RNA-seq library, and led sample harvest for pigment analysis.  
891 C.M.A. and E.B. grew all plants needed for the project. T.J.A. provided insight to optimize  
892 gas exchange and chlorophyll fluorescence measurements in *S. viridis* using the LI-6800.  
893 T.T. and R.V. performed modeling of the leaf-level gas exchange data. N.Z., E.B. and  
894 K.J.C. performed TEM analysis. N.Z. quantified starch using assay kits. W.M. helped

895 harvest leaf tissues and performed MultispeQ measurements. E.B. harvested leaves for  
896 ABA measurements and S.A.M.M. performed ABA analyses. D.P., O.D., and K.K.N.  
897 performed leaf pigment analysis by HPLC. M.B. and A.L.E. provided insight for RNA-seq  
898 library preparation. J.Y. and A.L.E. preprocessed RNA-seq data. E.M. led RNA-seq data  
899 analysis and generated all the heatmaps. S.P. and R.Z. identified ABA-related genes in  
900 *S. viridis*. E.M. identified all other genes used for the heatmaps. J.B. provided suggestions  
901 for statistical analysis. M.W. and D.A.N. helped plan, coordinate, and discuss the RNA-  
902 seq experiments. R.Z., C.M.A., and E.M. led the writing of the manuscript with the  
903 contribution of all other co-authors. All the authors discussed the results, contributed to  
904 data interpretation, and helped revise the manuscript.

905

#### 906 **Competing interests**

907 The authors declare no competing interests.

908

#### 909 **Supplementary information**

910 **Supplementary Table 1:** Formulas to calculate photosynthetic parameters.

911

#### 912 **Supplementary Data Files**

913 **Supplementary Data 1:** Normalized read counts in Transcripts Per Million (TPM) for all  
914 genes in all time points and biological replicates. Annotation information includes the *S.*  
915 *viridis* provisional defline, *A. thaliana* and *O. sativa* best hits and deflines from the Joint  
916 Genome Institute bulk annotation information.

917

918 **Supplementary Data 2:** Differential expression data for all genes that were significantly  
919 differentially expressed in at least one time point and condition (DeSeq2, FDR < 0.05).  
920 Annotation information includes the *S. viridis* provisional defline, *A. thaliana* and *O. sativa*  
921 best hits and deflines from the Joint Genome Institute bulk annotation information.

922

923 **Supplementary Data 3:** Genes up-regulated or down-regulated at all time points in high  
924 light or high temperature conditions. Annotation information includes the *S. viridis*

925 provisional defline, *A. thaliana* and *O. sativa* best hits and deflines from the Joint Genome  
926 Institute bulk annotation information.

927

928 **Supplementary Data 4:** Overlapping differentially expressed genes between high light  
929 and high temperature conditions. Genes differentially expressed in at least one time point  
930 were included in lists of up- and down-regulated genes in each condition. Annotation  
931 information includes the *S. viridis* provisional defline, *A. thaliana* and *O. sativa* best hits  
932 and deflines from the Joint Genome Institute bulk annotation information.

933

934 **Supplementary Data 5:** Genes highly induced or highly repressed ( $FC \geq 5$ , or  $\leq -5$ ) in  
935 both the high light and high temperature treatments during at least one time point.  
936 Annotation information includes the *S. viridis* provisional defline, *A. thaliana* and *O. sativa*  
937 best hits and deflines from the Joint Genome Institute bulk annotation information.  
938 Additionally, heat tolerance genes identified in maize with homologs in *S. viridis*.

939

940 **Supplementary Data 6:** *S. viridis* v2.1 gene information used to generate heatmaps of  
941 pathways of interest.

942

943 **Supplementary figure 1-14**

944

## 945 **References**

- 946 1. Wang, L., Peterson, R. B. & Brutnell, T. P. Regulatory mechanisms underlying C<sub>4</sub>  
947 photosynthesis: Tansley review. *New Phytologist* **190**, 9–20 (2011).
- 948 2. Huang, P., Shyu, C., Coelho, C. P., Cao, Y. & Brutnell, T. P. *Setaria viridis* as a  
949 Model System to Advance Millet Genetics and Genomics. *Front. Plant Sci.* **7**,  
950 (2016).
- 951 3. von Caemmerer, S. & Furbank, R. T. Strategies for improving C<sub>4</sub> photosynthesis.  
952 *Current Opinion in Plant Biology* **31**, 125–134 (2016).

- 953 4. Sage, R. F. The evolution of C<sub>4</sub> photosynthesis. *New Phytologist* **161**, 341–370  
954 (2004).
- 955 5. Blätke, M.-A. & Bräutigam, A. Evolution of C<sub>4</sub> photosynthesis predicted by  
956 constraint-based modelling. *eLife* **8**, e49305 (2019).
- 957 6. Yamori, W., Hikosaka, K. & Way, D. A. Temperature response of photosynthesis in  
958 C<sub>3</sub>, C<sub>4</sub>, and CAM plants: temperature acclimation and temperature adaptation.  
959 *Photosynth Res* **119**, 101–117 (2014).
- 960 7. Zhao, C. *et al.* Temperature increase reduces global yields of major crops in four  
961 independent estimates. *PNAS* **114**, 9326–9331 (2017).
- 962 8. Tack, J., Lingenfelser, J. & Jagadish, S. V. K. Disaggregating sorghum yield  
963 reductions under warming scenarios exposes narrow genetic diversity in US  
964 breeding programs. *PNAS* **114**, 9296–9301 (2017).
- 965 9. Maai, E., Nishimura, K., Takisawa, R. & Nakazaki, T. Light stress-induced  
966 chloroplast movement and midday depression of photosynthesis in sorghum  
967 leaves. *Plant Production Science* **23**, 172–181 (2020).
- 968 10. Dietz, K.-J. Efficient high light acclimation involves rapid processes at multiple  
969 mechanistic levels. *J Exp Bot* **66**, 2401–2414 (2015).
- 970 11. Huang, J., Zhao, X. & Chory, J. The Arabidopsis Transcriptome Responds  
971 Specifically and Dynamically to High Light Stress. *Cell Reports* **29**, 4186–4199.e3  
972 (2019).
- 973 12. Galvez-Valdivieso, G. *et al.* The High Light Response in Arabidopsis Involves ABA  
974 Signaling between Vascular and Bundle Sheath Cells. *The Plant Cell* **21**, 2143–  
975 2162 (2009).



- 976 13. Gollan, P. J. & Aro, E.-M. Photosynthetic signalling during high light stress and  
977 recovery: targets and dynamics. *Philos Trans R Soc Lond B Biol Sci* **375**,  
978 20190406 (2020).
- 979 14. Takahashi, S. Photoprotection in plants: a new light on photosystem II damage. **16**,  
980 8 (2011).
- 981 15. Kirchhoff, H. Structural changes of the thylakoid membrane network induced by  
982 high light stress in plant chloroplasts. *Phil. Trans. R. Soc. B* **369**, 20130225 (2014).
- 983 16. Rochaix, J.-D. Regulation and Dynamics of the Light-Harvesting System. *Annual*  
984 *Review of Plant Biology* **65**, 287–309 (2014).
- 985 17. Müller, P., Li, X.-P. & Niyogi, K. K. Non-Photochemical Quenching. A Response to  
986 Excess Light Energy. *Plant Physiol.* **125**, 1558–1566 (2001).
- 987 18. Murchie, E. H. & Ruban, A. V. Dynamic non-photochemical quenching in plants:  
988 from molecular mechanism to productivity. *Plant J* **101**, 885–896 (2020).
- 989 19. Ma, Y. *et al.* Molecular Mechanism for the Regulation of ABA Homeostasis During  
990 Plant Development and Stress Responses. *IJMS* **19**, 3643 (2018).
- 991 20. Jahns, P., Latowski, D. & Strzalka, K. Mechanism and regulation of the violaxanthin  
992 cycle: The role of antenna proteins and membrane lipids. *Biochimica et Biophysica*  
993 *Acta (BBA) - Bioenergetics* **1787**, 3–14 (2009).
- 994 21. Nilkens, M. *et al.* Identification of a slowly inducible zeaxanthin-dependent  
995 component of non-photochemical quenching of chlorophyll fluorescence generated  
996 under steady-state conditions in Arabidopsis. *Biochim Biophys Acta* **1797**, 466–475  
997 (2010).

- 998 22. Herbstová, M., Tietz, S., Kinzel, C., Turkina, M. V. & Kirchhoff, H. Architectural  
999 switch in plant photosynthetic membranes induced by light stress. *PNAS* **109**,  
1000 20130–20135 (2012).
- 1001 23. Yoshioka-Nishimura, M. *et al.* Quality Control of Photosystem II: Direct Imaging of  
1002 the Changes in the Thylakoid Structure and Distribution of FtsH Proteases in  
1003 Spinach Chloroplasts under Light Stress. *Plant Cell Physiol* **55**, 1255–1265 (2014).
- 1004 24. Flannery, S. E. *et al.* Developmental acclimation of the thylakoid proteome to light  
1005 intensity in Arabidopsis. *The Plant Journal n/a*, (2020).
- 1006 25. Mittler, R., Finka, A. & Goloubinoff, P. How do plants feel the heat? *Trends in*  
1007 *Biochemical Sciences* **37**, 118–125 (2012).
- 1008 26. Zhang, R. & Sharkey, T. D. Photosynthetic electron transport and proton flux under  
1009 moderate heat stress. *Photosynth Res* **100**, 29–43 (2009).
- 1010 27. Janni, M. *et al.* Molecular and genetic bases of heat stress responses in crop plants  
1011 and breeding for increased resilience and productivity. *J Exp Bot* **71**, 3780–3802  
1012 (2020).
- 1013 28. Qu, A.-L., Ding, Y.-F., Jiang, Q. & Zhu, C. Molecular mechanisms of the plant heat  
1014 stress response. *Biochemical and Biophysical Research Communications* **432**,  
1015 203–207 (2013).
- 1016 29. Kotak, S. *et al.* Complexity of the heat stress response in plants. *Current Opinion in*  
1017 *Plant Biology* **10**, 310–316 (2007).
- 1018 30. Sharkey, T. D. Effects of moderate heat stress on photosynthesis: importance of  
1019 thylakoid reactions, rubisco deactivation, reactive oxygen species, and

- 1020 thermotolerance provided by isoprene. *Plant, Cell & Environment* **28**, 269–277  
1021 (2005).
- 1022 31. Zhang, R., Wise, R. R., Struck, K. R. & Sharkey, T. D. Moderate heat stress of  
1023 *Arabidopsis thaliana* leaves causes chloroplast swelling and plastoglobule  
1024 formation. *Photosynth Res* **105**, 123–134 (2010).
- 1025 32. van Wijk, K. J. & Kessler, F. Plastoglobuli: Plastid Microcompartments with  
1026 Integrated Functions in Metabolism, Plastid Developmental Transitions, and  
1027 Environmental Adaptation. *Annu. Rev. Plant Biol.* **68**, 253–289 (2017).
- 1028 33. Scharf, K.-D., Berberich, T., Ebersberger, I. & Nover, L. The plant heat stress  
1029 transcription factor (Hsf) family: structure, function and evolution. *Biochim. Biophys.*  
1030 *Acta* **1819**, 104–119 (2012).
- 1031 34. Al-Whaibi, M. H. Plant heat-shock proteins: A mini review. *Journal of King Saud*  
1032 *University - Science* **23**, 139–150 (2011).
- 1033 35. Henry, C. *et al.* Sugar sensing responses to low and high light in leaves of the C<sub>4</sub>  
1034 model grass *Setaria viridis*. *J Exp Bot* **71**, 1039–1052 (2020).
- 1035 36. Crafts-Brandner, S. J. & Salvucci, M. E. Sensitivity of Photosynthesis in a C<sub>4</sub> Plant,  
1036 Maize, to Heat Stress. *Plant Physiol.* **129**, 1773–1780 (2002).
- 1037 37. Boyd, R. A., Gandin, A. & Cousins, A. B. Temperature Responses of C<sub>4</sub>  
1038 Photosynthesis: Biochemical Analysis of Rubisco, Phosphoenolpyruvate  
1039 Carboxylase, and Carbonic Anhydrase in *Setaria viridis*1[OPEN]. *Plant Physiol*  
1040 **169**, 1850–1861 (2015).
- 1041 38. Sonawane, B. V., Sharwood, R. E., von Caemmerer, S., Whitney, S. M. &  
1042 Ghannoum, O. Short-term thermal photosynthetic responses of C<sub>4</sub> grasses are

- 1043 independent of the biochemical subtype. *Journal of Experimental Botany* **68**, 5583–  
1044 5597 (2017).
- 1045 39. Yin, X., van der Putten, P. E. L., Driever, S. M. & Struik, P. C. Temperature  
1046 response of bundle-sheath conductance in maize leaves. *J Exp Bot* **67**, 2699–2714  
1047 (2016).
- 1048 40. Shi, J., Yan, B., Lou, X., Ma, H. & Ruan, S. Comparative transcriptome analysis  
1049 reveals the transcriptional alterations in heat-resistant and heat-sensitive sweet  
1050 maize (*Zea mays* L.) varieties under heat stress. *BMC Plant Biology* **17**, 26 (2017).
- 1051 41. Frey, F. P., Urbany, C., Hüttel, B., Reinhardt, R. & Stich, B. Genome-wide  
1052 expression profiling and phenotypic evaluation of European maize inbreds at  
1053 seedling stage in response to heat stress. *BMC Genomics* **16**, 123 (2015).
- 1054 42. Mamidi, S. *et al.* A genome resource for green millet *Setaria viridis* enables  
1055 discovery of agronomically valuable loci. *Nature Biotechnology* **38**, 1203–1210  
1056 (2020).
- 1057 43. Thielen, P. M. *et al.* Reference Genome for the Highly Transformable *Setaria viridis*  
1058 ME034V. *G3: Genes, Genomes, Genetics* **10**, 3467–3478 (2020).
- 1059 44. Bellafiore, S., Barneche, F., Peltier, G. & Rochaix, J.-D. State transitions and light  
1060 adaptation require chloroplast thylakoid protein kinase STN7. *Nature* **433**, 892–895  
1061 (2005).
- 1062 45. Pribil, M., Pesaresi, P., Hertle, A., Barbato, R. & Leister, D. Role of Plastid Protein  
1063 Phosphatase TAP38 in LHCII Dephosphorylation and Thylakoid Electron Flow.  
1064 *PLOS Biology* **8**, e1000288 (2010).

- 1065 46. Rantala, S. *et al.* PGR5 and NDH-1 systems do not function as protective electron  
1066 acceptors but mitigate the consequences of PSI inhibition. *Biochimica et*  
1067 *Biophysica Acta (BBA) - Bioenergetics* **1861**, 148154 (2020).
- 1068 47. Hertle, A. P. *et al.* PGRL1 Is the Elusive Ferredoxin-Plastoquinone Reductase in  
1069 Photosynthetic Cyclic Electron Flow. *Molecular Cell* **49**, 511–523 (2013).
- 1070 48. Bhat, J. Y., Thieulin-Pardo, G., Hartl, F. U. & Hayer-Hartl, M. Rubisco Activases:  
1071 AAA+ Chaperones Adapted to Enzyme Repair. *Front. Mol. Biosci.* **4**, (2017).
- 1072 49. Mueller-Cajar, O. The Diverse AAA+ Machines that Repair Inhibited Rubisco Active  
1073 Sites. *Front. Mol. Biosci.* **4**, 31 (2017).
- 1074 50. Dellero, Y. *et al.* Decreased glycolate oxidase activity leads to altered carbon  
1075 allocation and leaf senescence after a transfer from high CO<sub>2</sub> to ambient air in  
1076 *Arabidopsis thaliana*. *EXBOTJ* **67**, 3149–3163 (2016).
- 1077 51. Kerchev, P. *et al.* Lack of GLYCOLATE OXIDASE1, but Not GLYCOLATE  
1078 OXIDASE2, Attenuates the Photorespiratory Phenotype of CATALASE2-Deficient  
1079 *Arabidopsis*. *Plant Physiol.* **171**, 1704–1719 (2016).
- 1080 52. Modde, K. *et al.* High serine:glyoxylate aminotransferase activity lowers leaf  
1081 daytime serine levels, inducing the phosphoserine pathway in *Arabidopsis*. *J Exp*  
1082 *Bot* **68**, 643–656 (2017).
- 1083 53. Schwarte, S. & Bauwe, H. Identification of the Photorespiratory 2-Phosphoglycolate  
1084 Phosphatase, PGLP1, in *Arabidopsis*. *Plant Physiology* **144**, 1580–1586 (2007).
- 1085 54. Liu, Y., Guérard, F., Hodges, M. & Jossier, M. Phosphomimetic T335D Mutation of  
1086 Hydroxypyruvate Reductase 1 Modifies Cofactor Specificity and Impacts  
1087 *Arabidopsis* Growth in Air. *Plant Physiology* **183**, 194–205 (2020).

- 1088 55. Walker, B. J., South, P. F. & Ort, D. R. Physiological evidence for plasticity in  
1089 glycolate/glycerate transport during photorespiration. *Photosynth Res* **129**, 93–103  
1090 (2016).
- 1091 56. Osborn, H. L. *et al.* Effects of reduced carbonic anhydrase activity on CO<sub>2</sub>  
1092 assimilation rates in *Setaria viridis*: a transgenic analysis. *EXBOTJ* **68**, 299–310  
1093 (2017).
- 1094 57. Hasanuzzaman, M. *et al.* Reactive Oxygen Species and Antioxidant Defense in  
1095 Plants under Abiotic Stress: Revisiting the Crucial Role of a Universal Defense  
1096 Regulator. *Antioxidants* **9**, 681 (2020).
- 1097 58. John, C. R., Smith-Unna, R. D., Woodfield, H., Covshoff, S. & Hibberd, J. M.  
1098 Evolutionary Convergence of Cell-Specific Gene Expression in Independent  
1099 Lineages of C<sub>4</sub> Grasses. *Plant Physiology* **165**, 62–75 (2014).
- 1100 59. Tietz, S., Hall, C. C., Cruz, J. A. & Kramer, D. M. NPQ<sub>(T)</sub>: a chlorophyll  
1101 fluorescence parameter for rapid estimation and imaging of non-photochemical  
1102 quenching of excitons in photosystem-II-associated antenna complexes: New,  
1103 rapid probe of non-photochemical quenching. *Plant, Cell & Environment* **40**, 1243–  
1104 1255 (2017).
- 1105 60. Li, Z. *et al.* Lutein Accumulation in the Absence of Zeaxanthin Restores  
1106 Nonphotochemical Quenching in the *Arabidopsis thaliana npq1* Mutant. *Plant Cell*  
1107 **21**, 1798–1812 (2009).
- 1108 61. Kuhlert, S. *et al.* MultispeQ Beta: a tool for large-scale plant phenotyping  
1109 connected to the open PhotosynQ network. *R. Soc. open sci.* **3**, 160592 (2016).

- 1110 62. Baker, N. R., Harbinson, J. & Kramer, D. M. Determining the limitations and  
1111 regulation of photosynthetic energy transduction in leaves. *Plant, Cell &*  
1112 *Environment* **30**, 1107–1125 (2007).
- 1113 63. Kramer, D. M., Avenson, T. J. & Edwards, G. E. Dynamic flexibility in the light  
1114 reactions of photosynthesis governed by both electron and proton transfer  
1115 reactions. *Trends in Plant Science* **9**, 349–357 (2004).
- 1116 64. Cruz, J. A. Plasticity in light reactions of photosynthesis for energy production and  
1117 photoprotection. *Journal of Experimental Botany* **56**, 395–406 (2004).
- 1118 65. Delorge, I., Janiak, M., Carpentier, S. & Van Dijck, P. Fine tuning of trehalose  
1119 biosynthesis and hydrolysis as novel tools for the generation of abiotic stress  
1120 tolerant plants. *Front. Plant Sci.* **5**, (2014).
- 1121 66. Skryhan, K., Gurrieri, L., Sparla, F., Trost, P. & Blennow, A. Redox Regulation of  
1122 Starch Metabolism. *Front. Plant Sci.* **9**, 1344 (2018).
- 1123 67. Weise, S. E., van Wijk, K. J. & Sharkey, T. D. The role of transitory starch in C<sub>3</sub>,  
1124 CAM, and C<sub>4</sub> metabolism and opportunities for engineering leaf starch  
1125 accumulation. *Journal of Experimental Botany* **62**, 3109–3118 (2011).
- 1126 68. Järvi, S., Suorsa, M. & Aro, E.-M. Photosystem II repair in plant chloroplasts —  
1127 Regulation, assisting proteins and shared components with photosystem II  
1128 biogenesis. *Biochimica et Biophysica Acta (BBA) - Bioenergetics* **1847**, 900–909  
1129 (2015).
- 1130 69. Puthiyaveetil, S. *et al.* Compartmentalization of the protein repair machinery in  
1131 photosynthetic membranes. *PNAS* **111**, 15839–15844 (2014).

- 1132 70. Balfagón, D. *et al.* Jasmonic Acid Is Required for Plant Acclimation to a  
1133 Combination of High Light and Heat Stress. *Plant Physiology* **181**, 1668–1682  
1134 (2019).
- 1135 71. Jang, J. C. & Sheen, J. Sugar sensing in higher plants. *The Plant Cell* **6**, 1665–  
1136 1679 (1994).
- 1137 72. Lastdrager, J., Hanson, J. & Smeekens, S. Sugar signals and the control of plant  
1138 growth and development. *9* (2014).
- 1139 73. Tomé, F. *et al.* The low energy signaling network. *Front. Plant Sci.* **5**, (2014).
- 1140 74. Li, L. & Sheen, J. Dynamic and diverse sugar signaling. *Current Opinion in Plant*  
1141 *Biology* **33**, 116–125 (2016).
- 1142 75. Baena-González, E. & Hanson, J. Shaping plant development through the SnRK1–  
1143 TOR metabolic regulators. *Current Opinion in Plant Biology* **35**, 152–157 (2017).
- 1144 76. Lunn, J. E., Delorge, I., Figueroa, C. M., Van Dijck, P. & Stitt, M. Trehalose  
1145 metabolism in plants. *Plant J* **79**, 544–567 (2014).
- 1146 77. Figueroa, C. M. & Lunn, J. E. A Tale of Two Sugars: Trehalose 6-Phosphate and  
1147 Sucrose. *Plant Physiology* **172**, 7–27 (2016).
- 1148 78. Ponnu, J., Wahl, V. & Schmid, M. Trehalose-6-Phosphate: Connecting Plant  
1149 Metabolism and Development. *Front. Plant Sci.* **2**, (2011).
- 1150 79. Kolbe, A. *et al.* Trehalose 6-phosphate regulates starch synthesis via  
1151 posttranslational redox activation of ADP-glucose pyrophosphorylase. *PNAS* **102**,  
1152 11118–11123 (2005).



- 1153 80. Fryer, M. J. *et al.* Control of *Ascorbate Peroxidase 2* expression by hydrogen  
1154 peroxide and leaf water status during excess light stress reveals a functional  
1155 organisation of *Arabidopsis* leaves. *The Plant Journal* **33**, 691–705 (2003).
- 1156 81. Staneloni, R. J., Rodriguez-Batiller, M. J. & Casal, J. J. Abscisic Acid, High-Light,  
1157 and Oxidative Stress Down-Regulate a Photosynthetic Gene via a Promoter Motif  
1158 Not Involved in Phytochrome-Mediated Transcriptional Regulation. *Molecular Plant*  
1159 **1**, 75–83 (2008).
- 1160 82. Endo, A. *et al.* Drought Induction of *Arabidopsis* 9-cis-Epoxy-carotenoid  
1161 Dioxygenase Occurs in Vascular Parenchyma Cells. *Plant Physiol.* **147**, 1984–  
1162 1993 (2008).
- 1163 83. Tan, B.-C. *et al.* Molecular characterization of the *Arabidopsis* 9 -cis  
1164 epoxy-carotenoid dioxygenase gene family. *The Plant Journal* **35**, 44–56 (2003).
- 1165 84. Saito, S. *et al.* *Arabidopsis* CYP707As Encode (+)-Abscisic Acid 8'-Hydroxylase, a  
1166 Key Enzyme in the Oxidative Catabolism of Abscisic Acid. *Plant Physiology* **134**,  
1167 1439–1449 (2004).
- 1168 85. Lee, K. H. *et al.* Activation of Glucosidase via Stress-Induced Polymerization  
1169 Rapidly Increases Active Pools of Abscisic Acid. *Cell* **126**, 1109–1120 (2006).
- 1170 86. Bukhov, N. G., Wiese, C., Neimanis, S. & Heber, U. Heat sensitivity of chloroplasts  
1171 and leaves: Leakage of protons from thylakoids and reversible activation of cyclic  
1172 electron transport. *Photosynthesis Research* **59**, 81–93 (1999).
- 1173 87. Schrader, SM, S., Wise, R., Wacholtz, W., ORT, D. & Sharkey, T. Thylakoid  
1174 membrane responses to moderately high leaf temperature in Pima cotton. *Plant,*  
1175 *Cell & Environment* **27**, 725–735 (2004).

- 1176 88. Shivhare, D. & Mueller-Cajar, O. In Vitro Characterization of Thermostable CAM  
1177 Rubisco Activase Reveals a Rubisco Interacting Surface Loop. *Plant Physiol.* **174**,  
1178 1505–1516 (2017).
- 1179 89. Wang, D. *et al.* Two Rubisco activase isoforms may play different roles in  
1180 photosynthetic heat acclimation in the rice plant. *Physiologia Plantarum* **139**, 55–67  
1181 (2010).
- 1182 90. Scafaro, A. P., Haynes, P. A. & Atwell, B. J. Physiological and molecular changes  
1183 in *Oryza meridionalis* Ng., a heat-tolerant species of wild rice. *Journal of*  
1184 *Experimental Botany* **61**, 191–202 (2010).
- 1185 91. Kim, S. Y., Slattery, R. A. & Ort, D. R. A role for differential Rubisco activase  
1186 isoform expression in C4 bioenergy grasses at high temperature. *GCB Bioenergy*  
1187 **13**, 211–223 (2020).
- 1188 92. Schuster, W. S. & Monson, R. K. An examination of the advantages of C<sub>3</sub>-C<sub>4</sub>  
1189 intermediate photosynthesis in warm environments. *Plant Cell and Environment* **13**,  
1190 903–912 (1990).
- 1191 93. Yamori, W. & Shikanai, T. Physiological Functions of Cyclic Electron Transport  
1192 Around Photosystem I in Sustaining Photosynthesis and Plant Growth. *Annu. Rev.*  
1193 *Plant Biol.* **67**, 81–106 (2016).
- 1194 94. Johnson, G. N. Physiology of PSI cyclic electron transport in higher plants.  
1195 *Biochimica et Biophysica Acta (BBA) - Bioenergetics* **1807**, 384–389 (2011).
- 1196 95. He, Y. *et al.* Increasing cyclic electron flow is related to Na<sup>+</sup> sequestration into  
1197 vacuoles for salt tolerance in soybean. *J Exp Bot* **66**, 6877–6889 (2015).

- 1198 96. Huang, W., Yang, S.-J., Zhang, S.-B., Zhang, J.-L. & Cao, K.-F. Cyclic electron flow  
1199 plays an important role in photoprotection for the resurrection plant  
1200 *Parabearufescens* under drought stress. *Planta* **235**, 819–828 (2012).
- 1201 97. Nakamura, N., Iwano, M., Havaux, M., Yokota, A. & Munekage, Y. N. Promotion of  
1202 cyclic electron transport around photosystem I during the evolution of NADP-malic  
1203 enzyme-type C<sub>4</sub> photosynthesis in the genus *Flaveria*. *New Phytol* **199**, 832–842  
1204 (2013).
- 1205 98. Essemine, J. *et al.* Photosynthetic and transcriptomic responses of two C<sub>4</sub> grass  
1206 species with different NaCl tolerance. *Journal of Plant Physiology* **253**, 153244  
1207 (2020).
- 1208 99. Kaldenhoff, R. Mechanisms underlying CO<sub>2</sub> diffusion in leaves. *Current Opinion in*  
1209 *Plant Biology* **15**, 276–281 (2012).
- 1210 100. Weber, A. P. & von Caemmerer, S. Plastid transport and metabolism of C<sub>3</sub> and C<sub>4</sub>  
1211 plants—comparative analysis and possible biotechnological exploitation. *Current*  
1212 *Opinion in Plant Biology* **13**, 256–264 (2010).
- 1213 101. Huang, Y.-C., Niu, C.-Y., Yang, C.-R. & Jinn, T.-L. The Heat Stress Factor HSFA6b  
1214 Connects ABA Signaling and ABA-Mediated Heat Responses. *Plant Physiol* **172**,  
1215 1182–1199 (2016).
- 1216 102. Poonia, A. K. *et al.* Overexpression of wheat transcription factor (TaHsfA6b)  
1217 provides thermotolerance in barley. *Planta* **252**, 53 (2020).
- 1218 103. Guo, W.-J. *et al.* SWEET17, a Facilitative Transporter, Mediates Fructose  
1219 Transport across the Tonoplast of Arabidopsis Roots and Leaves. *Plant Physiology*  
1220 **164**, 777–789 (2014).

- 1221 104. Eom, J.-S. *et al.* SWEETs, transporters for intracellular and intercellular sugar  
1222 translocation. *Current Opinion in Plant Biology* **25**, 53–62 (2015).
- 1223 105. Julius, B. T., Leach, K. A., Tran, T. M., Mertz, R. A. & Braun, D. M. Sugar  
1224 Transporters in Plants: New Insights and Discoveries. *Plant and Cell Physiology*  
1225 **58**, 1442–1460 (2017).
- 1226 106. Ermakova, M., Lopez-Calcagno, P. E., Raines, C. A., Furbank, R. T. & von  
1227 Caemmerer, S. Overexpression of the Rieske FeS protein of the Cytochrome b6f  
1228 complex increases C<sub>4</sub> photosynthesis in *Setaria viridis*. *Commun Biol* **2**, 314  
1229 (2019).
- 1230 107. Ubierna, N., Gandin, A. & Cousins, A. B. The response of mesophyll conductance  
1231 to short-term variation in CO<sub>2</sub> in the C<sub>4</sub> plants *Setaria viridis* and *Zea mays*. *Journal*  
1232 *of Experimental Botany* **69**, 1159–1170 (2018).
- 1233 108. Cano, F. J., Sharwood, R. E., Cousins, A. B. & Ghannoum, O. The role of leaf  
1234 width and conductances to CO<sub>2</sub> in determining water use efficiency in C<sub>4</sub> grasses.  
1235 *New Phytol* **223**, 1280–1295 (2019).
- 1236 109. Danila, F. R., Quick, W. P., White, R. G., Caemmerer, S. von & Furbank, R. T.  
1237 Response of plasmodesmata formation in leaves of C<sub>4</sub> grasses to growth  
1238 irradiance. *Plant, Cell & Environment* **42**, 2482–2494 (2019).
- 1239 110. Long, S. P. Gas exchange measurements, what can they tell us about the  
1240 underlying limitations to photosynthesis? Procedures and sources of error. *Journal*  
1241 *of Experimental Botany* **54**, 2393–2401 (2003).
- 1242 111. Maxwell, K. & Johnson, G. N. Chlorophyll fluorescence—a practical guide. 10  
1243 (2000).

- 1244 112. Murchie, E. H. & Lawson, T. Chlorophyll fluorescence analysis: a guide to good  
1245 practice and understanding some new applications. *Journal of Experimental*  
1246 *Botany* **64**, 3983–3998 (2013).
- 1247 113. Pfündel, E. Estimating the contribution of Photosystem I to total leaf chlorophyll  
1248 fluorescence. *Plant* **11** (1998).
- 1249 114. Pfündel, E. E., Klughammer, C., Meister, A. & Cerovic, Z. G. Deriving fluorometer-  
1250 specific values of relative PSI fluorescence intensity from quenching of  $F_0$   
1251 fluorescence in leaves of *Arabidopsis thaliana* and *Zea mays*. *Photosynth Res* **114**,  
1252 189–206 (2013).
- 1253 115. Björkman, O. & Demmig, B. Photon yield of  $O_2$  evolution and chlorophyll  
1254 fluorescence characteristics at 77 K among vascular plants of diverse origins.  
1255 *Planta* **170**, 489–504 (1987).
- 1256 116. Heberling, J. M. & Fridley, J. D. Resource-use strategies of native and invasive  
1257 plants in Eastern North American forests. *New Phytologist* **200**, 523–533 (2013).
- 1258 117. Feng, X. & Dietze, M. Scale dependence in the effects of leaf ecophysiological  
1259 traits on photosynthesis: Bayesian parameterization of photosynthesis models.  
1260 *New Phytologist* **200**, 1132–1144 (2013).
- 1261 118. Collatz, G. J., Ribas-Carbo, M. & Berry, J. A. Coupled Photosynthesis-Stomatal  
1262 Conductance Model for Leaves of C4 Plants. *Functional Plant Biol.* **19**, 519–538  
1263 (1992).
- 1264 119. Lê, S., Josse, J. & Husson, F. FactoMineR: An R Package for Multivariate Analysis.  
1265 *Journal of Statistical Software* **25**, 1–18 (2008).

- 1266 120. Love, M. I., Huber, W. & Anders, S. Moderated estimation of fold change and  
1267 dispersion for RNA-seq data with DESeq2. *Genome Biology* **15**, 550 (2014).
- 1268 121. Conway, J. R., Lex, A. & Gehlenborg, N. UpSetR: an R package for the  
1269 visualization of intersecting sets and their properties. *Bioinformatics* **33**, 2938–2940  
1270 (2017).
- 1271 122. McAdam, S. A. M., Brodribb, T. J. & Ross, J. J. Shoot-derived abscisic acid  
1272 promotes root growth: Shoot-derived abscisic acid promotes root growth. *Plant,*  
1273 *Cell & Environment* **39**, 652–659 (2016).
- 1274 123. Dautermann, O. *et al.* An algal enzyme required for biosynthesis of the most  
1275 abundant marine carotenoids. *Sci. Adv.* **6**, eaaw9183 (2020).
- 1276 124. Kromdijk, J. *et al.* Improving photosynthesis and crop productivity by accelerating  
1277 recovery from photoprotection. *Science* **354**, 857–861 (2016).
- 1278 125. Reynolds, E. S. The use of lead citrate at high pH as an electron-opaque stain in  
1279 electron microscopy. *The Journal of Cell Biology* **17**, 208–212 (1963).
- 1280 126. Witt, H. T. Energy conversion in the functional membrane of photosynthesis.  
1281 Analysis by light pulse and electric pulse methods: The central role of the electric  
1282 field. **73** (1979).
- 1283
- 1284

# High Light and High Temperature Reduce Photosynthesis via Different Mechanisms in the C<sub>4</sub> Model *Setaria viridis*

## Anderson et al. Main figures

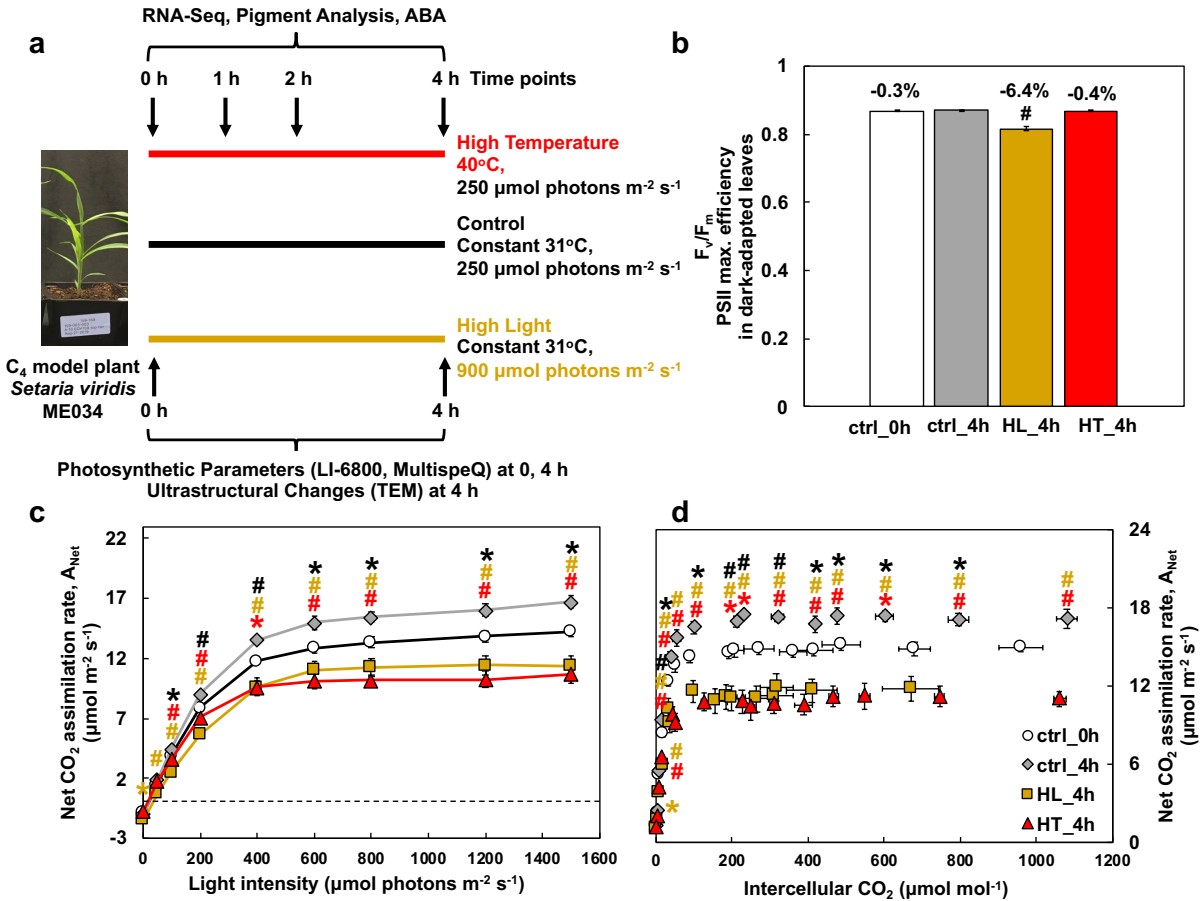

**Figure 1: High light (HL) and high temperature (HT) resulted in comparable reduction of net CO<sub>2</sub> assimilation rates and HL also caused significant photoinhibition in *S. viridis* leaves. (a) Experimental overview. We investigated how the C<sub>4</sub> model plant *S. viridis* ME034 responded to HL or HT at different levels. Plants were grown under the control condition (31°C and 250  $\mu\text{mol m}^{-2} \text{s}^{-1}$  light) for 13 days, then treated with control growth condition or HL (31°C, 900  $\mu\text{mol m}^{-2} \text{s}^{-1}$ ) or HT (40°C, 250  $\mu\text{mol m}^{-2} \text{s}^{-1}$  light) in different growth chambers for 4 h. The fourth fully expanded true leaves were utilized for all analyses. Leaf tissues from different treatments were harvested at 0, 1, 2, and 4 h time points for the analysis of RNA-seq, pigments, and leaf**

ABA levels. Photosynthetic parameters were measured using intact leaves at 0 and 4 h time points, including gas exchange and chlorophyll fluorescence using LI-6800 and spectroscopic measurements using MultispeQ. Transmission Electron Microscopy (TEM) analysis was performed to investigate chloroplast ultrastructure changes in leaves after 4 h treatments. **(b)** HL-treated leaves had reduced PSII maximum efficiency ( $F_v/F_m$ ).  $F_v/F_m$  was measured by chlorophyll fluorescence in LI-6800 with 20 min dark-adapted leaves. Pound symbols indicate statistically significant differences of ctrl\_0h (at the start of treatments), HL\_4h (after 4 h HL), and HT\_4h (after 4 h HT) compared to ctrl\_4h (after 4 h control treatment) using Student's two-tailed t-test with unequal variance (#  $p < 0.01$ ). Percentages indicate reduction in  $F_v/F_m$  compared to ctrl\_4h. **(c, d)** Net CO<sub>2</sub> assimilation rates during light response and CO<sub>2</sub> response, respectively. Asterisk and pound symbols indicate statistically significant differences of ctrl\_0h, HL\_4h, and HT\_4h compared to ctrl\_4h using Student's two-tailed t-test with unequal variance. P-values were corrected for multiple comparisons using FDR (\* $0.01 < p < 0.05$ , # $p < 0.01$ , the colors of \* and # match the significance of the indicated conditions, black for ctrl\_0h, yellow for HL\_4h, red for HT\_4h). Mean  $\pm$  SE,  $n = 3-6$  biological replicates.



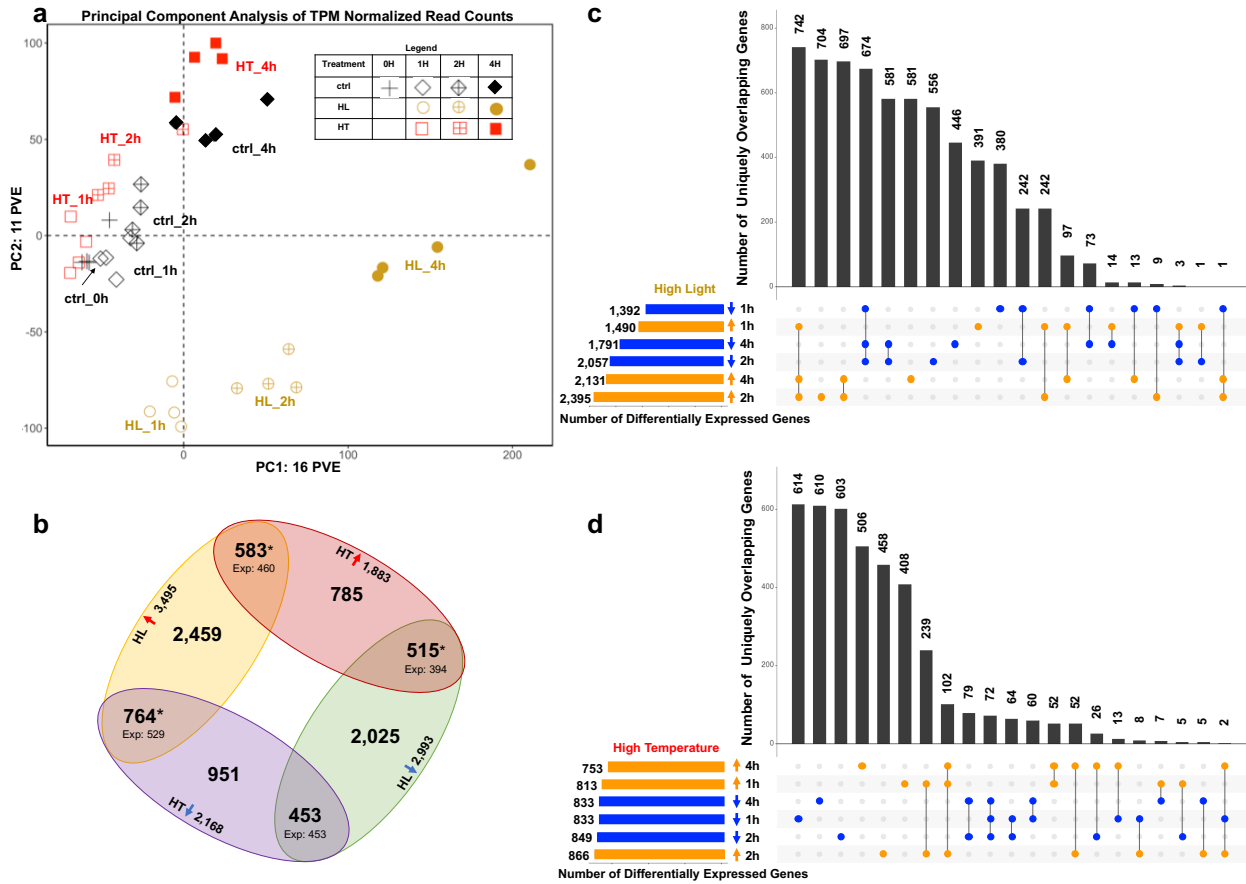

**Figure 2: Time course transcriptome data reveal dynamic responses to high light or high temperature stresses in *S. viridis*.** (a) Principal Component Analysis of TPM (transcripts per million) normalized read counts in control (ctrl), high light (HL), and high temperature (HT) treated samples. The first two principal components representing the highest percent variance explained are displayed. PC1 explains 16% of the variance in the dataset and mainly separates the samples based on time. PC2 explains 11% of the variance in the dataset and mainly separates the HL samples from the ctrl and HT samples. Black diamonds indicate ctrl samples, yellow circles indicate HL samples, and red squares indicate HT samples. Different fillings for these symbols indicate different time points of each treatment. Each treatment and time point have four biological replicates, represented by symbols with the same shape and color. (b) HL and HT treatments had more overlapping differentially expressed genes than expected by random chance. Gene sets represent the number of genes differentially regulated in at least one time point in the given condition. Red upward arrows denote up-regulation and

blue downward arrows denote down-regulation. Yellow oval denotes HL up-regulated genes, green oval denotes HL down-regulated genes, red oval denotes HT up-regulated genes, purple oval denotes HT down-regulated genes. Expected values (Exp) are the number of the overlapping genes expected by random chance based on size of the gene lists and background of all genes tested via DeSeq2 (14,302). Numbers above expected values are the actual number of overlapped genes between two conditions. \* $p < 0.0001$ , Fisher's Exact Test. **(c, d)** HT transcriptional responses are more transient than HL. UpSetR plots show number of uniquely overlapping genes between up and down regulated gene sets at each time point in HL and HT, respectively. Horizontal bars indicate the number of genes up or down regulated at each time point. Filled circles indicate the gene sets included in the overlap shown. Vertical bars indicate the number of genes represented in the overlap shown. Overlapping gene sets are arranged in descending order by number of genes. Genes may only belong to a single overlapping gene set and are sorted into the overlapping set with the highest number of interactions.

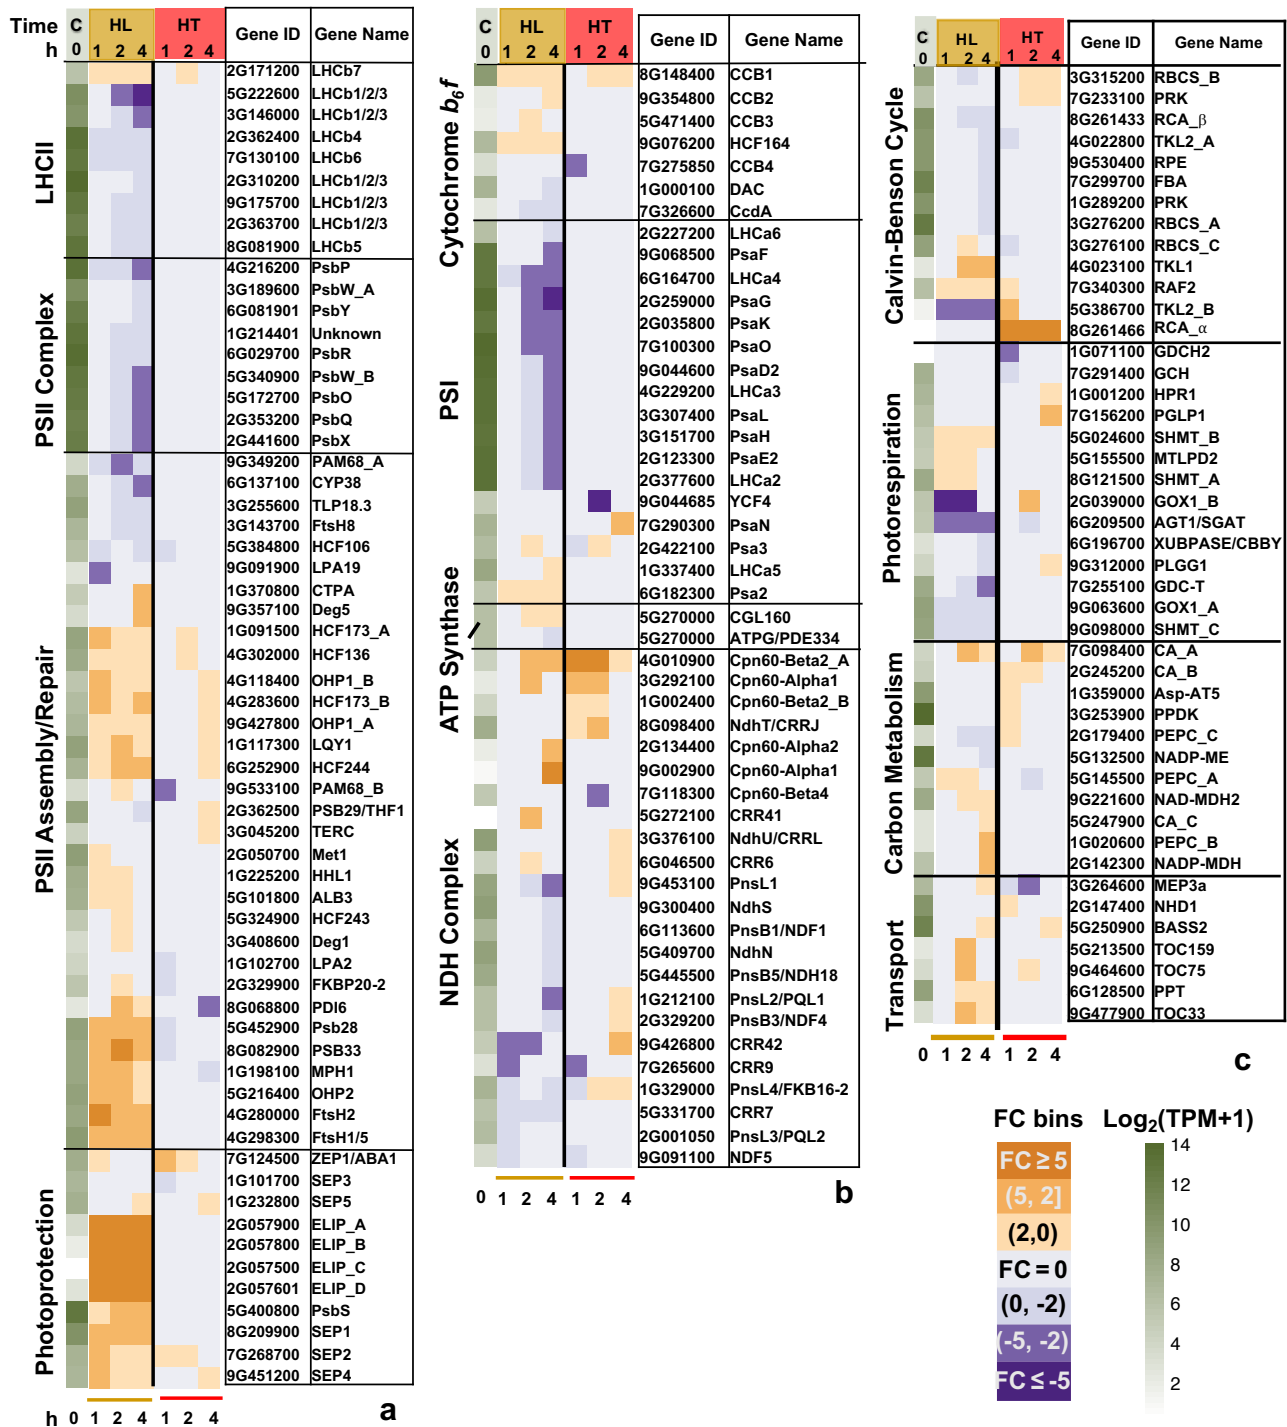

**Figure 3: High light (HL) differentially regulated genes involved in photosynthesis more than high temperature (HT).** (a, b) Genes related to light reaction of photosynthesis and photoprotection. (c) Genes related to carbon metabolism and chloroplast transport. The first green column displays  $\log_2(\text{mean TPM} + 1)$  at ctrl\_0h (at the start of treatments, C). TPM, transcripts per million, normalized read counts. Heatmap

displays the fold change (FC) bin of DeSeq2 model output values at 1, 2, 4 h of HL or HT versus control at the same timepoint ( $q < 0.05$ ). FC bins: highly induced:  $FC \geq 5$ ; moderately induced:  $5 > FC \geq 2$ ; slightly induced:  $2 > FC > 0$ ; not differentially expressed:  $FC = 0$ ; slightly repressed:  $0 > FC > -2$ ; moderately repressed:  $-2 \geq FC > -5$ ; highly repressed:  $FC \leq -5$ . Gene ID: *S. viridis* v2.1 gene ID, excluding "Sevir.". All genes presented in the heatmaps were significantly differentially regulated in at least one time point.

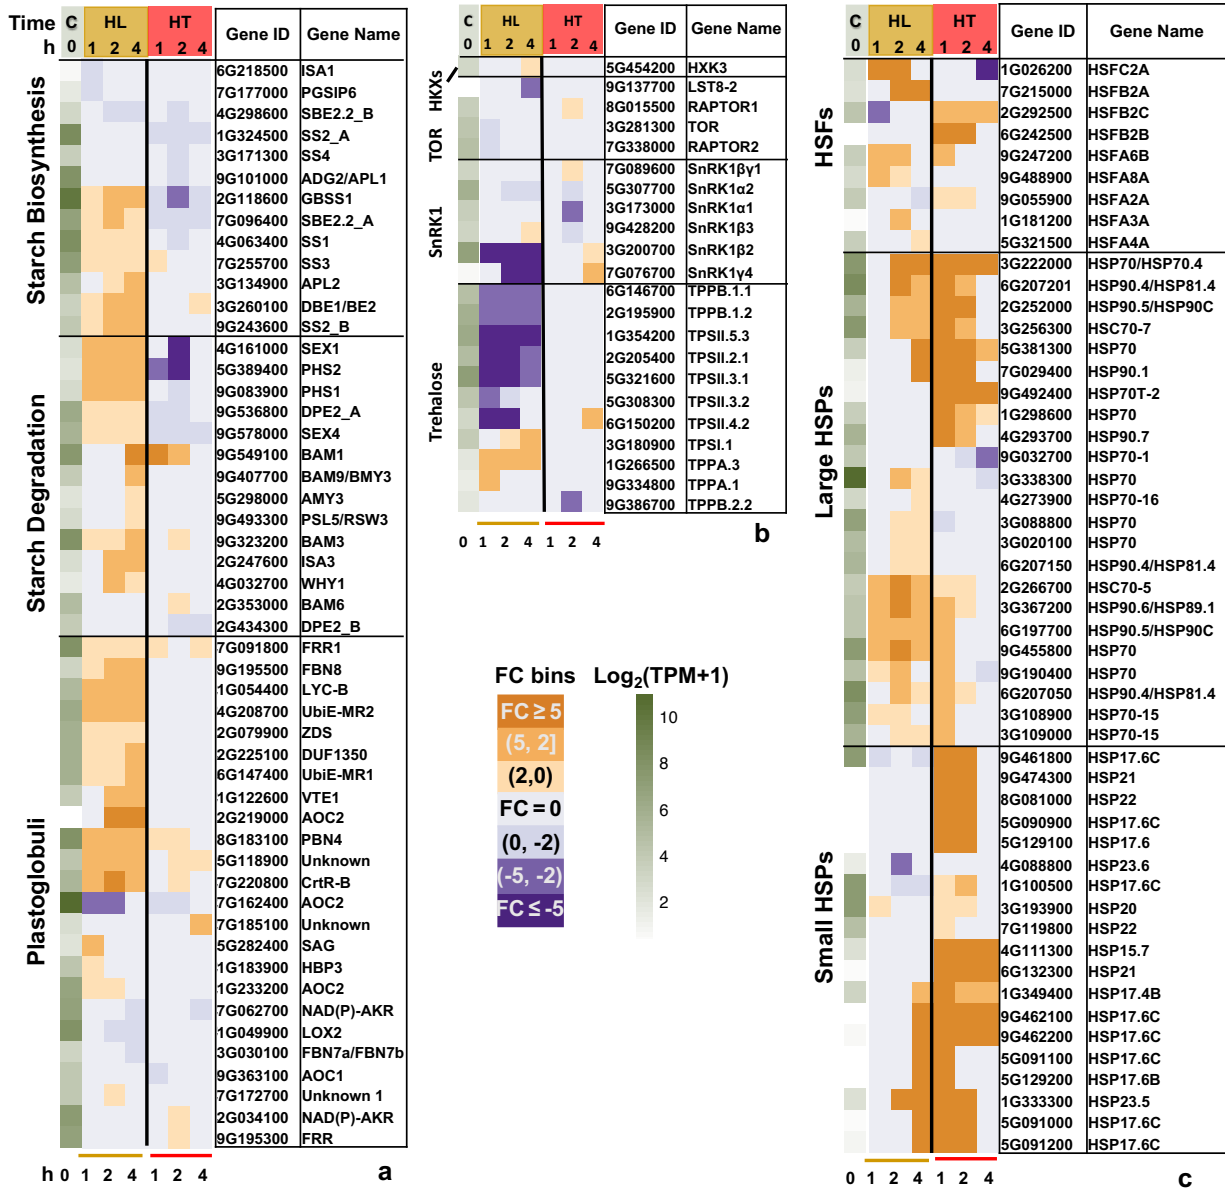

**Figure 4: High light (HL) and high temperature (HT) differentially regulated genes involved in several key pathways. (a, b) HL induced genes involved in starch biosynthesis/degradation and genes encoding plastoglobuli-localized proteins; (b) HL down-regulated many genes of the sugar-sensing pathways; (c) Both HL and HT induced genes encoding shock transcription factors (HSFs) and heat shock proteins (HSPs) but the induction was much quicker under HT than HL. The first green column displays log<sub>2</sub>(mean TPM + 1) at ctrl\_0h (at the start of treatments, C). TPM, transcripts per million, normalized read counts. Heatmap displays the fold change (FC) bin of DeSeq2 model output values at 1, 2, 4 h of HL or HT versus control at the same timepoint (q < 0.05). FC**

bins: highly induced:  $FC \geq 5$ ; moderately induced:  $5 > FC \geq 2$ ; slightly induced:  $2 > FC > 0$ ; not differentially expressed:  $FC = 0$ ; slightly repressed:  $0 > FC > -2$ ; moderately repressed:  $-2 \geq FC > -5$ ; highly repressed:  $FC \leq -5$ . Gene ID: *S. viridis* v2.1 gene ID, excluding "Sevir.". All genes presented in the heatmaps were significantly differentially regulated in at least one time point.

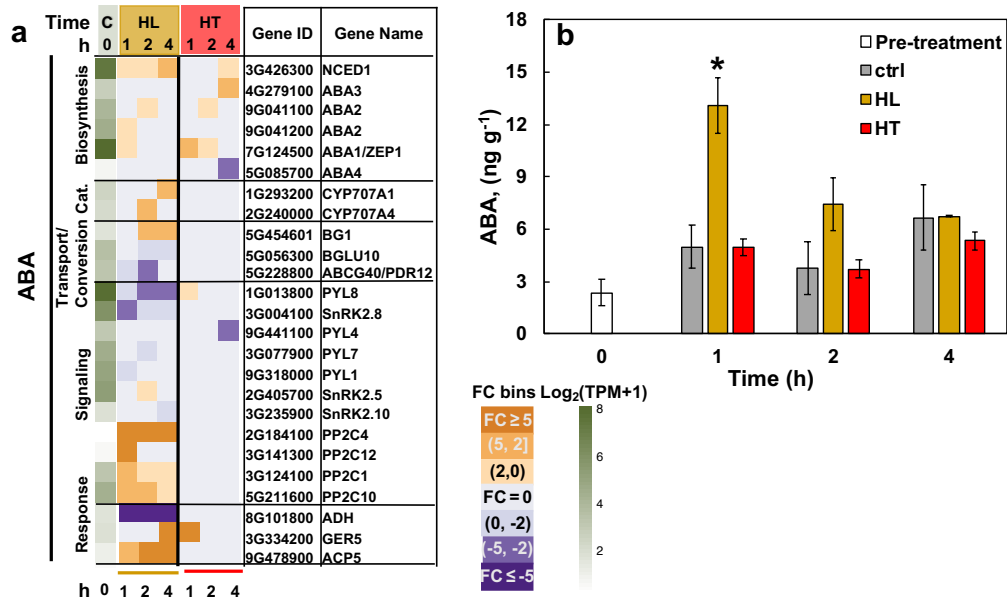

**Figure 5: High light (HL) up-regulated genes involved in the abscisic acid (ABA) pathway and transiently increased leaf ABA levels. (a)** Heatmap of differentially regulated genes involved in the ABA pathway. Cat: catabolism. The first green column displays  $\log_2(\text{mean TPM} + 1)$  at ctrl\_0h (at the start of treatments, C). TPM, transcripts per million, normalized read counts. Heatmap displays the fold change (FC) bin of DeSeq2 model output values at 1, 2, 4 h of HL or HT versus control at the same timepoint ( $q < 0.05$ ). FC bins: highly induced:  $FC \geq 5$ ; moderately induced:  $5 > FC \geq 2$ ; slightly induced:  $2 > FC > 0$ ; not differentially expressed:  $FC = 0$ ; slightly repressed:  $0 > FC > -2$ ; moderately repressed:  $-2 \geq FC > -5$ ; highly repressed:  $FC \leq -5$ . Gene ID: *S. viridis* v2.1 gene ID, excluding “Sevir.”. All genes presented in the heatmaps were significantly differentially regulated in at least one time point. **(b)** Concentrations of leaf ABA. Mean  $\pm$  SE,  $n = 3$  biological replicates. Asterisk symbol indicates statistically significant differences as compared to the control condition at the same time point. (Student’s two-tailed t-test with unequal variance,  $*0.01 < p < 0.05$ ).

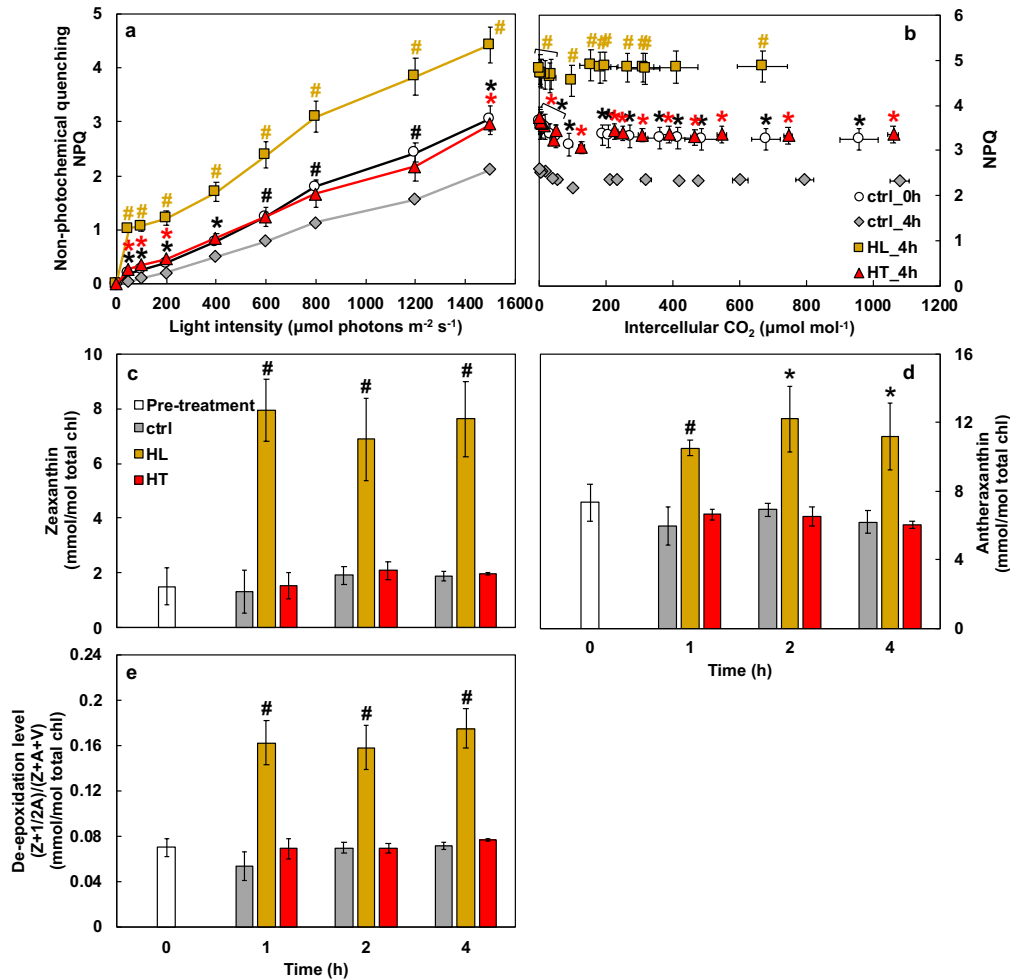

**Figure 6: High light (HL) induced non-photochemical quenching (NPQ) and increased zeaxanthin as well as de-epoxidation levels. (a) Light and (b)  $\text{CO}_2$  response of NPQ. Mean  $\pm$  SE,  $n = 3-6$  biological replicates. Asterisk and pound symbols indicate statistically significant differences of ctrl\_0h (at the start of treatments), HL\_4h (after 4 h high light), and HT\_4h (after 4 h high temperature) compared to ctrl\_4h (after 4 h control treatment) using Student's two-tailed t-test with unequal variance. P-values were corrected for multiple comparisons using FDR ( $*0.01 < p < 0.05$ ,  $\#p < 0.01$ , the colors of \* and # match the significance of the indicated conditions, black for ctrl\_0h, yellow for HL\_4h, red for HT\_4h). (c, d, e) Concentrations of zeaxanthin, antheraxanthin, and xanthophyll cycle de-epoxidation. Mean  $\pm$  SE,  $n = 3$  biological replicates. Asterisk and pound symbols indicate statistically significant differences of high light (HL) or high temperature (HT) treatments compared to the control (ctrl) condition at the same time points using Student's two-tailed t-test with unequal variance ( $*0.01 < p < 0.05$ ,  $\#p < 0.01$ ).**



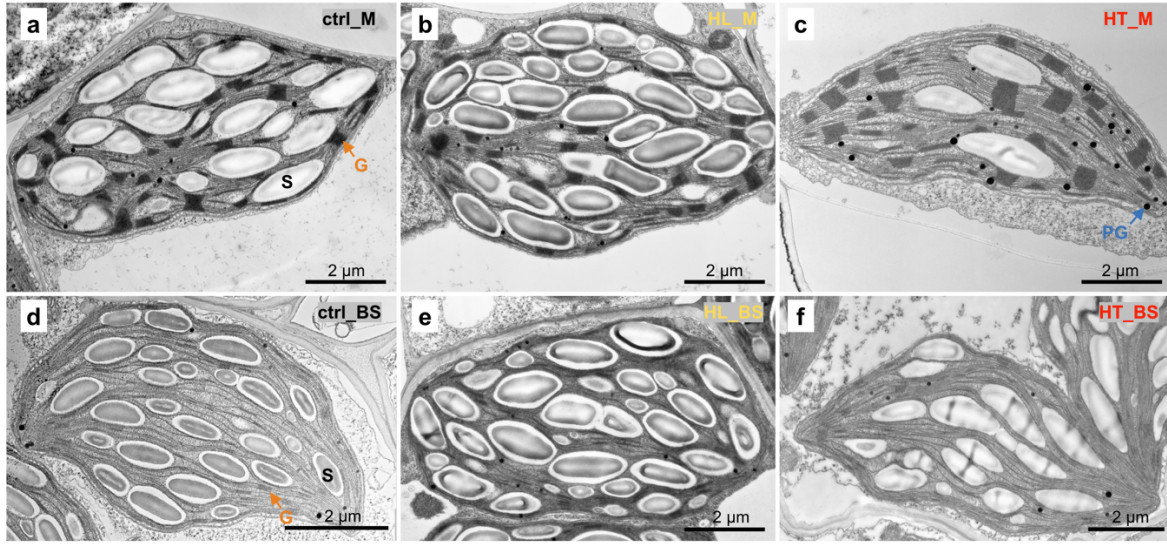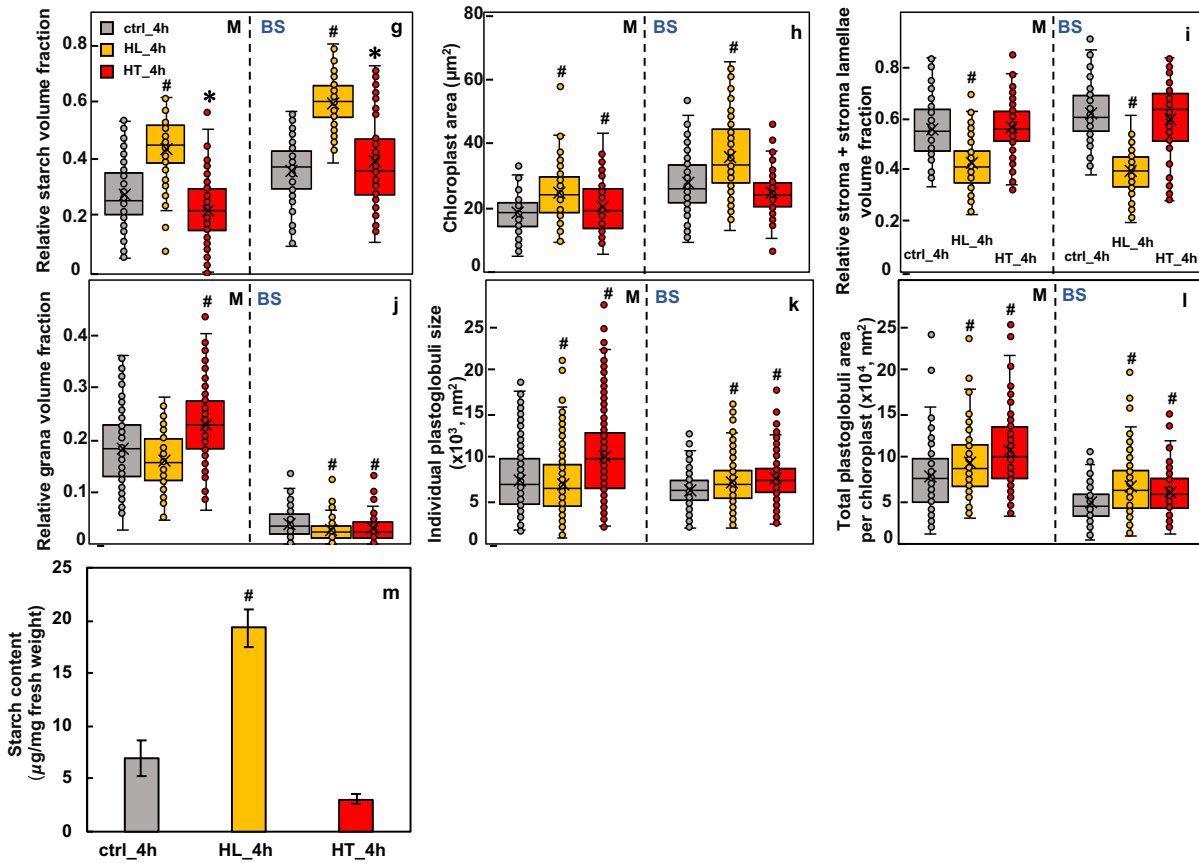

**Figure 7: High light (HL) increased starch accumulation and both HL and high temperature (HT) treatments induced chloroplast plastoglobuli formation in *S. viridis* leaves. (a-f) Representative transmission electron microscopy (TEM) images of mesophyll (M) and bundle sheath (BS) chloroplasts in leaves of *S. viridis* after 4 h**

treatments of control (ctrl\_4h, 31°C, 250  $\mu\text{mol m}^{-2} \text{s}^{-1}$  light) or high light (HL\_4h, 31°C, 900  $\mu\text{mol m}^{-2} \text{s}^{-1}$ ) or high temperature (HT\_4h, 40°C, 250  $\mu\text{mol m}^{-2} \text{s}^{-1}$  light). TEM images of M (**a, b, c**) and BS (**d,e,f**) chloroplasts. S labels the starch granule; G labels grana, the orange arrows indicate grana in M and BS chloroplasts; PG labels plastoglobuli. (**g, i, j**) Relative volume fraction of indicated parameters were quantified using Stereo Analyzer with Kolmogorov–Smirnov test for statistical analysis compared to the same cell type of the control condition. (**h, k, l**) area and size of indicated parameters were quantified using ImageJ with two-tailed t-test with unequal variance compared to the same cell type of the control condition. Each treatment had three biological replicates, total 90-120 images per treatment. \*0.05<p<0.01; #p<0.01. (**m**) Starch quantification using starch assay kits. HL\_4h leaves accumulated 4x starch as compared to ctrl\_4h leaves. Values are mean  $\pm$  SE,  $n = 3$  biological replicates. Pound symbols indicate statistically significant differences as compared to ctrl\_4h using Student's two-tailed t-test with unequal variance (#p< 0.01).

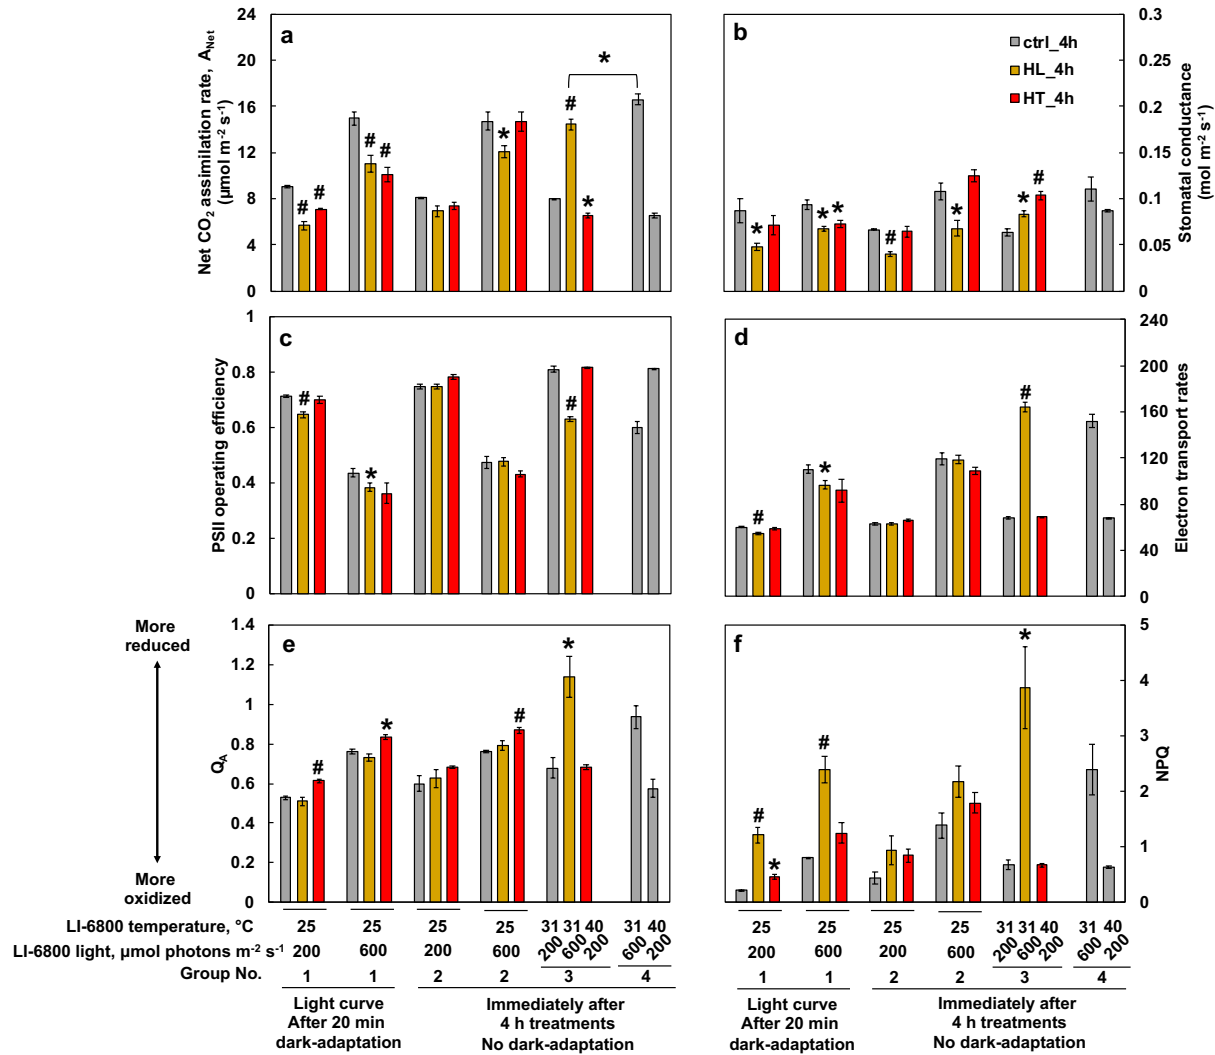

**Figure 8: High light or high temperature treated leaves had lower photosynthetic capacities than leaves treated with the control condition.** *S. viridis* plants were treated with 4 h of control growth condition (ctrl\_4h, 31°C, 250  $\mu\text{mol m}^{-2} \text{s}^{-1}$  light) or high light (HL\_4h, 31°C, 900  $\mu\text{mol m}^{-2} \text{s}^{-1}$ ) or high temperature (HT\_4h, 40°C, 250  $\mu\text{mol m}^{-2} \text{s}^{-1}$  light) in different growth chambers. After the treatments, an intact fourth fully expanded true leaf from each treated plant was clamped in the LI-6800 leaf chamber to measure various photosynthetic parameters. Group 1 are select data from the light response curves after 20 min dark-adaptation in the LI-6800 leaf chamber with indicated light and temperature. Groups 2,3,4 were measured immediately after 4 h of ctrl, HL, HT treatments without dark-adaptation and under the indicated temperature and light condition in the LI-6800 leaf chamber. Individual plants were used for each replicate. (a) Net CO<sub>2</sub> assimilation

rates. **(b)** Stomatal conductance. **(c)** PSII operating efficiency. **(d)** Electron transport rate. **(e)** Plastoquinone redox status ( $Q_A$ ). **(f)** NPQ, Non-photochemical quenching. Asterisk and pound symbols indicate statistically significant differences of HL\_4h and HT\_4h leaves compared to ctrl\_4h leaves in the same group or under the same LI-6800 leaf chamber condition using Student's two-tailed t-test with unequal variance ( $*0.01 < p < 0.05$ ,  $\#p < 0.01$ ).

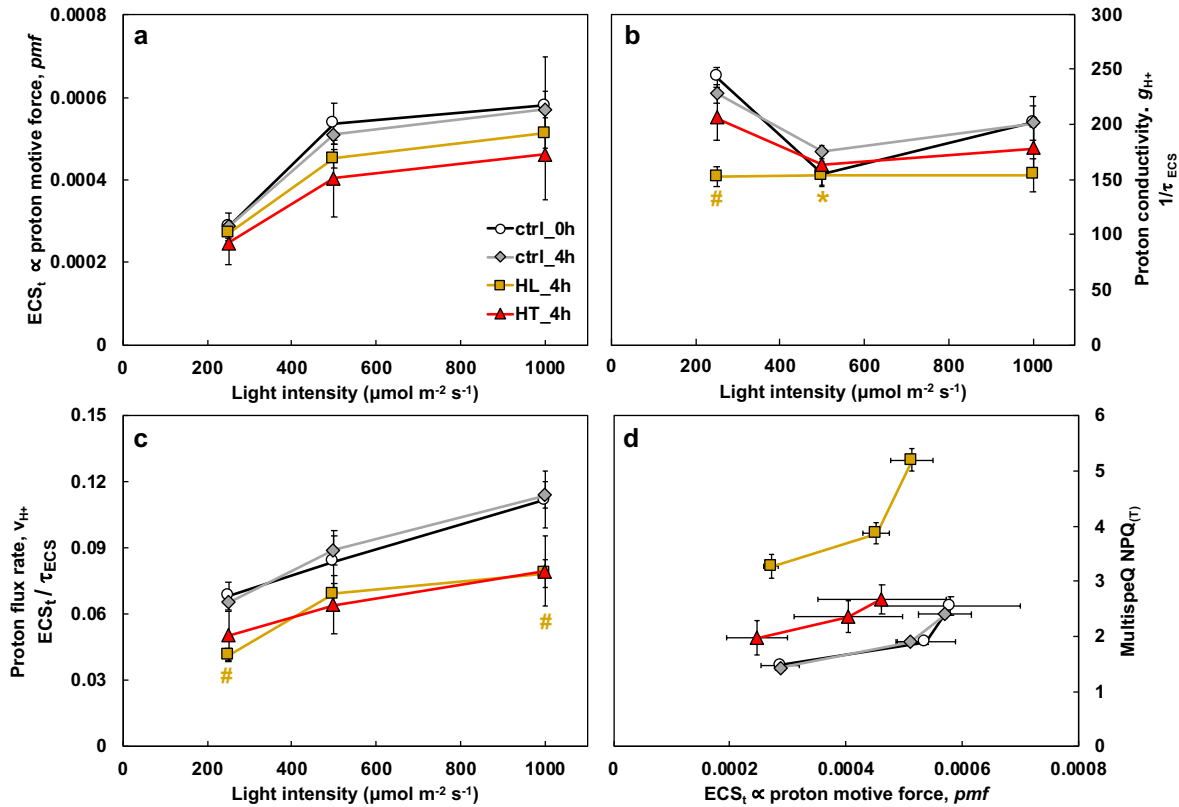

**Figure 9: High light treatment inhibited ATP synthase activity.** *S. viridis* plants were treated with 4 h of control growth condition (ctrl\_4h, 31°C, 250  $\mu\text{mol m}^{-2} \text{s}^{-1}$  light) or high light (HL\_4h, 31°C, 900  $\mu\text{mol m}^{-2} \text{s}^{-1}$ ) or high temperature (HT\_4h, 40°C, 250  $\mu\text{mol m}^{-2} \text{s}^{-1}$  light) in different growth chambers. After the treatments, photosynthetic parameters in treated leaves were monitored using the MultispeQ instrument. **(a)**  $\text{ECS}_t$ , measured by electrochromic shift (ECS), representing the transthylakoid proton motive force, *pmf*. **(b)** Proton conductivity ( $g_{\text{H}^+} = 1/\tau_{\text{ECS}}$ ), proton permeability of the thylakoid membrane and largely dependent on the activity of ATP synthase, inversely proportional to the decay time constant of light-dark transition induced ECS signal ( $\tau_{\text{ECS}}$ ). **(c)** Proton flux rates,  $v_{\text{H}^+}$ , calculated by  $\text{ECS}_t / \tau_{\text{ECS}}$ , the initial decay rate of the ECS signal during the light-dark transition and proportional to proton efflux through ATP synthase to make ATP. **(d)** Non-photochemical quenching (NPQ) measured by MultispeQ. Mean  $\pm$  SE,  $n = 3$  biological replicates. Asterisk and pound symbols indicate statistically significant differences of ctrl\_0h, HL\_4h, and HT\_4h compared to ctrl\_4h using Student's two-tailed t-test with unequal variance. (\* $0.01 < p < 0.05$ , # $p < 0.01$ , the colors of \* and # match the significance of the indicated conditions, yellow for HL\_4h).

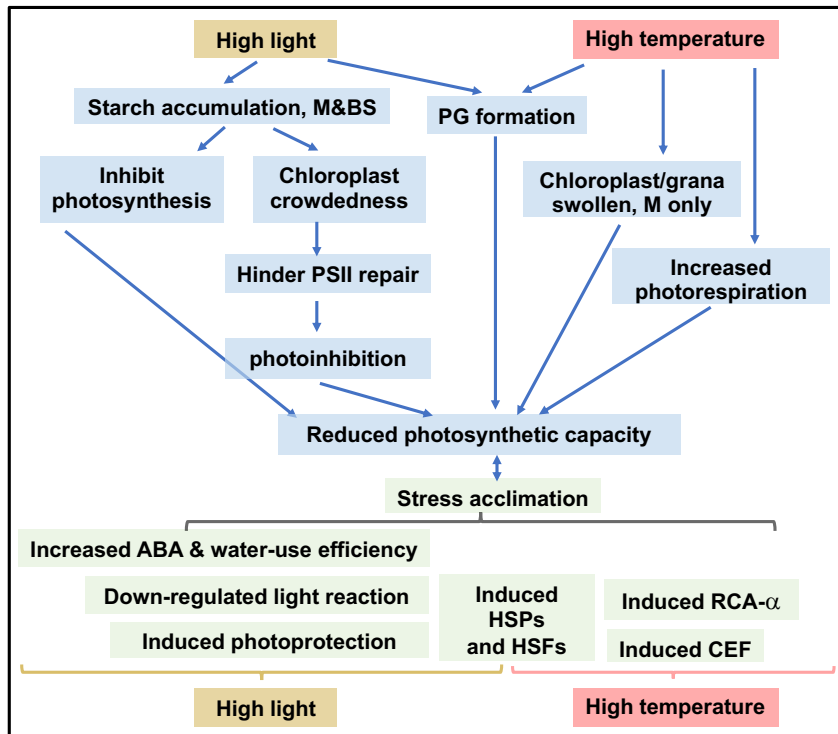

**Figure 10: Summary of how *S. viridis* responds to high light (HL) or high temperature (HT).** Light blue boxes denote changes that may lead to the reduced photosynthetic capacities; light green boxes denote changes that may be adaptive for stress acclimation. M: mesophyll chloroplasts; BS, bundle sheath chloroplasts. HL-treated leaves had over-accumulated starch and increased chloroplast crowdedness, which may hinder PSII repair and result in photoinhibition. Starch accumulation may also inhibit photosynthesis through feedback regulation. Increased plastoglobuli (PG) formation in HL-treated leaves may affect thylakoid composition and function. Under HT, M chloroplasts had swollen chloroplasts/grana and seem more heat-sensitive than BS chloroplasts. Heat-induced photorespiration and PG formation could further reduce photosynthesis. Meanwhile, HL and HT also induce adaptive responses for acclimation. Under HL, the induced photoprotection, down-regulated light reaction, and increased water-use efficiency through abscisic acid (ABA) can help *S. viridis* acclimate to excess light. Under HT, the induced cyclic electron flow (CEF) and Rubisco activase (RCA- $\alpha$ ) can protect photosynthesis from heat stress. The induced heat shock transcription factors (HSFs) and heat shock proteins (HSPs) are adaptive responses to both HL and HT although the induction was much quicker under HT.

## High Light and High Temperature Reduce Photosynthesis via Different Mechanisms in the C<sub>4</sub> Model *Setaria viridis*

### Anderson et al. Supplementary Figures

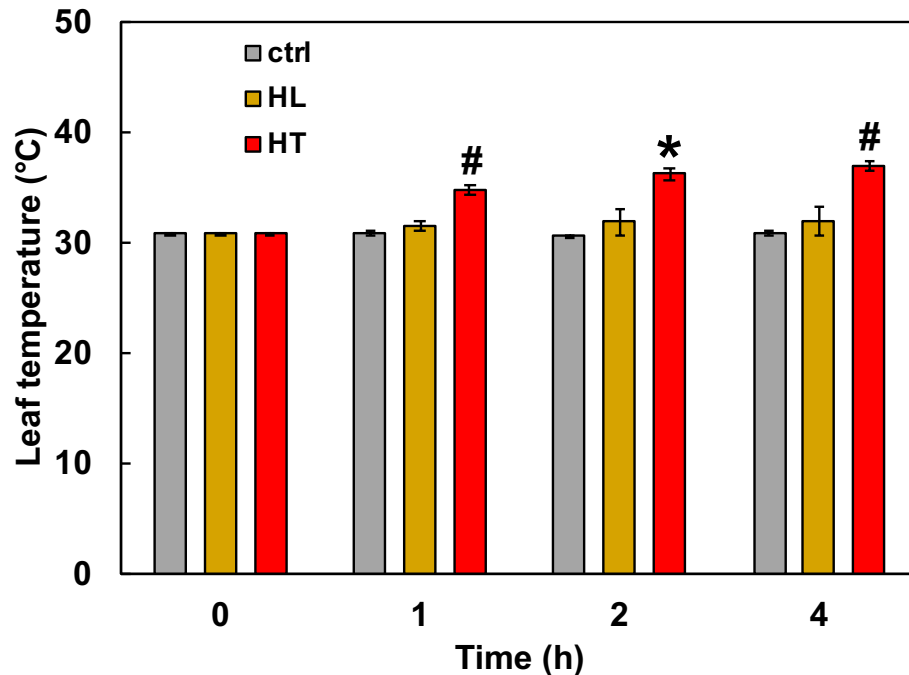

**Supplementary Figure 1. Leaf temperatures of *S. viridis* stayed constant during the control and high light treatments while increased during high temperature treatment.** Leaf temperatures of *S. viridis* measured over the 4 h time course of control or high light or high temperature treatments. *S. viridis* plants were treated with control growth condition (ctrl, 31°C and 250  $\mu\text{mol m}^{-2} \text{s}^{-1}$  light) or high light (HL, 31°C and 900  $\mu\text{mol m}^{-2} \text{s}^{-1}$ ) or high temperature (HT, 40°C and 250  $\mu\text{mol m}^{-2} \text{s}^{-1}$  light) in different growth chambers for 4 h. Leaf temperature was measured at 0, 1, 2, and 4 h for each treatment. Mean  $\pm$  SE,  $n = 3$  biological replicates. Asterisk and pound symbols indicate statistically significant differences of HL and HT compared to ctrl in a given time point using Student's two-tailed t-test with unequal variance (\*0.01< $p$ <0.05, # $p$ <0.01). No significant changes of leaf temperatures during the ctrl and HL condition.

**a Stage 1**

| <b>Dark adaptation:</b>                                          |              |      |                               |
|------------------------------------------------------------------|--------------|------|-------------------------------|
| Light intensity,<br>$\mu\text{mol photons m}^{-2} \text{s}^{-1}$ | Time,<br>min | Logs | Measurement<br>frequency, min |
| 0                                                                | 20           | 1    |                               |
| Total time: 20 min, $\text{CO}_2$ : $400 \mu\text{mol mol}^{-1}$ |              |      |                               |

**b Stage 2**

| <b>Light response experiment:</b>                                |              |      |                               |
|------------------------------------------------------------------|--------------|------|-------------------------------|
| $\text{CO}_2$ : $400 \mu\text{mol mol}^{-1}$                     |              |      |                               |
| Light intensity,<br>$\mu\text{mol photons m}^{-2} \text{s}^{-1}$ | Time,<br>min | Logs | Measurement<br>frequency, min |
| 50                                                               | 5            | 2    | 2.5                           |
| 100                                                              | 5            | 2    | 2.5                           |
| 200                                                              | 5            | 2    | 2.5                           |
| 400                                                              | 5            | 2    | 2.5                           |
| 600                                                              | 5            | 2    | 2.5                           |
| 800                                                              | 5            | 2    | 2.5                           |
| 1200                                                             | 5            | 2    | 2.5                           |
| 1500                                                             | 10           | 4    | 2.5                           |
| Total time: 65 min                                               |              |      |                               |

**c Stage 3**

| <b>CO<sub>2</sub> response experiment:</b>               |
|----------------------------------------------------------|
| Light: $1500 \mu\text{mol photons m}^{-2} \text{s}^{-1}$ |
| [CO <sub>2</sub> ] reference                             |
| 400                                                      |
| 300                                                      |
| 200                                                      |
| 100                                                      |
| 50                                                       |
| 20                                                       |
| 10                                                       |
| 400 x 8                                                  |
| 500                                                      |
| 600                                                      |
| 700                                                      |
| 800                                                      |
| 900                                                      |
| 1000                                                     |
| 1200                                                     |
| 1500                                                     |
| 400                                                      |
| Total time: ~45 min                                      |

**Supplementary Figure 2. LI-6800 protocol for characterizing photosynthetic parameters.** Before or after 4 h different treatments, intact *S. viridis* leaves were dark-adapted in LI-6800 leaf chamber for 20 min (**a**) to measure the maximum PSII efficiency ( $F_v/F_m$ ), followed by (**b**) light response experiment from 50 – 1500  $\mu\text{mol photons m}^{-2} \text{s}^{-1}$  light and then (**c**)  $\text{CO}_2$  response experiment at 1500  $\mu\text{mol photons m}^{-2} \text{s}^{-1}$  light.



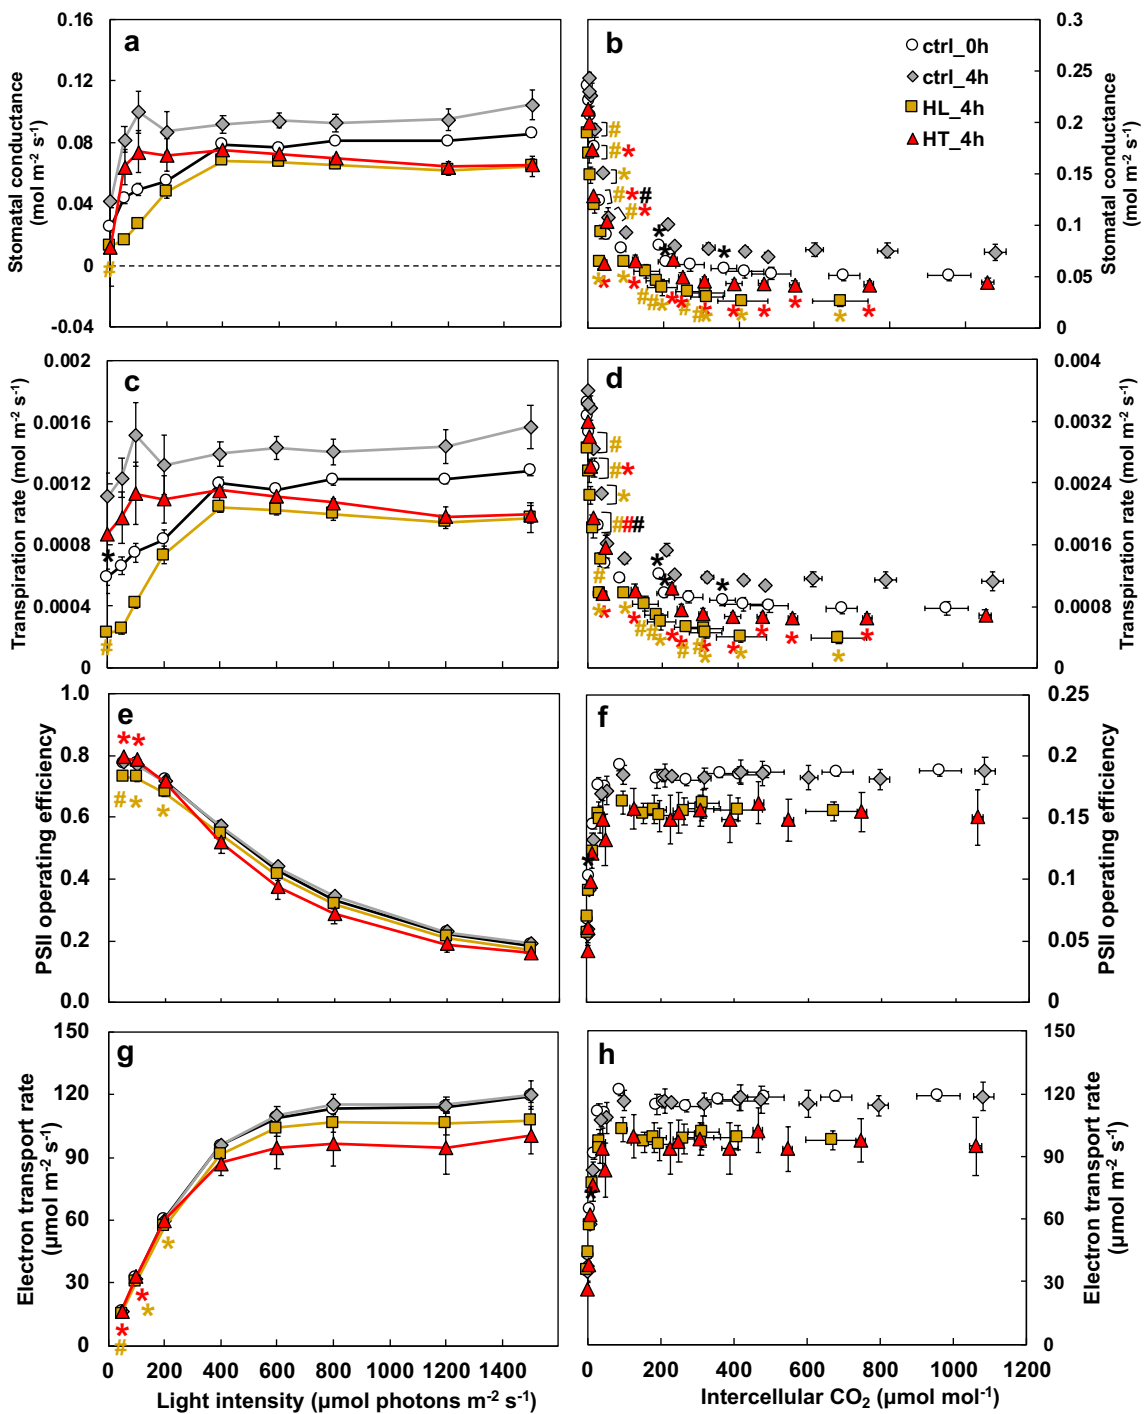

**Supplementary Figure 3: High light or high temperature treatments affected photosynthetic parameters measured by gas exchange and chlorophyll fluorescence. Photosynthetic parameters measured during light (a, c, e, g) and CO<sub>2</sub> (b,**

**d, f, h**) response. Mean  $\pm$  SE,  $n = 3-6$  biological replicates. Asterisk and pound symbols indicate statistically significant differences of ctrl\_0h (at the start of treatments), HL\_4h (after 4 h high light), and HT\_4h (after 4 h temperature) compared to ctrl\_4h (after 4 h control treatment) using Student's two-tailed t-test with unequal variance. P-values were corrected for multiple comparisons using FDR (\* $0.01 < p < 0.05$ , # $p < 0.01$ , the colors of \* and # match the significance of the indicated conditions, black for ctrl\_0h, yellow for HL\_4h, red for HT\_4h).

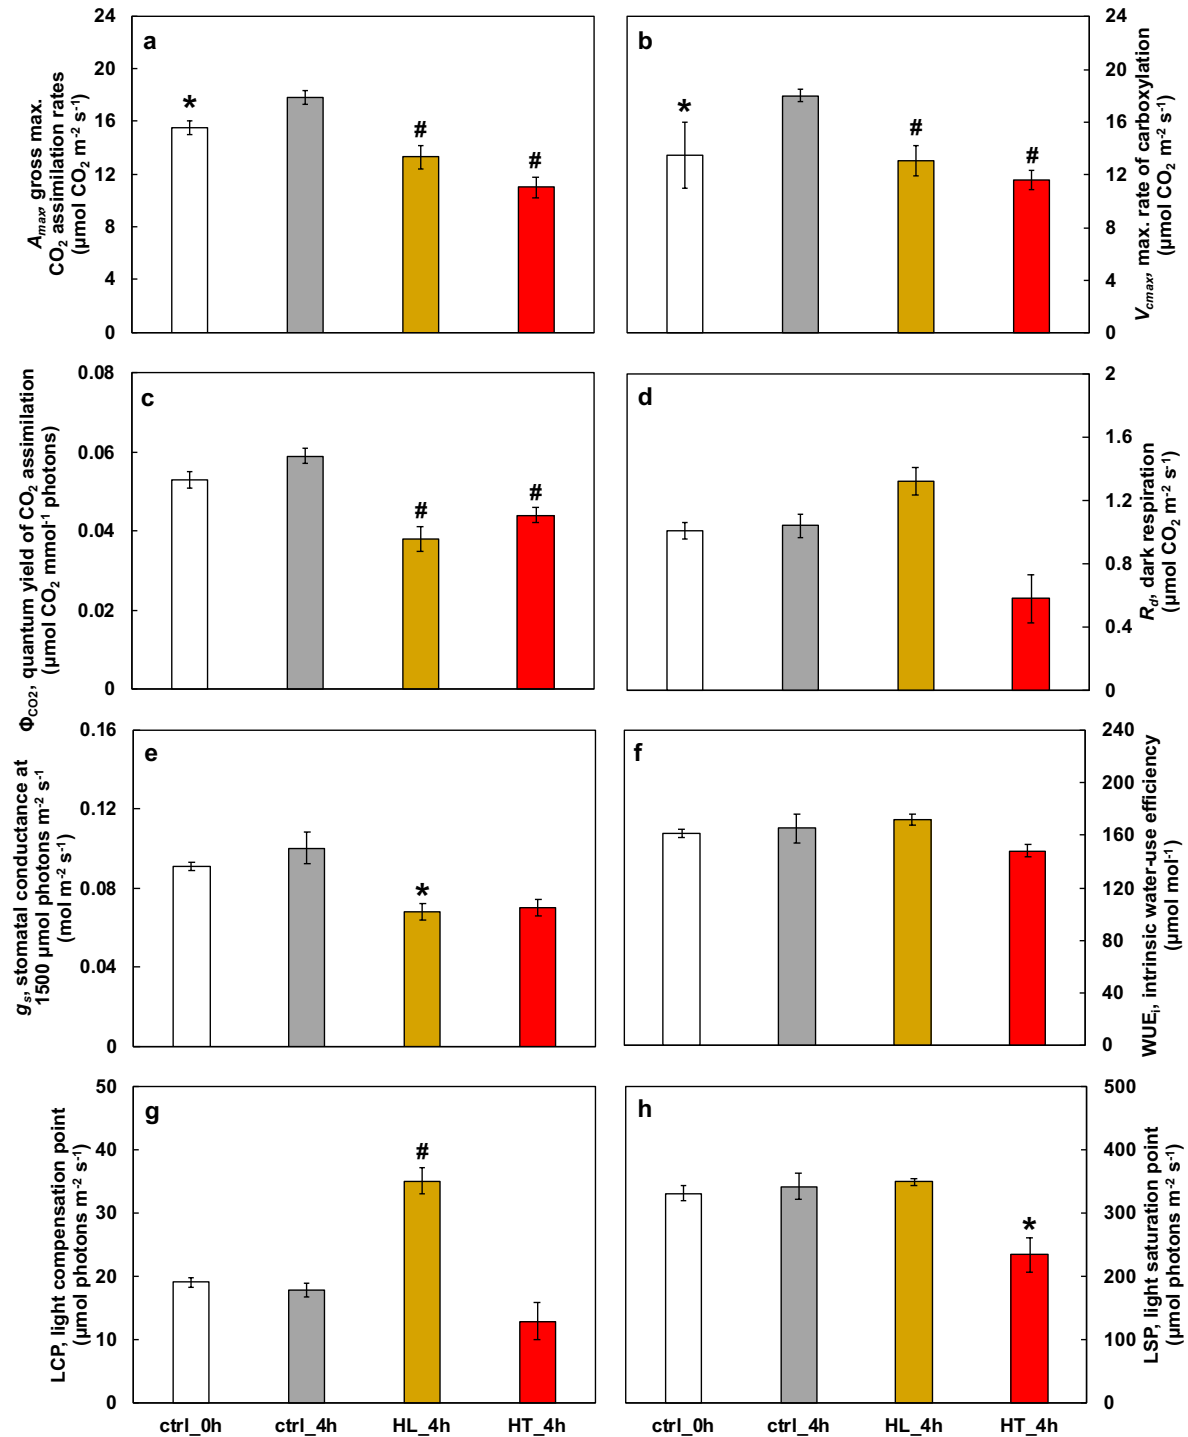

**Supplementary Figure 4: High light or high temperature treated leaves had reduced photosynthetic efficiency.** Photosynthetic parameters were derived from light and  $\text{CO}_2$  response curves (mean  $\pm$  SE;  $n = 3-6$ ). (a) the maximum gross  $\text{CO}_2$  assimilation rates,  $A_{max}$ ; (b) the maximum rate of carboxylation,  $V_{cmax}$ ; (c) the quantum yield of  $\text{CO}_2$

assimilation,  $\Phi_{CO_2}$ , which is the ratio of the moles of  $CO_2$  fixed in photosynthesis per mole of quanta (photons of light) absorbed, and is a measure of the efficiency in which light is converted into fixed carbon; **(d)** the day-time dark respiration rate,  $R_d$ , equal to  $A_n$  when light intensity is zero; **(e)** stomatal conductance,  $g_s$ ; **(f)** water use efficiency, WUE; **(g)** light compensation point, LCP, the threshold of low light intensity at which photosynthesis is equal to leaf respiration and, therefore  $A_n$  is zero; **(h)** light saturation point, LSP, the estimated light intensity where 75 % of  $A_{max}$  was reached. Asterisk and pound symbols indicate statistically significant differences of ctrl\_0h (at the start of treatments), HL\_4h (after 4 h high light), and HT\_4h (after 4 h temperature) compared to ctrl\_4h (after 4 h control treatment) using Student's two-tailed t-test with unequal variance (\* $0.01 < p < 0.05$ , # $p < 0.01$ ).

**a**

| All differentially expressed genes (DEGs) sorted into fold change (FC) bins | HL_1h | HL_2h | HL_4h | HT_1h | HT_2h | HT_4h |
|-----------------------------------------------------------------------------|-------|-------|-------|-------|-------|-------|
| Highly induced, $FC \geq 5$                                                 | 176   | 292   | 276   | 87    | 71    | 65    |
| Moderately induced, $2 \leq FC < 5$                                         | 738   | 1075  | 949   | 334   | 278   | 316   |
| Slightly induced, $0 < FC < 2$                                              | 576   | 1028  | 906   | 382   | 517   | 372   |
| No change, $FC = 0$                                                         | 5301  | 3731  | 4261  | 6537  | 6468  | 6597  |
| Slightly repressed, $-2 < FC < 0$                                           | 534   | 890   | 894   | 341   | 416   | 499   |
| Moderately repressed, $-5 < FC \leq -2$                                     | 616   | 894   | 717   | 398   | 340   | 309   |
| Highly repressed, $FC \leq -5$                                              | 242   | 273   | 180   | 94    | 93    | 25    |

  

**b**

| Highly induced or repressed genes in at least 1 time point | Highly Induced $FC \geq 5$ | Highly Repressed $FC \leq -5$ |
|------------------------------------------------------------|----------------------------|-------------------------------|
| High Light                                                 | 496                        | 424                           |
| High Temperature                                           | 167                        | 210                           |
| High light & high temperature overlapped                   | 42                         | 13                            |

**Supplementary Figure 5. High light had more differentially regulated genes (DEGs) than high temperature while both also had overlapping DEGs. (a)** Table of DEGs sorted into bins based on their DeSeq2 fold change values at each time point of high light (HL) or high temperature (HT) treatment. All genes that are differentially expressed in at least one timepoint are shown, those that are not differentially expressed at a given time point are represented in the “No change,  $FC = 0$ ” category. **(b)** Number of genes that are highly induced ( $FC \geq 5$ ) or highly repressed ( $FC \leq -5$ ) in at least one time point in either HL or HT treatment. 42 genes are highly induced in at least one timepoint in both HL and HT and 13 genes are highly repressed in both HL and HT.

a

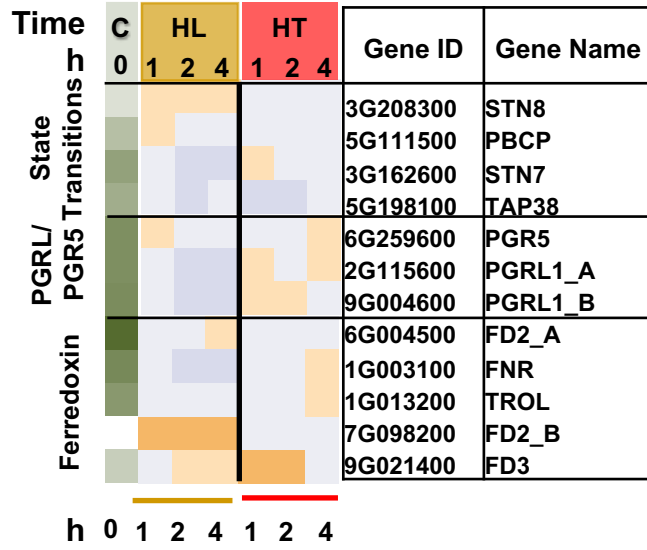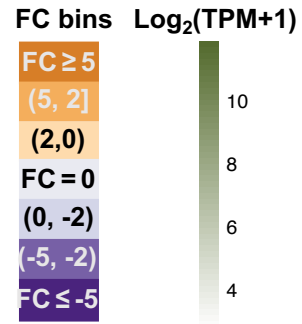

b

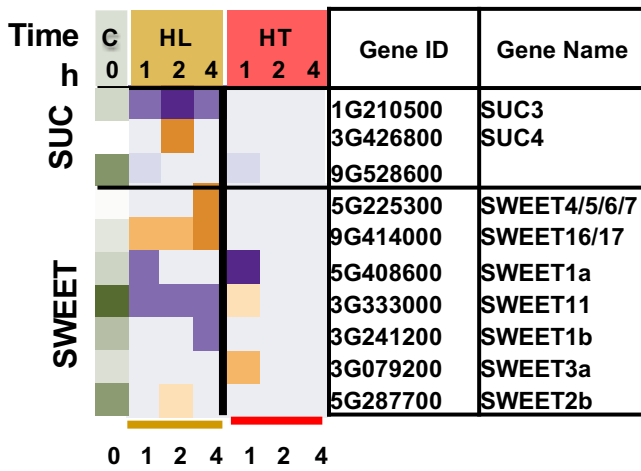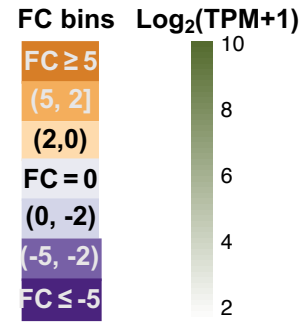

C

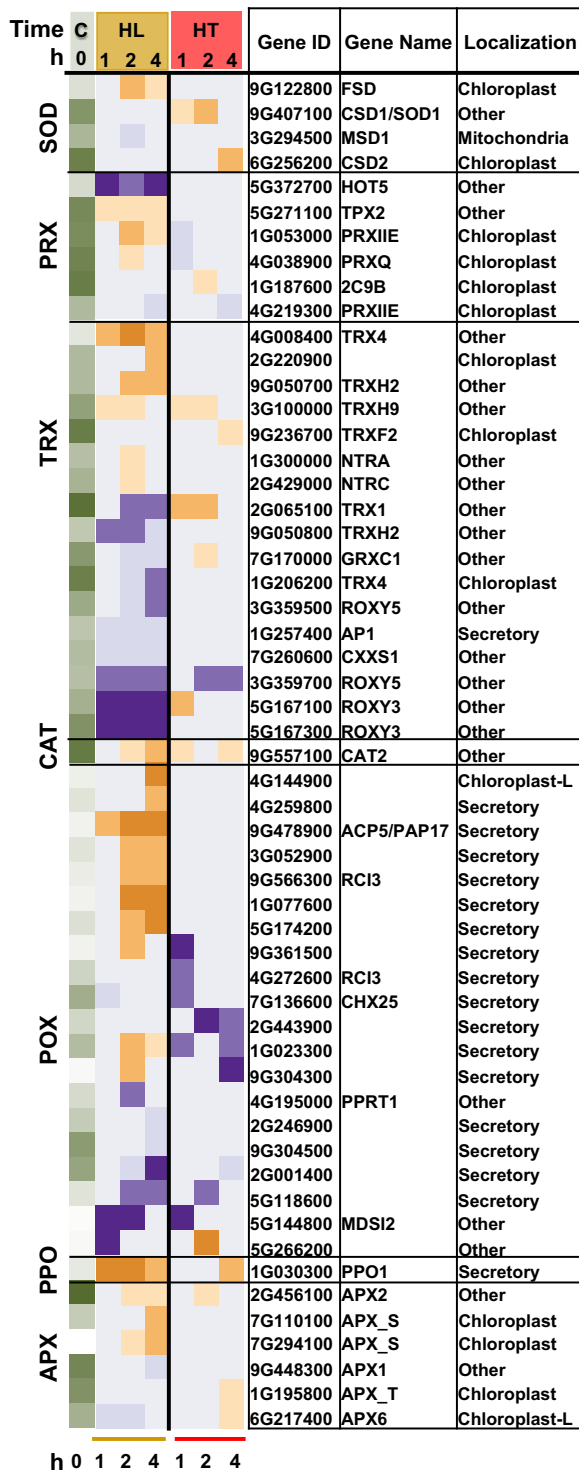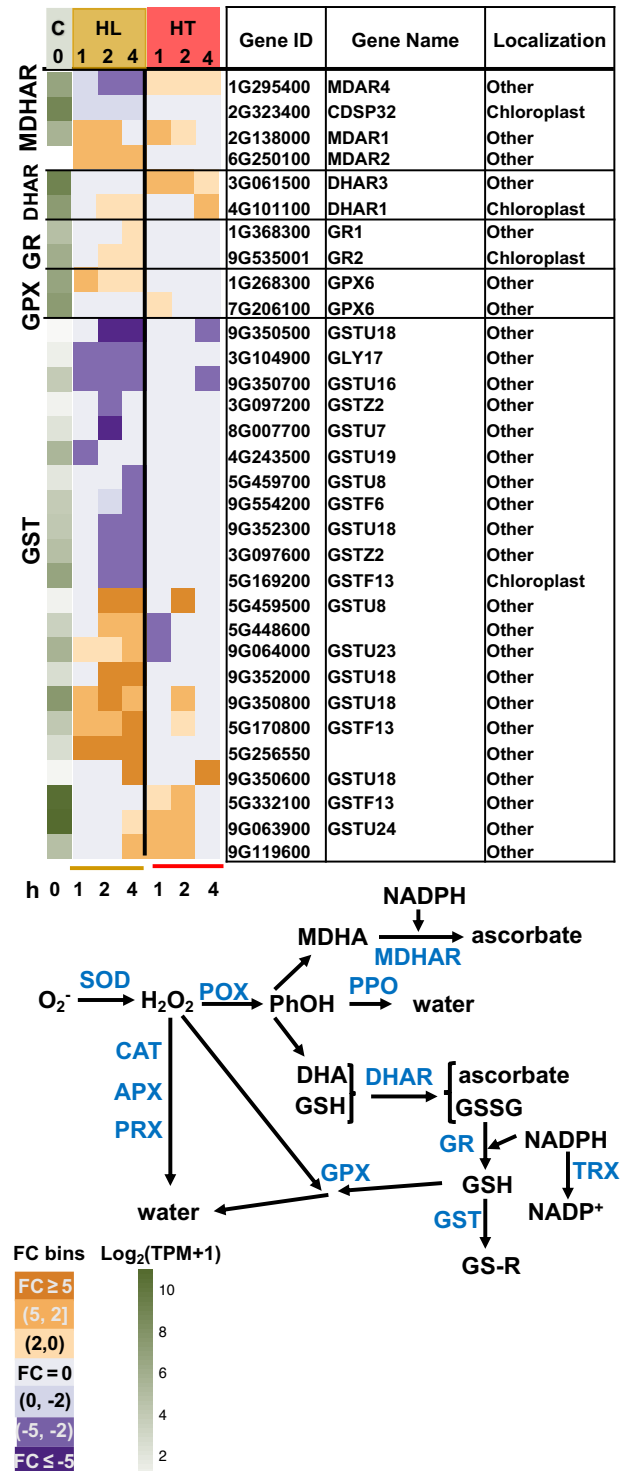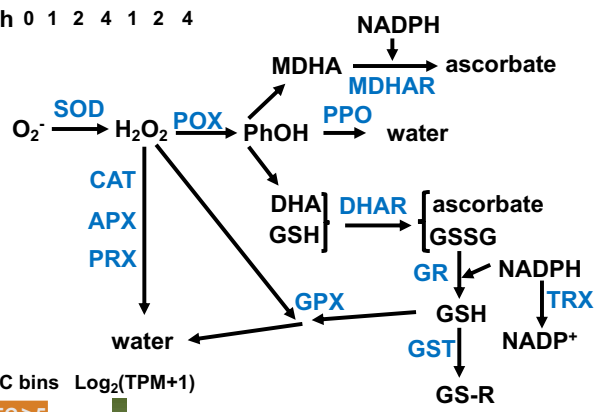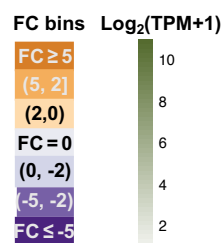

Supplementary Figure 6. High light (HL) or high temperature (HT) differentially regulated genes involved in various pathways associated with photosynthesis. (a) Alternative light reactions of photosynthesis. *PGR5* (proton gradient regulation 5) and

*PGRL1* (*PGR5-like photosynthetic phenotype 1*) are genes involved in cyclic electron transport around photosystem I. **(b)** Genes encoding sugar transporters. *SUC* (*Sucrose-proton symporters*) and *SWEET* (*Sugar Will Eventually Exported Transporters*) encode sucrose transporters. **(c)** Genes involved in antioxidant defense pathways. SOD: superoxide dismutase; PRX: peroxiredoxins; TRX: thioredoxin; CAT: catalase. POX: peroxidases. PPO: polyphenol oxidase; APX: ascorbate peroxidase; MDHAR: monodehydroascorbate reductase; DHAR: dehydroascorbate reductase; GR: glutathione reductase; GPX: glutathione peroxidase; GST: glutathione S-transferase. These antioxidant enzymes are colored in blue in the antioxidant defense pathways based on Hasanuzzaman et al<sup>57</sup>. SOD leads the frontline defense in the antioxidant defense system by converting superoxide anion ( $O_2^-$ ) into hydrogen peroxide ( $H_2O_2$ ) which is further detoxified to water ( $H_2O$ ) by one of these enzymes: POX, CAT, APX, PRX, or GPX. MDHA, monodehydroascorbate; PhOH, phenolic compounds; DHA, dehydroascorbate; GSH, reduced Glutathione; GSSG, oxidized glutathione; R, aliphatic, aromatic, or heterocyclic group; NADPH, nicotinamide adenine dinucleotide phosphate. Most antioxidant enzymes have multiple gene family members in *S. viridis*. The first green column displays  $\log_2(\text{mean TPM} + 1)$  at ctrl\_0h (at the start of treatments, C). TPM, transcripts per million, normalized read counts. Heatmap displays the fold change (FC) bin of DeSeq2 model output values at 1, 2, 4 h of HL or HT versus control at the same timepoint ( $q < 0.05$ ). FC bins: highly induced:  $FC \geq 5$ ; moderately induced:  $5 > FC \geq 2$ ; slightly induced:  $2 > FC > 0$ ; not differentially expressed:  $FC = 0$ ; slightly repressed:  $0 > FC > -2$ ; moderately repressed:  $-2 \geq FC > -5$ ; highly repressed:  $FC \leq -5$ . Gene ID: *S. viridis* v2.1 gene ID, excluding "Sevir.". All genes presented in the heatmaps were significantly differentially regulated in at least one time point.



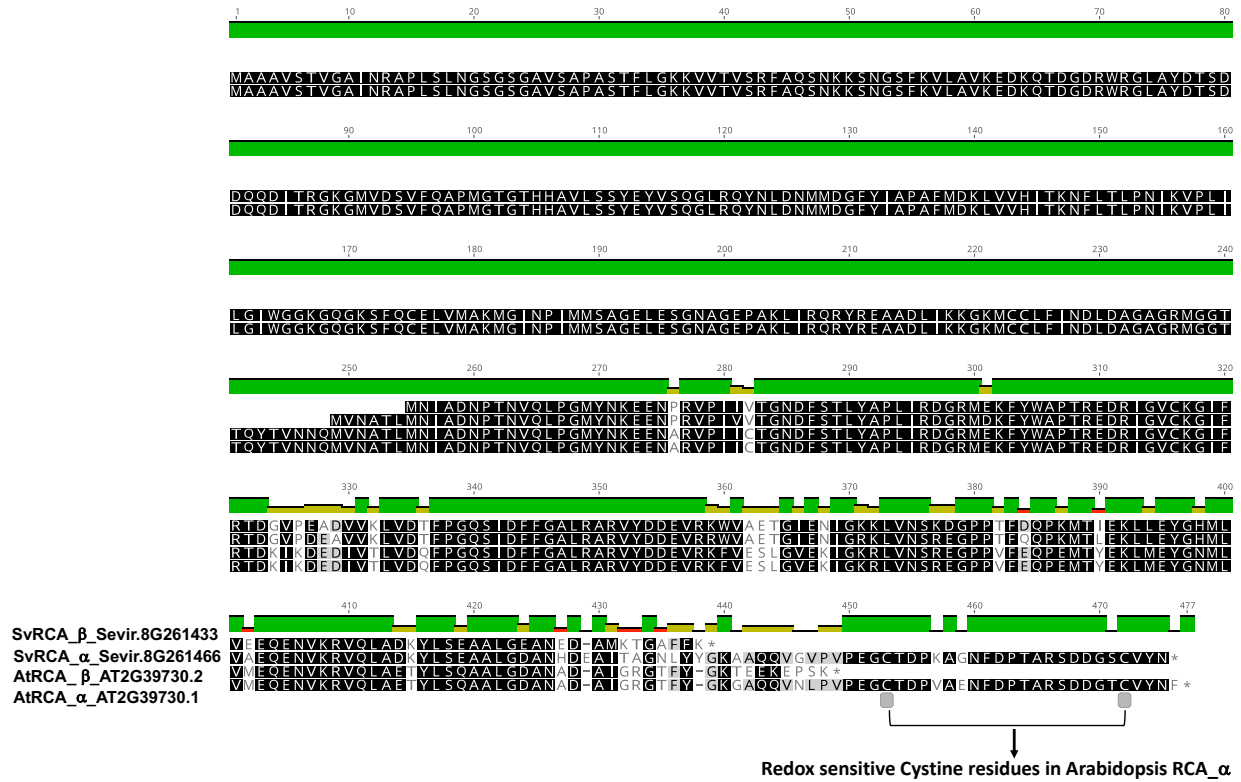

Supplementary Figure 7. Peptide sequence alignment of two *S. viridis* Rubisco Activases (RCAs) with *A. thaliana* RCAs reveals  $\alpha$  and  $\beta$  copies of RCA in *S. viridis*. *A. thaliana* RCA<sub>α</sub> has two redox sensitive cysteine residues, which are retained in the *S. viridis* RCA<sub>α</sub> copy.

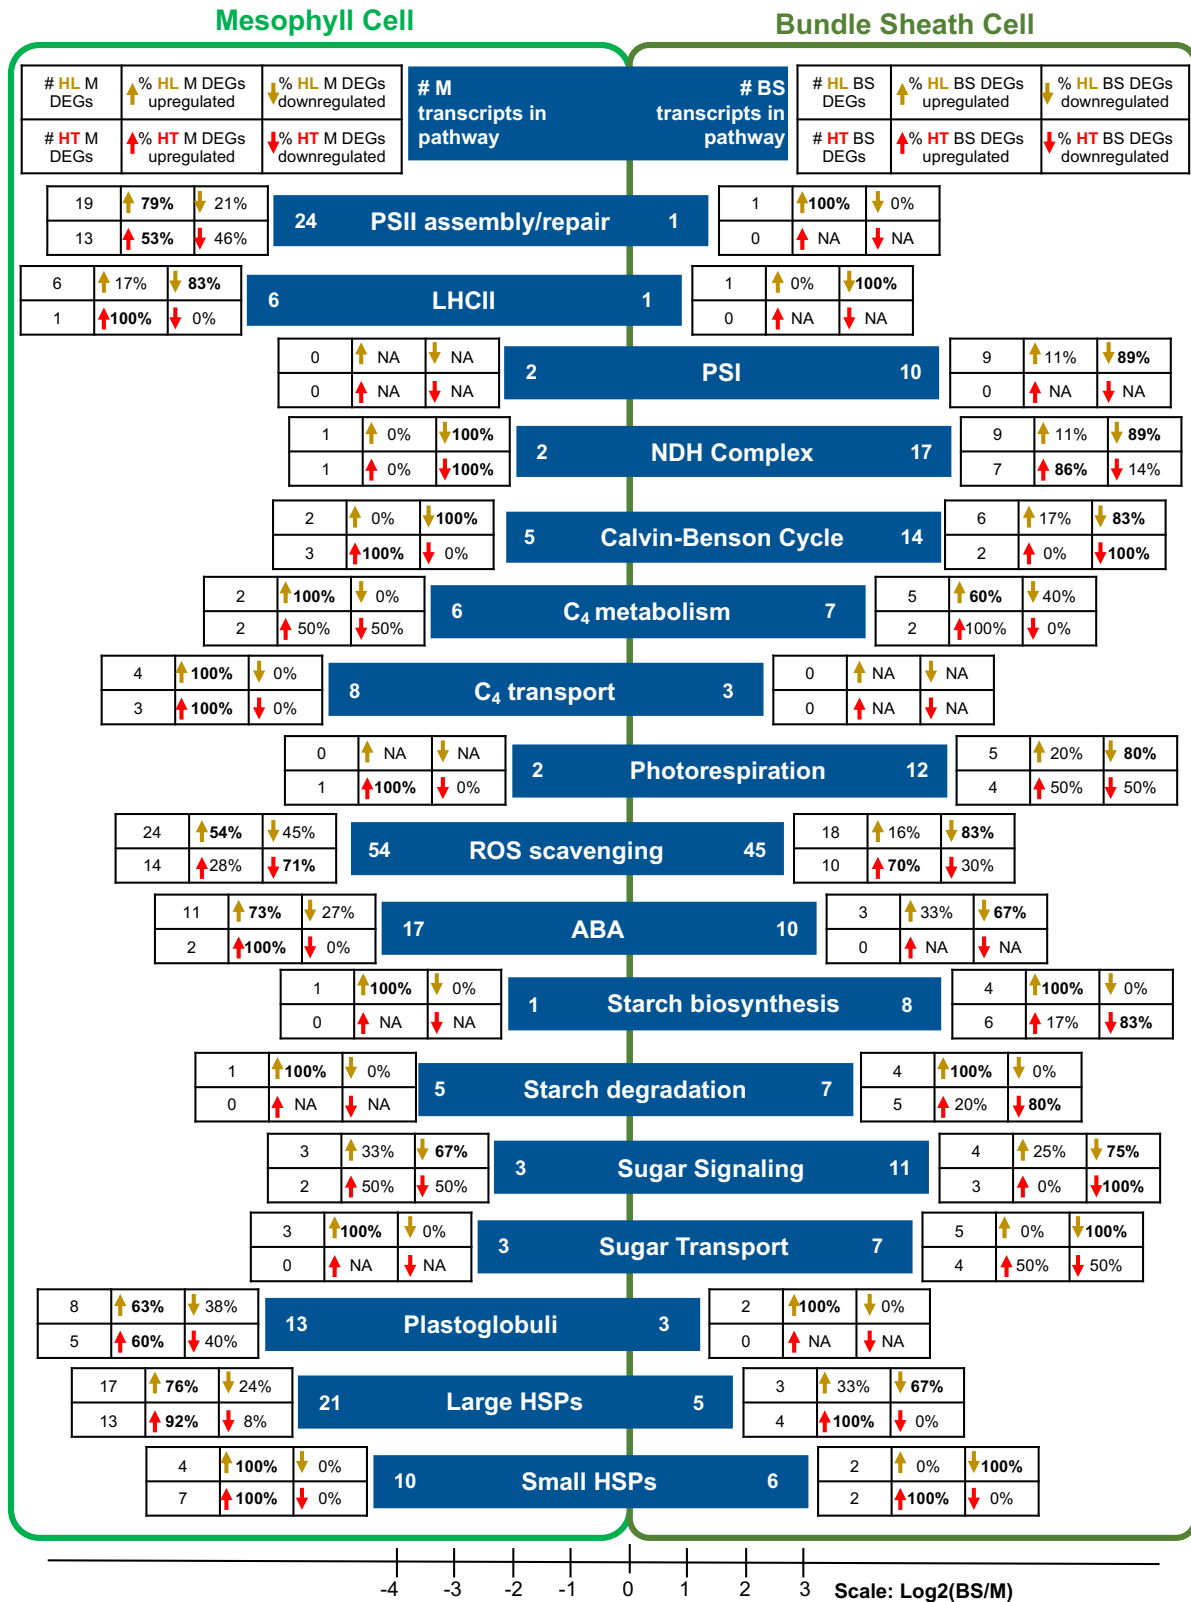

Supplementary Figure 8. Mesophyll (M) and bundle sheath (BS) specificity of

**differentially expressed genes reveals cell type specific responses to high light (HL) or high temperature (HT).** Light and dark green box denotes M and BS cells, respectively. The blue horizontal bars denote pathways of interest we investigated. Position of blue horizontal bars indicates cell type specificity of pathways, and represents the  $\text{Log}_2(\text{number of BS specific transcripts}/\text{number of M specific transcripts associated with a pathway})$  according to the published M and BS specific transcriptome data in *S. viridis* under the control condition<sup>58</sup>. The numbers at the left and right end of each blue horizontal bar represent the numbers of M or BS specific transcripts associated with this pathway. Pathways that are preferentially expressed in M cells (more M than BS specific transcripts,  $\text{log}_2(\text{BS}/\text{M}) < 0$ ) under control conditions include PSII assembly, LHCII, C<sub>4</sub> transport, ROS scavenging, ABA, PG, and HSPs. Pathways that are preferentially expressed in BS cells (more BS than M specific transcripts,  $\text{log}_2(\text{BS}/\text{M}) > 0$ ) under control conditions include PSI, NDH complex, Calvin-Benson cycle, C<sub>4</sub> metabolism, photorespiration, starch biosynthesis/degradation, sugar signaling, and sugar transport. Legends for M and BS specific transcript data in responses to HL or HT are on the top part of the light and dark green box, respectively. Each pathway has a table of data for each cell type. For each table, the first column indicates the number of M or BS specific transcripts related to a pathway that were differentially expressed in HL (top) or HT (bottom) in at least one time point. The rest two columns of the table represent the fraction of up- (2<sup>nd</sup> Col) or down-regulated (3<sup>rd</sup> Col) transcripts out of the total number of cell-type specific differentially expressed genes (DEGs) related to a pathway in HL (top) or HT (bottom). Bolded percentage indicates the larger portion (either up- or down-regulated) in HL or HT in each cell type. In HL, 83% of the BS-specific ROS-scavenging DEGs were down-regulated, whereas 54% of M-specific ROS-scavenging DEGs were up-regulated. In contrast, in HT, the majority of BS-specific ROS-scavenging DEGs were up-regulated while M-specific ROS-scavenging DEGs were down-regulated, which may be related to heat-induced photorespiration in BS chloroplasts. In HL, all differentially expressed sugar transports were up-regulated in M cells but down-regulated in BS cells. For HSPs, the majority of M-specific DEGs were up-regulated while the majority of BS-specific DEGs were down-regulated in HL. However, in HT, the majority DEGs of HSPs in both M and BS cells were upregulated.

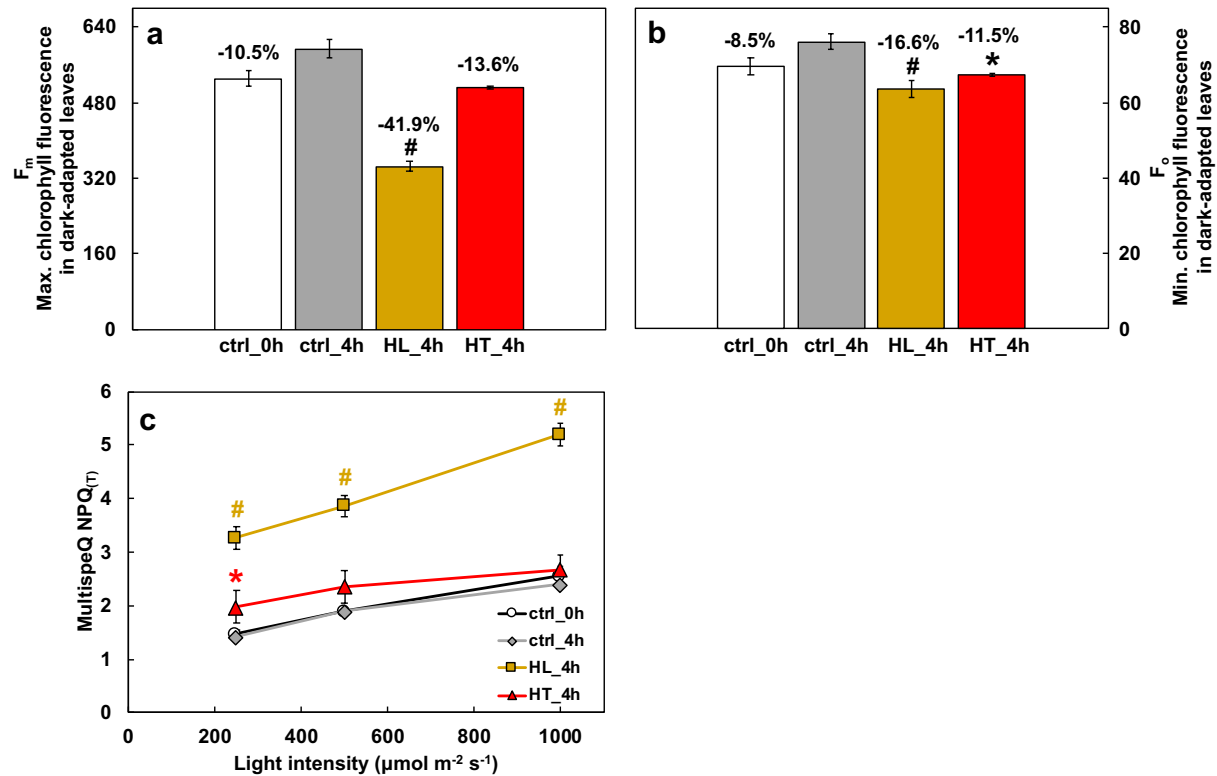

**Supplementary Figure 9. High light (HL) resulted in significant reduction of maximum chlorophyll fluorescence ( $F_m$ ) and the HL-induced NPQ was confirmed by using MultispeQ. (a)** HL treatments resulted in significantly reduced maximal chlorophyll fluorescence in 20 min dark-adapted leaves ( $F_m$ ), however,  $F_m$  in ctrl\_4h leaves were consistent among replicates. **(b)** HL and HT treatments resulted in reduced minimum chlorophyll fluorescence in dark-adapted leaves ( $F_0$ ) but  $F_0$  in ctrl\_4h leaves were consistent among replicates. Percentages indicate reduction in  $F_m$  or  $F_0$  compared to ctrl\_4h. **(c)** Estimated Non-photochemical quenching,  $NPQ_{(T)}$ , calculated by  $F_0'$  and  $F_m'$  obtained during light response using MultispeQ.  $F_0'$  and  $F_m'$  are minimum and maximum chlorophyll fluorescence in light-adapted leaves. Mean  $\pm$  SE,  $n = 3-6$  biological replicates. Asterisk and pound symbols indicate statistically significant differences of ctrl\_0h (at the start of treatments), HL\_4h (after 4 h HL), and HT\_4h (after 4 h HT) compared to ctrl\_4h (after 4 h control treatment) using Student's two-tailed t-test with unequal variance (\* $0.01 < p < 0.05$ , # $p < 0.01$ ). For panel c, the colors of \* and # match the significance of the indicated conditions, yellow for HL\_4h, red for HT\_4h).

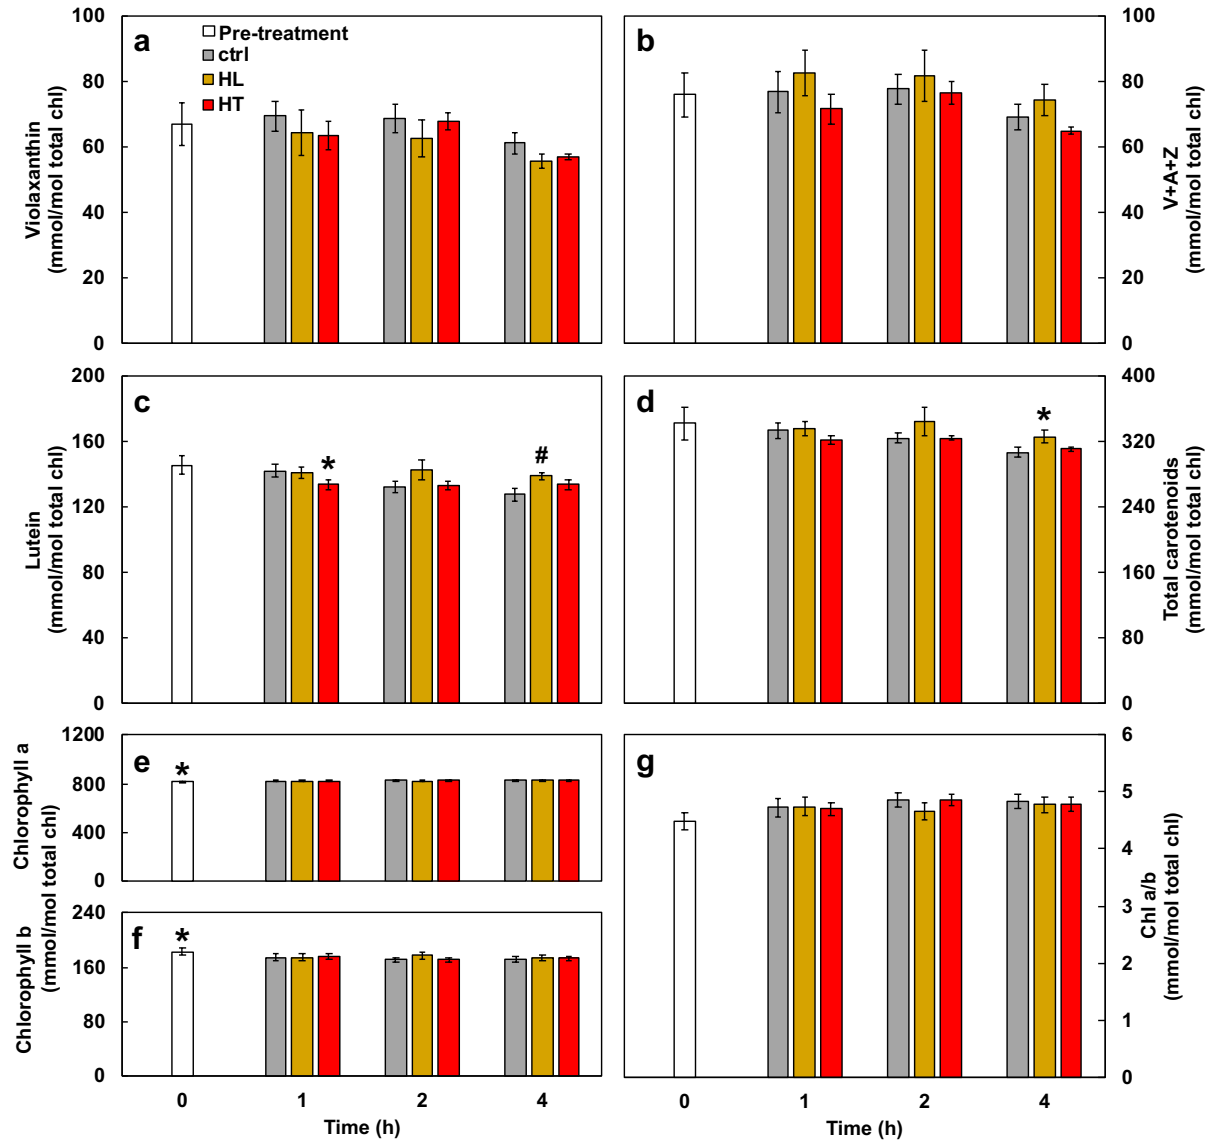

**Supplementary Figure 10. High light treatment increased lutein and carotenoids formation.** Leaves of *S. viridis* were harvested for high-performance liquid chromatography (HPLC) analysis before treatment or after 1, 2, 4 h treatments of control growth condition (ctrl, 31°C and 250  $\mu\text{mol m}^{-2} \text{s}^{-1}$ ), or high light (HL, 31°C and 900  $\mu\text{mol m}^{-2} \text{s}^{-1}$ ) or high temperature (HT, 40°C and 250  $\mu\text{mol m}^{-2} \text{s}^{-1}$ ). **(a)** Violaxanthin. **(b)** Total xanthophyll pool (violaxanthin + antheraxanthin + zeaxanthin, V+A+Z). **(c)** Lutein. **(d)** Total carotenoids. **(e,f)** Chlorophyll a and b. **(g)** Chlorophyll a/b ratio. Mean  $\pm$  SE,  $n = 3$  biological replicates. \* $0.01 < p < 0.05$ , # $p < 0.01$ , compared to control leaves at the same time points. Students' two-tailed t-test with unequal variance.

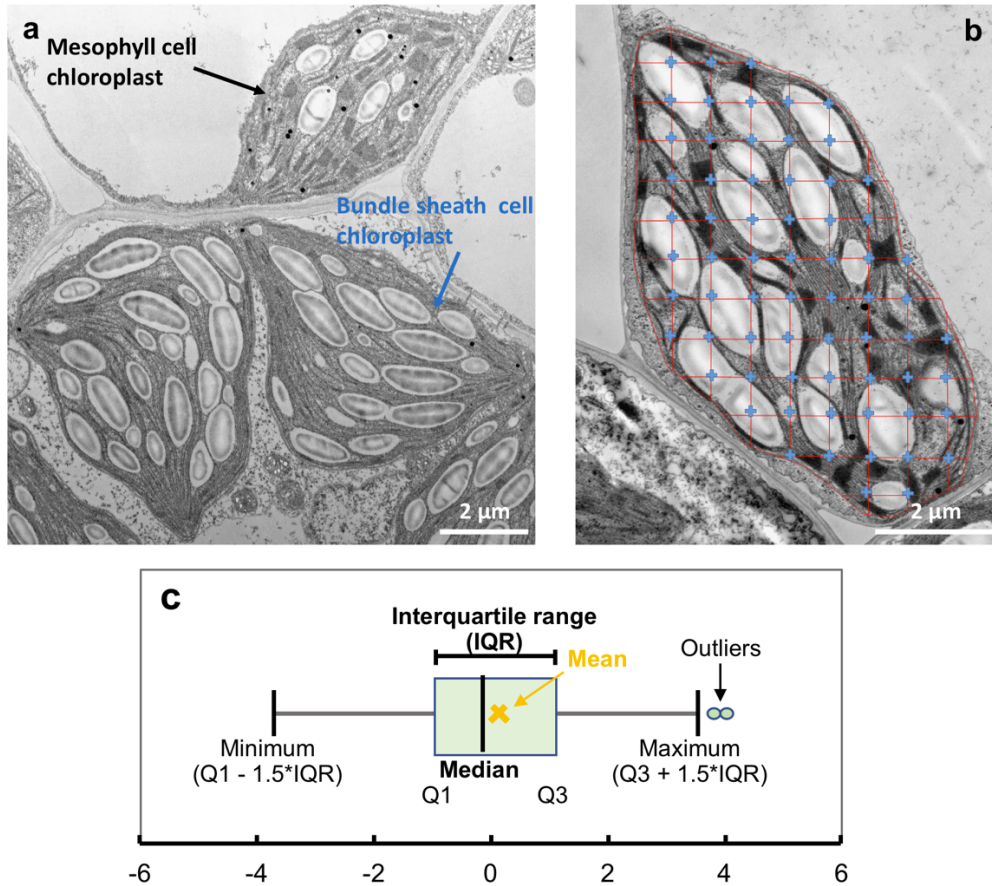

**Supplementary Figure 11. Representative transmission electron microscopy (TEM) images illustrate two cell types in *S. viridis* leaves, Stereo Analyzer analysis to quantify chloroplast structures, and boxplot of TEM data. (a)** TEM image of chloroplasts of the two cell types in *S. viridis*: mesophyll cells and bundle sheath cells. **(b)** Illustration of Stereo Analyzer analysis for TEM images, which was used to calculate the relative volume of a cellular structures, e.g. starch granules. The Stereo Analyzer outlines a chloroplast with equally spaced uniform grid within the outlined area. The blue crossings of the grid inside the chloroplast are identified as either starch granule, stroma, stroma lamellae, or grana when they overlap with these structures. When all crossings have been identified, the software provides the % of relative volume for each structure of interest. **(c)** Illustration of TEM boxplots based on Tukey-style whiskers. Q1, first quartile; Q3, third quartile; IQR, interquartile range. The median value is represented by the vertical black line between Q1 and Q3. The mean value is represented by the yellow X sign.

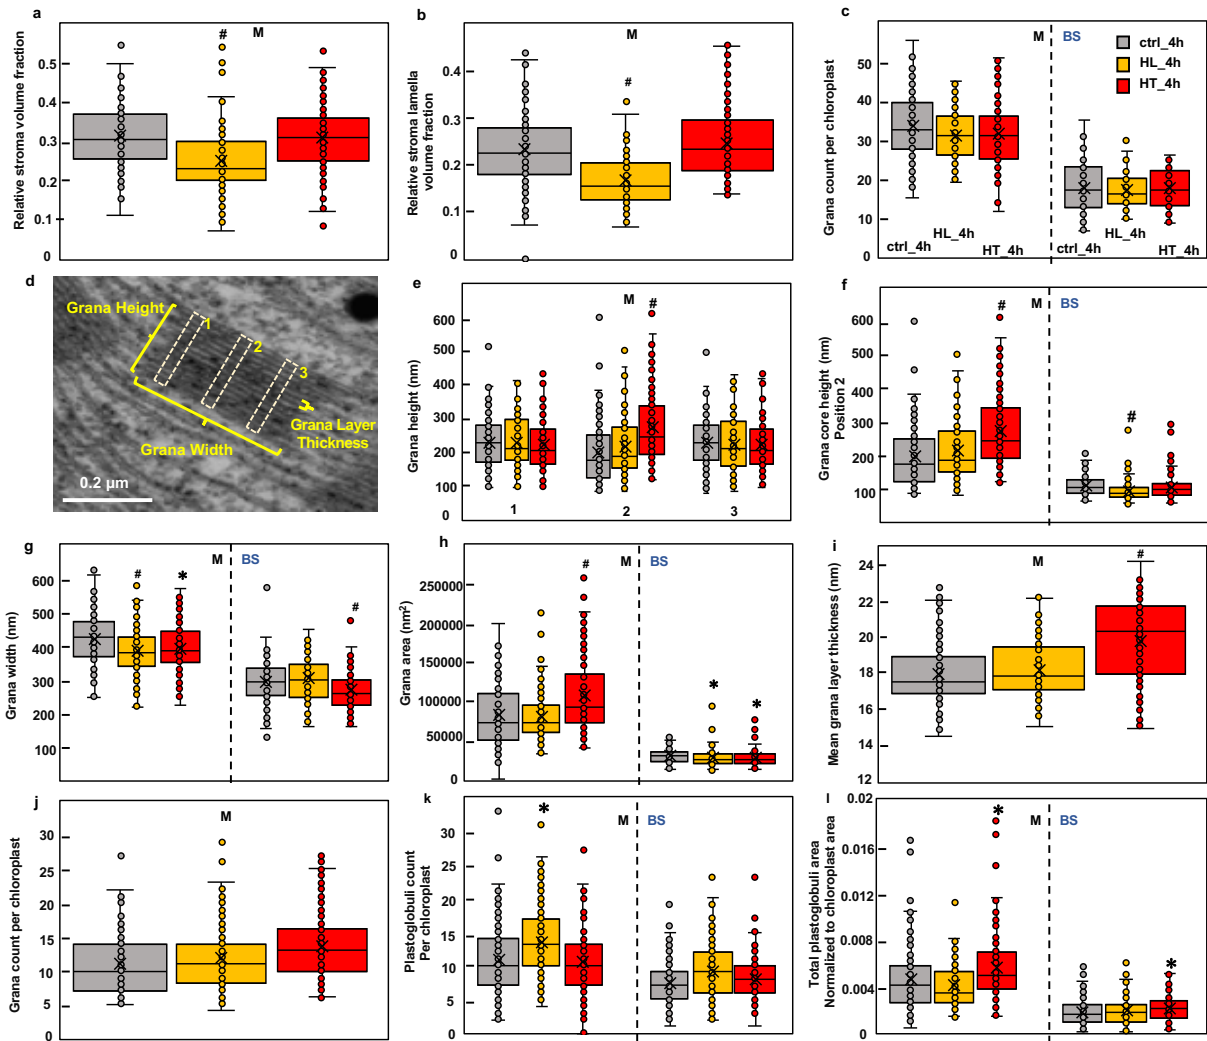

**Supplementary Figure 12. High light or high temperature altered various chloroplast structures in *S. viridis* leaves.** Chloroplast structure changes after 4 h different treatments of control growth condition (ctrl\_4h, 31°C and 250  $\mu\text{mol m}^{-2} \text{s}^{-1}$ ), or high light (HL\_4h, 31°C and 900  $\mu\text{mol m}^{-2} \text{s}^{-1}$ ) or high temperature (HT\_4h, 40°C and 250  $\mu\text{mol m}^{-2} \text{s}^{-1}$ ). M, mesophyll chloroplast; BS, bundle sheath chloroplast. **(a, b)** Relative volume fractions were quantified using Stereo Analyzer with Kolmogorov–Smirnov test for statistical analysis compared to the same cell type of the control condition. **(e, f, g, l)** Parameters related to size and area were quantified using ImageJ with two-tailed t-test with unequal variance compared to the same cell type of the control condition. **(c, j, k)** The counting data was quantified using ImageJ followed by the negative binomial test for significance compared to the same cell type of the control condition. **(d, e)** Position 1 and

3 on grana are to measure the height of grana margin and position 2 is to measure the height of grana core. **(h)** Assuming grana are rectangular, grana area was estimated as grana core height multiplied by grana width. **(i)** The mean grana layer thickness was calculated as grana core height divided by the number of grana layers. Each treatment had three biological replicates with 90-120 images.



| Table of Parameters Compared to Control Condition |  |                      |       |       |       |
|---------------------------------------------------|--|----------------------|-------|-------|-------|
|                                                   |  | Treatment Condition: |       |       |       |
|                                                   |  | HL_M                 | HL_BS | HT_M  | HT_BS |
|                                                   |  | ↑ 58%                | ↑ 67% | ↓ 19% | ↑ 10% |
| Relative Starch Volume                            |  | ↑ 33%                | ↑ 29% | ↑ 14% | N.S.  |
| Chloroplast Area                                  |  | ↓ 24%                | ↓ 36% | N.S.  | N.S.  |
| Relative Stroma + Stroma Lamella Volume           |  | ↓ 20%                | N/A   | N.S.  | N/A   |
| Relative Stroma Volume                            |  | ↓ 29%                | N/A   | N.S.  | N/A   |
| Relative Stroma Lamella Volume                    |  | N.S.                 | ↓ 37% | ↑ 24% | ↓ 26% |
| Relative Grana Volume                             |  | N.S.                 | ↓ 16% | ↑ 36% | N.S.  |
| Grana Core Height, position 2                     |  | N.S.                 | N/A   | N.S.  | N/A   |
| Grana Margin Height, position 1, 3                |  | ↓ 9%                 | N.S.  | ↓ 6%  | ↓ 8%  |
| Grana Width                                       |  | N.S.                 | ↓ 11% | ↑ 29% | ↓ 12% |
| Grana Area                                        |  | N.S.                 | N/A   | ↑ 10% | N/A   |
| Mean Grana Layer Thickness                        |  | N.S.                 | N.S.  | N.S.  | N.S.  |
| Grana Count per Chloroplast Area                  |  | ↓ 30%                | ↓ 24% | ↓ 16% | N.S.  |
| Grana Count Normalized to Chloroplast Area        |  | N.S.                 | N/A   | N.S.  | N/A   |
| Grana Layer Count                                 |  | ↑ 27%                | N.S.  | N.S.  | N.S.  |
| PG Count per Chloroplast                          |  | ↓ 7%                 | ↑ 11% | ↑ 38% | ↑ 19% |
| Individual PG Size                                |  | ↑ 20%                | ↑ 41% | ↑ 39% | ↑ 26% |
| Total PG Area per Chloroplast                     |  | N.S.                 | N.S.  | ↑ 21% | ↑ 7%  |
| PG Area Normalized to Chloroplast Area            |  |                      |       |       |       |

  

| Key             |      |
|-----------------|------|
| Increase        | ↑    |
| Decrease        | ↓    |
| Not Available   | N/A  |
| Not Significant | N.S. |

**Supplementary Figure 13. Summary of chloroplast structure changes by using transmission electron microscopy (TEM) images** in leaves after 4 h treatments of high light (HL, 31°C and 900  $\mu\text{mol m}^{-2} \text{s}^{-1}$ ) or high temperature (HT, 40°C and 250  $\mu\text{mol m}^{-2} \text{s}^{-1}$ ) as compared to the control growth condition (ctrl, 31°C and 250  $\mu\text{mol m}^{-2} \text{s}^{-1}$ ). BS, bundle sheath chloroplast; M, mesophyll chloroplast. PG, plastoglobuli. Mean value of each parameter was used for comparison. Yellow highlighted cells and upward arrows denote increased percentages as compared to the control condition. Blue highlighted cells and downward arrows denote decreased percentage as compared to the control condition. Grey highlighted cells and N/A mean data unavailable due to the difficulties to quantify some structures in the BS chloroplasts. White cells and N.S. mean no significant differences between HL or HT as compared to the control treatment.

| High light    | Parameters                                         | High temperature   |
|---------------|----------------------------------------------------|--------------------|
| ↓             | net CO <sub>2</sub> assimilation, after 4 h stress | ↓                  |
| ↓             | Stomatal conductance, during stress                | ↑                  |
| ↑             | Leaf ABA level                                     | No change          |
| Many ↑        | ABA pathway transcripts                            | Little change      |
| ↑ M & BS      | PG formation in chloroplasts                       | ↑ M & BS           |
| Many ↑        | Genes encoding PG localized proteins               | Little change      |
| ↑ M & BS      | Starch accumulation                                | ↑ in BS but ↓ in M |
| Many ↑        | starch biosynthesis/degradation transcripts        | Little change      |
| ↑             | Chloroplast crowdedness                            | Little change      |
| ↓             | ATP synthase activity                              | Little change      |
| ↓             | Transcripts involved in light reaction             | Little change      |
| Many ↑        | Transcripts involved in photoprotection            | Little change      |
| ↑             | Zeaxanthin                                         | Little change      |
| Significant ↑ | NPQ                                                | Slightly ↑         |
| ↑             | Photoinhibition                                    | Little change      |
| ↑ slowly      | Transcripts of HSPs                                | ↑ quickly          |
| ↑             | HSFs, different genes ↑ under HL or HT             | ↑                  |
| Little change | Transcripts of RCA- $\alpha$                       | ↑                  |
| Slightly ↓    | Transcripts involved in CEF                        | Slightly ↑         |
| Stable        | Overall transcriptional changes                    | Transient          |

**Supplementary Figure 14. Summarized multi-level changes of *S. viridis* in response to 4 h high light or high temperature treatments as compared to the control treatment.** Upward arrows denote increase or induction; downward arrows denote decrease or repression. HL, high light; HT, high temperature; ABA, abscisic acid; M, mesophyll chloroplast; BS, bundle sheath chloroplast; PG, plastoglobuli; NPQ, non-photochemical quenching; HSP, heat shock protein; HSF, heat shock transcription factor; RCA, Rubisco activase; CEF, cyclic electron flow around PSI.
