# Supplementary material for: High Light and High Temperature Reduce Photosynthesis via Different Mechanisms in the C4 Model Setaria viridis
Source: bioRxiv or medRxiv preprint supplement (doi:10.1101/2021.02.20.431694), 2021-02-20
Supplement: Supplementary file [file media-1.pdf]

| Description                                            | Label              | Units                                | Formula                                                                                                                                                                                                                                                                                                                                                                                                                                                                                                                                                                                                                                                          |
|--------------------------------------------------------|--------------------|--------------------------------------|------------------------------------------------------------------------------------------------------------------------------------------------------------------------------------------------------------------------------------------------------------------------------------------------------------------------------------------------------------------------------------------------------------------------------------------------------------------------------------------------------------------------------------------------------------------------------------------------------------------------------------------------------------------|
| Net CO <sub>2</sub> assimilation rate                  | $A_{Net}$          | $\mu\text{mol m}^{-2} \text{s}^{-1}$ | $A = \frac{Flow(CO_{2R} - CO_{2S} \left( \frac{1000 - H_2O_R}{1000 - H_2O_S} \right))}{100S}$ <p> <i>Flow</i>: air flow rate (<math>\mu\text{mol s}^{-1}</math>)<br/> <i>CO<sub>2R</sub></i>: reference cell CO<sub>2</sub> concentration (<math>\mu\text{mol mol}^{-1}</math>)<br/> <i>CO<sub>2S</sub></i>: sample cell CO<sub>2</sub> concentration (<math>\mu\text{mol mol}^{-1}</math>)<br/> <i>H<sub>2O<sub>R</sub></sub></i>: reference cell H<sub>2</sub>O mole fraction (mmol mol<sup>-1</sup>)<br/> <i>H<sub>2O<sub>S</sub></sub></i>: sample cell H<sub>2</sub>O mole fraction (mmol mol<sup>-1</sup>)<br/> <i>S</i>: leaf area in cm<sup>2</sup> </p> |
| Transpiration rate                                     | $E$                | $\text{mol m}^{-2} \text{s}^{-1}$    | $E = \frac{Flow(H_2O_S - H_2O_R)}{1000S(1000 - H_2O_S)}$                                                                                                                                                                                                                                                                                                                                                                                                                                                                                                                                                                                                         |
| Stomatal conductance to water vapor                    | $g_{sw}$           | $\text{mol m}^{-2} \text{s}^{-1}$    | $g_{sw} = \frac{2}{\left( \frac{1}{g_{tw}} - \frac{1}{g_{bw}} \right) + \sqrt{\left( \frac{1}{g_{tw}} - \frac{1}{g_{bw}} \right)^2 + \frac{4K}{(K+1)^2} \left( 2 \frac{1}{g_{tw}} - \frac{1}{g_{bw}} \right) \frac{1}{g_{bw}}}}$ <p> <i>g<sub>tw</sub></i>: total conductance of the leaf to water vapor (<math>\text{mol m}^{-2} \text{s}^{-1}</math>)<br/> <i>g<sub>bw</sub></i>: boundary layer conductance to water vapor (<math>\text{mol m}^{-2} \text{s}^{-1}</math>)<br/> <i>K</i>: stomatal ratio </p>                                                                                                                                                  |
| Intercellular CO <sub>2</sub>                          | $C_i$              | $\mu\text{mol mol}^{-1}$             | $C_i = \frac{\left( g_{tc} - \frac{E}{2} \right) CO_{2S} - A}{g_{tc} + \frac{E}{2}}$                                                                                                                                                                                                                                                                                                                                                                                                                                                                                                                                                                             |
| Maximal chlorophyll fluorescence, dark-adapted leaves  | $F_m$              |                                      |                                                                                                                                                                                                                                                                                                                                                                                                                                                                                                                                                                                                                                                                  |
| Maximal chlorophyll fluorescence, light-adapted leaves | $F_m'$             |                                      |                                                                                                                                                                                                                                                                                                                                                                                                                                                                                                                                                                                                                                                                  |
| Minimal chlorophyll fluorescence, dark-adapted leaves  | $F_o$              |                                      |                                                                                                                                                                                                                                                                                                                                                                                                                                                                                                                                                                                                                                                                  |
| Minimal chlorophyll fluorescence, light-adapted leaves | $F_o'$             |                                      |                                                                                                                                                                                                                                                                                                                                                                                                                                                                                                                                                                                                                                                                  |
| Steady state fluorescence                              | $F_s$              |                                      |                                                                                                                                                                                                                                                                                                                                                                                                                                                                                                                                                                                                                                                                  |
| Variable chlorophyll fluorescence                      | $F_v$              |                                      | $F_v = F_m - F_o$                                                                                                                                                                                                                                                                                                                                                                                                                                                                                                                                                                                                                                                |
| PSII maximum efficiency in dark-adapted leaves         | $F_v/F_m$          |                                      | $F_v/F_m = \frac{F_v}{F_m} = 1 - \frac{F_o}{F_m}$                                                                                                                                                                                                                                                                                                                                                                                                                                                                                                                                                                                                                |
| Non-photochemical quenching                            | NPQ                |                                      | $NPQ = \frac{(F_m - F_m')}{F_m'}$                                                                                                                                                                                                                                                                                                                                                                                                                                                                                                                                                                                                                                |
| Estimated NPQ                                          | NPQ <sub>(T)</sub> |                                      | $NPQ_{(T)} = \left( \frac{4.88}{\frac{F_m'}{F_o'} - 1} \right) - 1$                                                                                                                                                                                                                                                                                                                                                                                                                                                                                                                                                                                              |
| PSII operating efficiency                              | $\Phi_{PSII}$      |                                      | $\Phi_{PSII} = 1 - \frac{F_s}{F_m'}$                                                                                                                                                                                                                                                                                                                                                                                                                                                                                                                                                                                                                             |
| Electron transport rate                                | ETR                | $\mu\text{mol m}^{-2} \text{s}^{-1}$ | $ETR = (\Phi_{PSII})(0.5)(Qabs_{f_s})$ <p><i>Qabs<sub>f<sub>s</sub></sub></i>: absorbed light corresponding to the last <i>F<sub>s</sub></i> measurement</p>                                                                                                                                                                                                                                                                                                                                                                                                                                                                                                     |
| Fraction of open PSII centers                          | $q_L$              |                                      | $q_L = q_P * \frac{F_o'}{F_s}$                                                                                                                                                                                                                                                                                                                                                                                                                                                                                                                                                                                                                                   |
| Plastoquinone redox status                             | $Q_A$              |                                      | $Q_A = 1 - q_L$                                                                                                                                                                                                                                                                                                                                                                                                                                                                                                                                                                                                                                                  |
